# Supplementary material for: Synthesis of lactosamine-based building blocks on a practical scale and investigations of their assembly for the preparation of19F-labelled LacNAc oligomers
Source: Royal Society of Chemistry journal article supplement (doi:10.1039/c8ob03066a), 2019-01-01

## SUPPLEMENTARY INFORMATION (2)

### Synthesis of lactosamine-based building blocks and investigations of their assembly for the preparation of <sup>19</sup>F labelled LacNAc oligomers

Cecilia Romanò,<sup>a,†</sup> Stefan Oscarson<sup>\*a</sup>

#### Author affiliations

<sup>a</sup> School of Chemistry, University College Dublin, Belfield, Dublin 4, Ireland; **e-mail:** stefan.oscarson@ucd.ie

<sup>†</sup> Present address: Department of Chemistry, Technical University of Denmark, Kemitorvet 207, Kgs. Lyngby, Denmark

\*Corresponding author

#### Contents

|                    |     |
|--------------------|-----|
| Compound 6: .....  | S3  |
| Compound 7: .....  | S5  |
| Compound 8: .....  | S7  |
| Compound 9: .....  | S9  |
| Compound 10: ..... | S11 |
| Compound 11: ..... | S13 |
| Compound 12: ..... | S15 |
| Compound 13: ..... | S17 |
| Compound 14: ..... | S19 |
| Compound 15: ..... | S21 |
| Compound 16: ..... | S23 |
| Compound 17: ..... | S25 |
| Compound 18: ..... | S27 |
| Compound 19: ..... | S29 |
| Compound 20: ..... | S31 |
| Compound 21: ..... | S33 |
| Compound 22: ..... | S35 |
| Compound 29: ..... | S37 |
| Compound 30: ..... | S39 |
| Compound 31: ..... | S41 |
| Compound 32: ..... | S43 |
| Compound 33: ..... | S45 |
| Compound 34: ..... | S47 |
| Compound 35: ..... | S49 |

|              |     |
|--------------|-----|
| Compound 36: | S51 |
| Compound 1:  | S53 |
| Compound 2:  | S55 |
| Compound 40: | S57 |
| Compound 41: | S59 |
| Compound 42: | S61 |
| Compound 43: | S63 |
| Compound 44: | S65 |
| Compound 45: | S67 |
| Compound 50: | S69 |
| Compound 51: | S71 |
| Compound 52: | S73 |
| Compound 55: | S75 |
| Compound 56: | S77 |
| Compound 57: | S80 |
| Compound 57: | S82 |
| Compound 46: | S83 |
| Compound 52: | S85 |
| Compound 59: | S87 |
| Compound 59: | S89 |

Compound 6:  
<sup>1</sup>H NMR

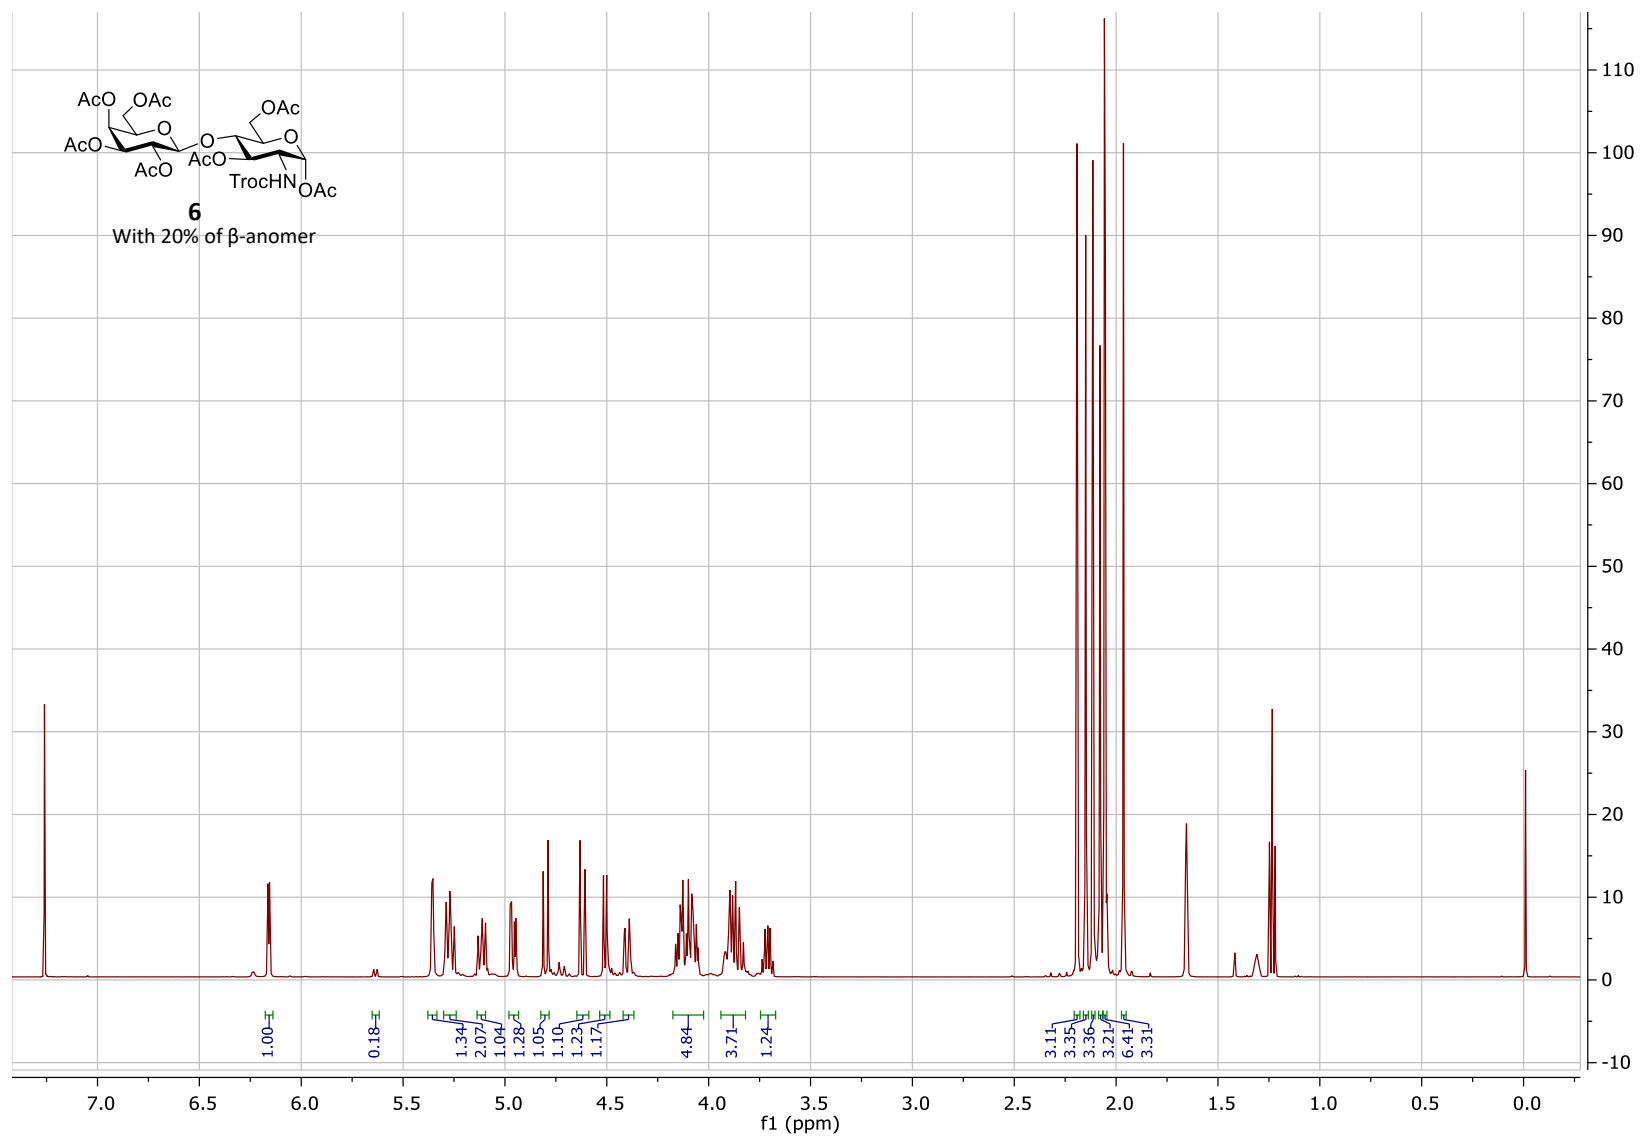

Compound 6:  
<sup>13</sup>C NMR

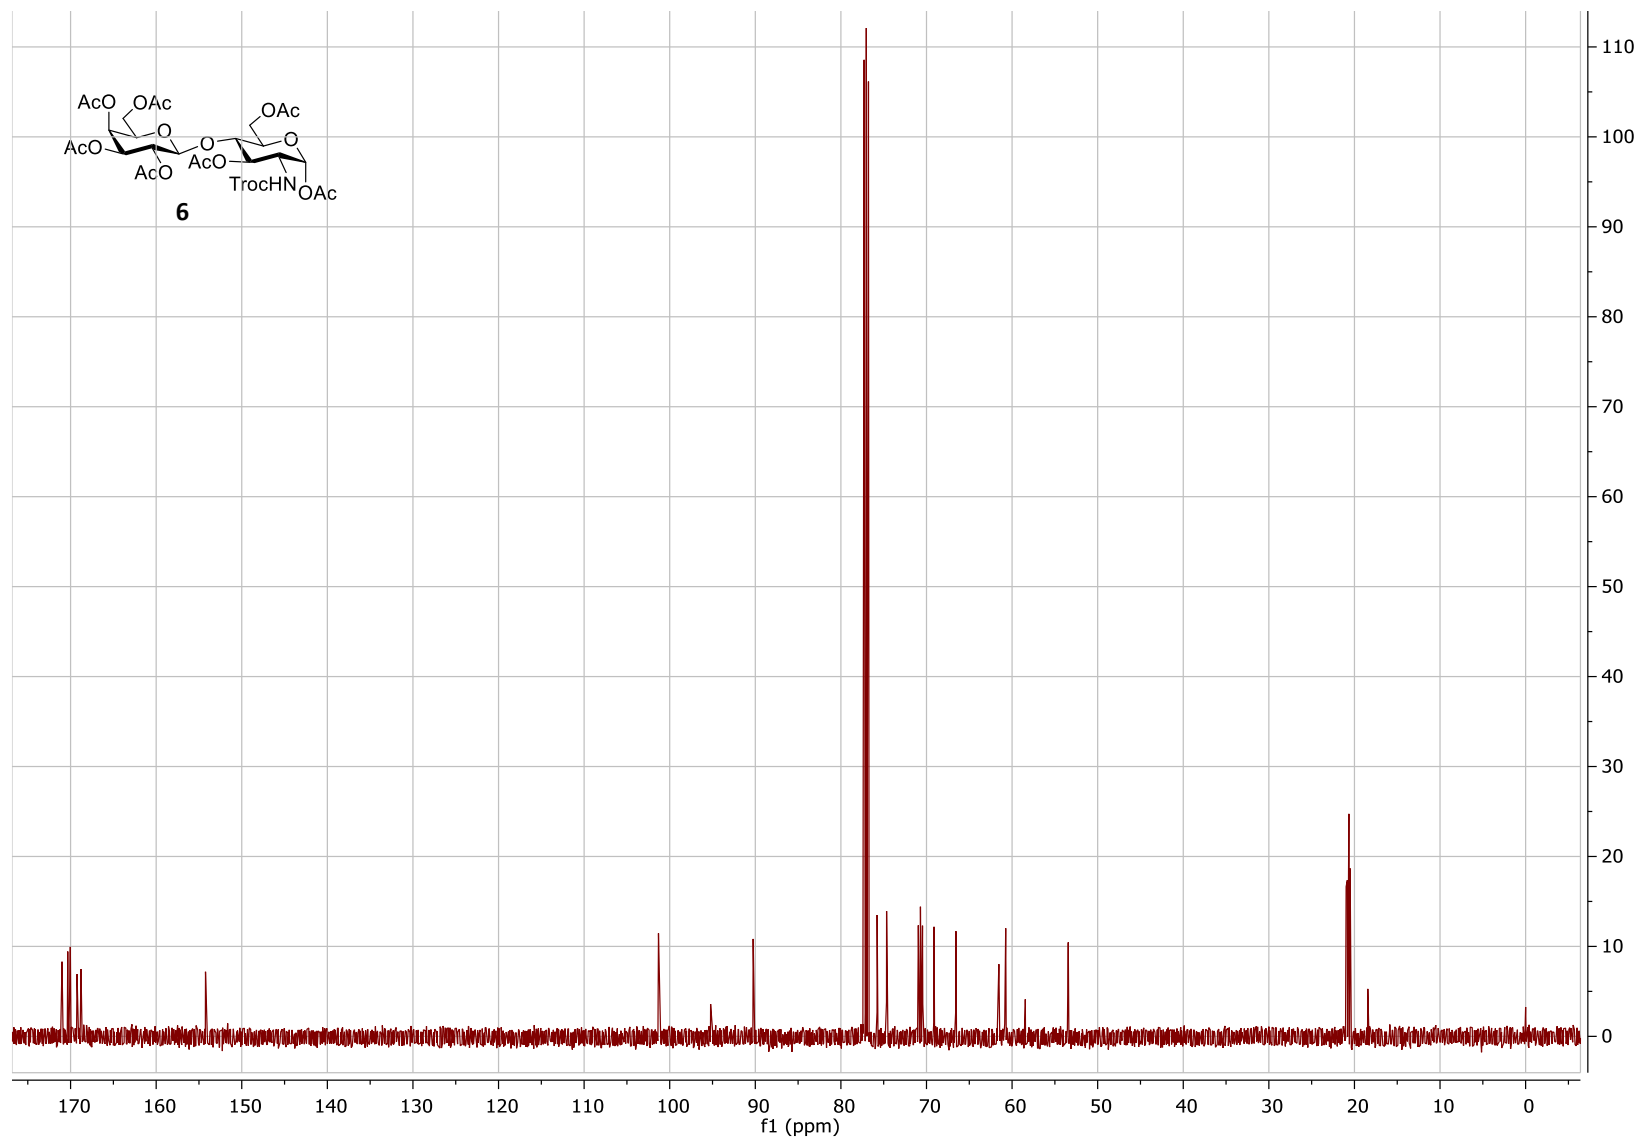

Compound 7:  
<sup>1</sup>H NMR

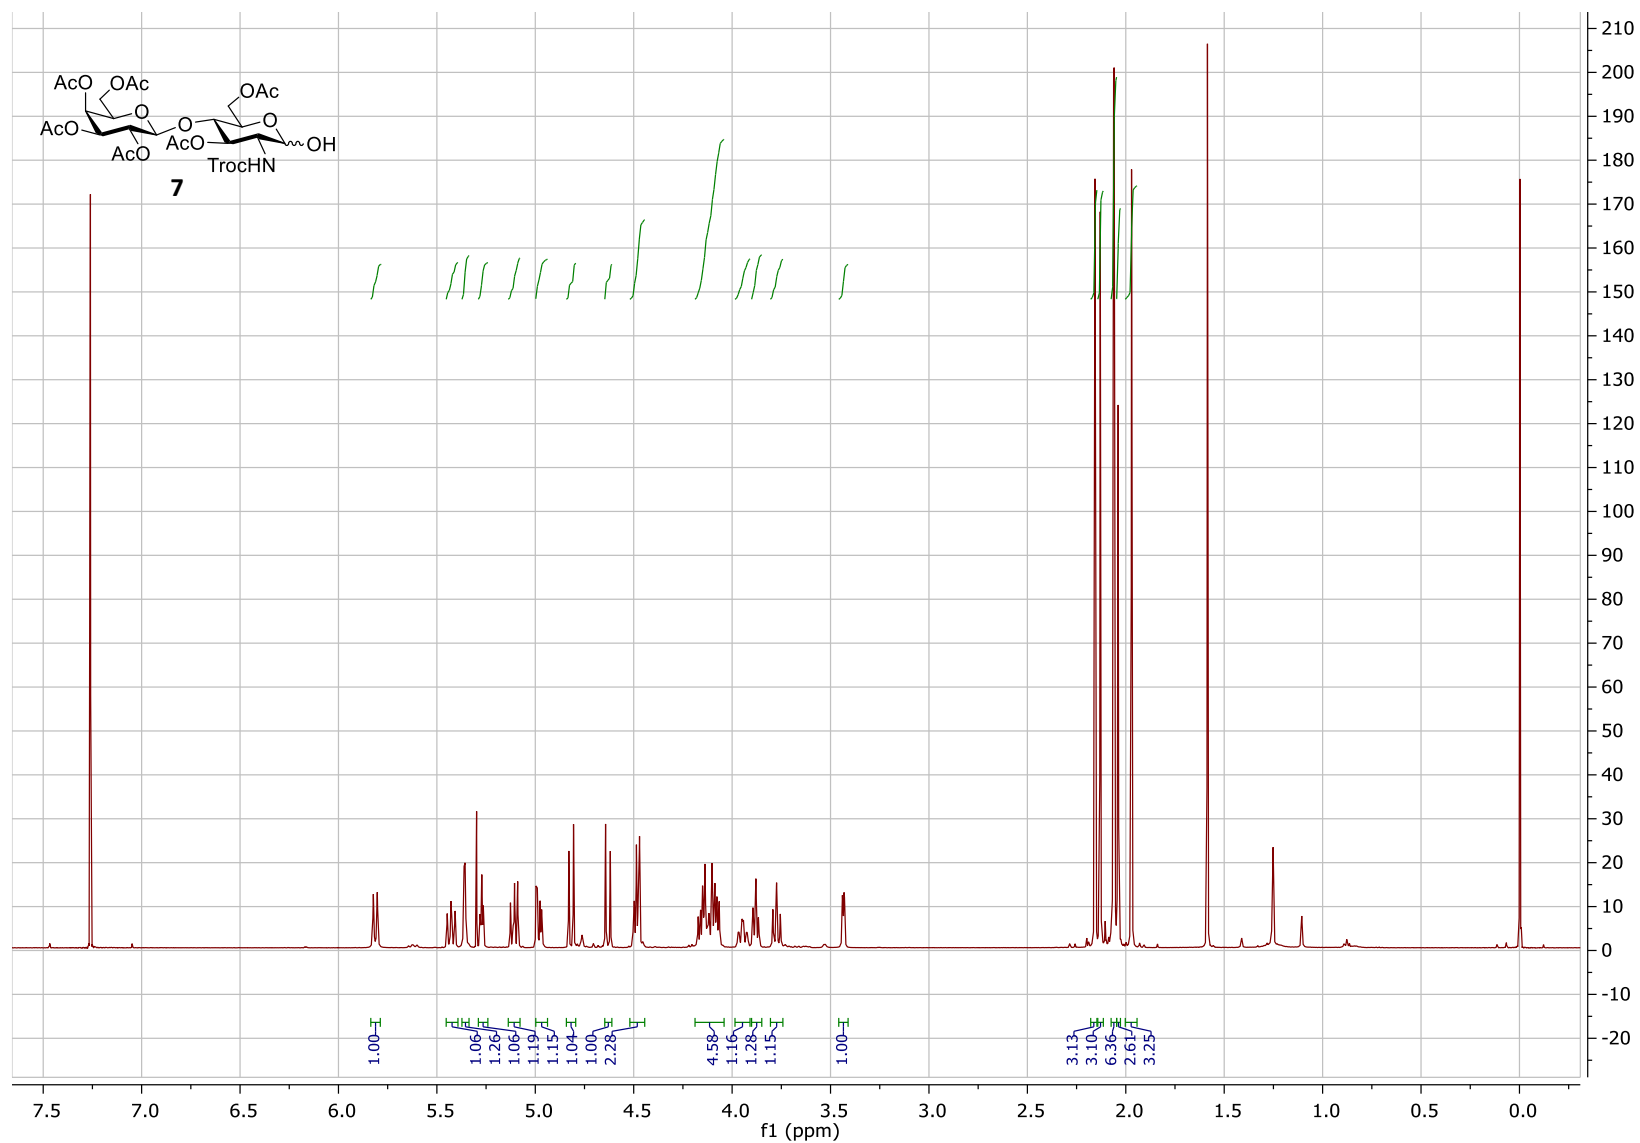

Compound 7:  
<sup>13</sup>C NMR

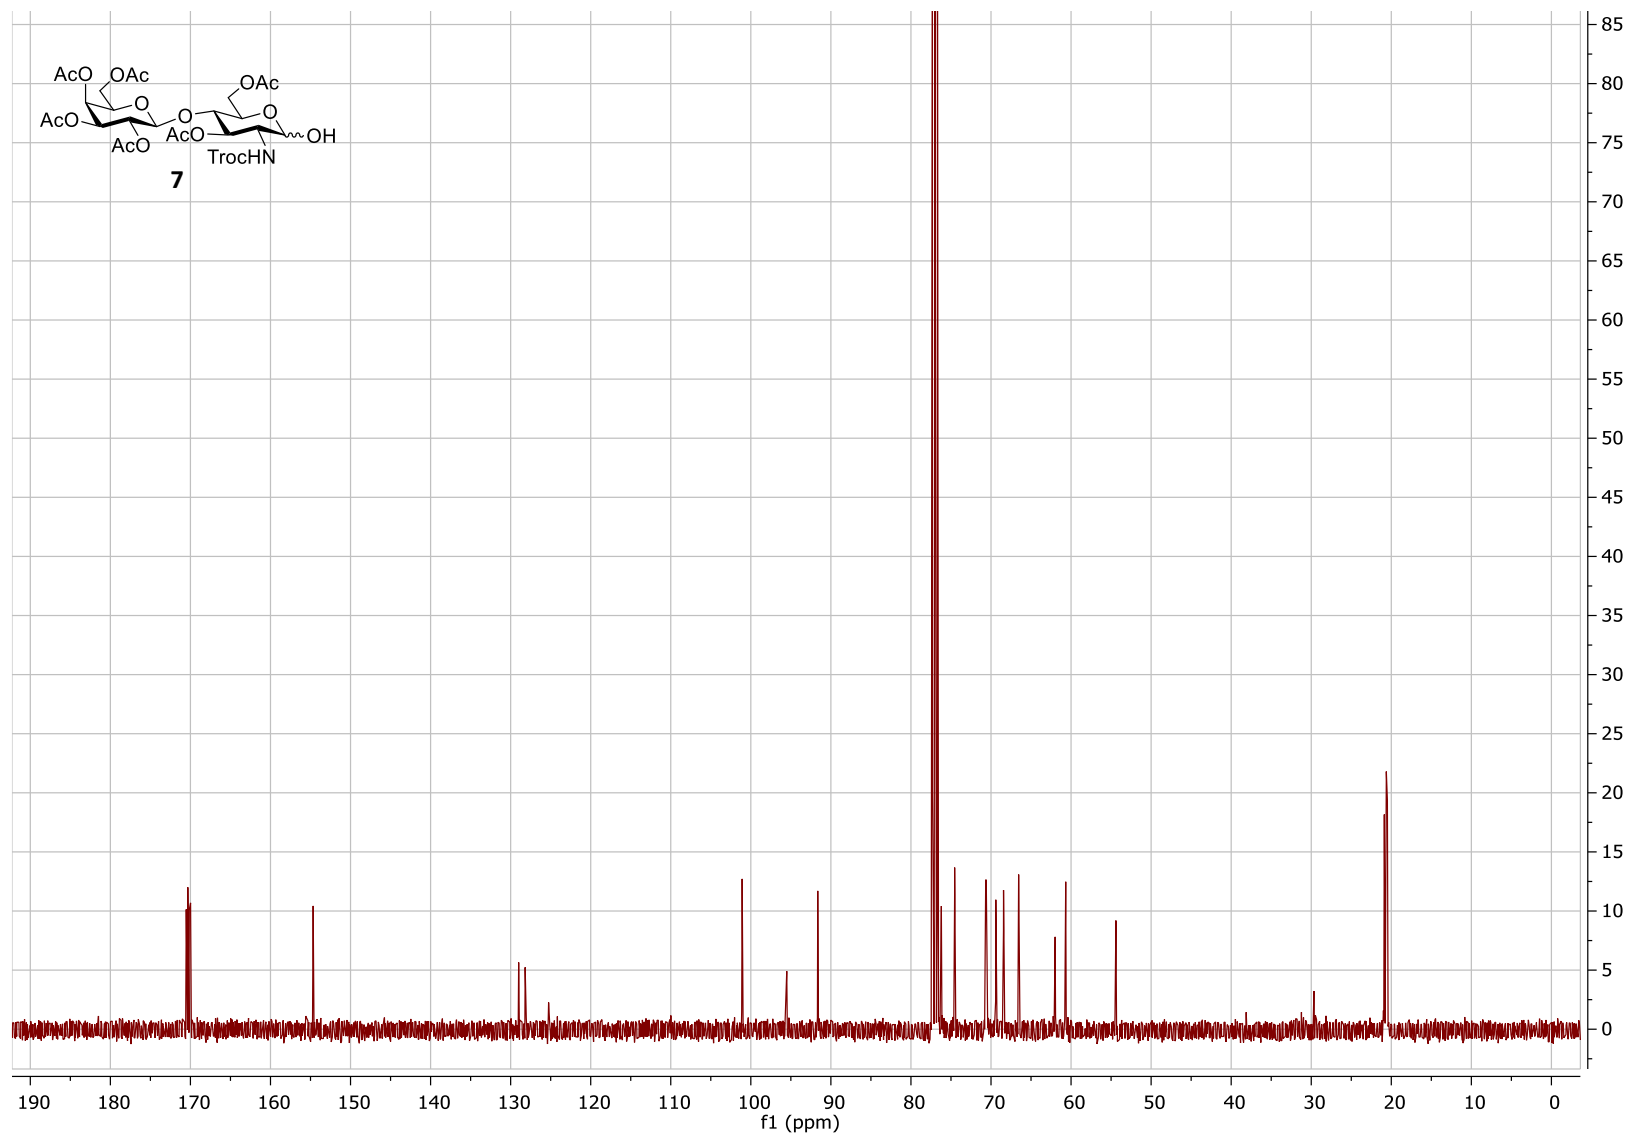

Compound 8:  
<sup>1</sup>H NMR

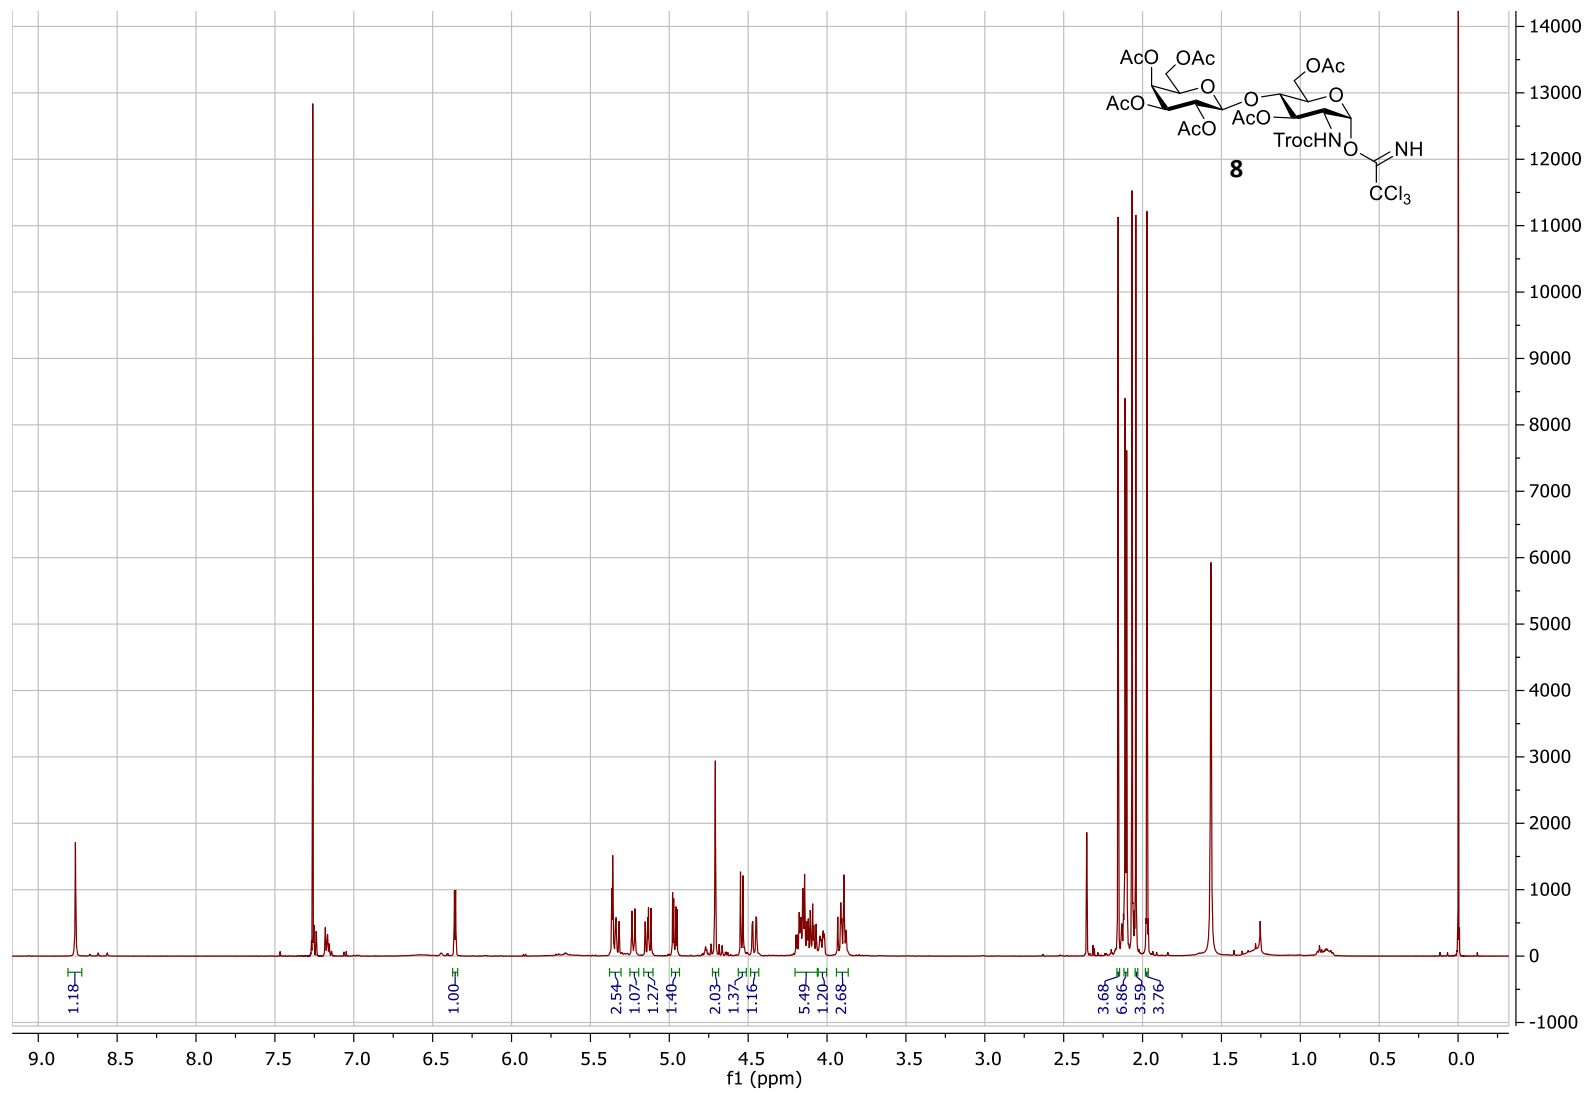

Compound **8**:  
<sup>13</sup>C NMR

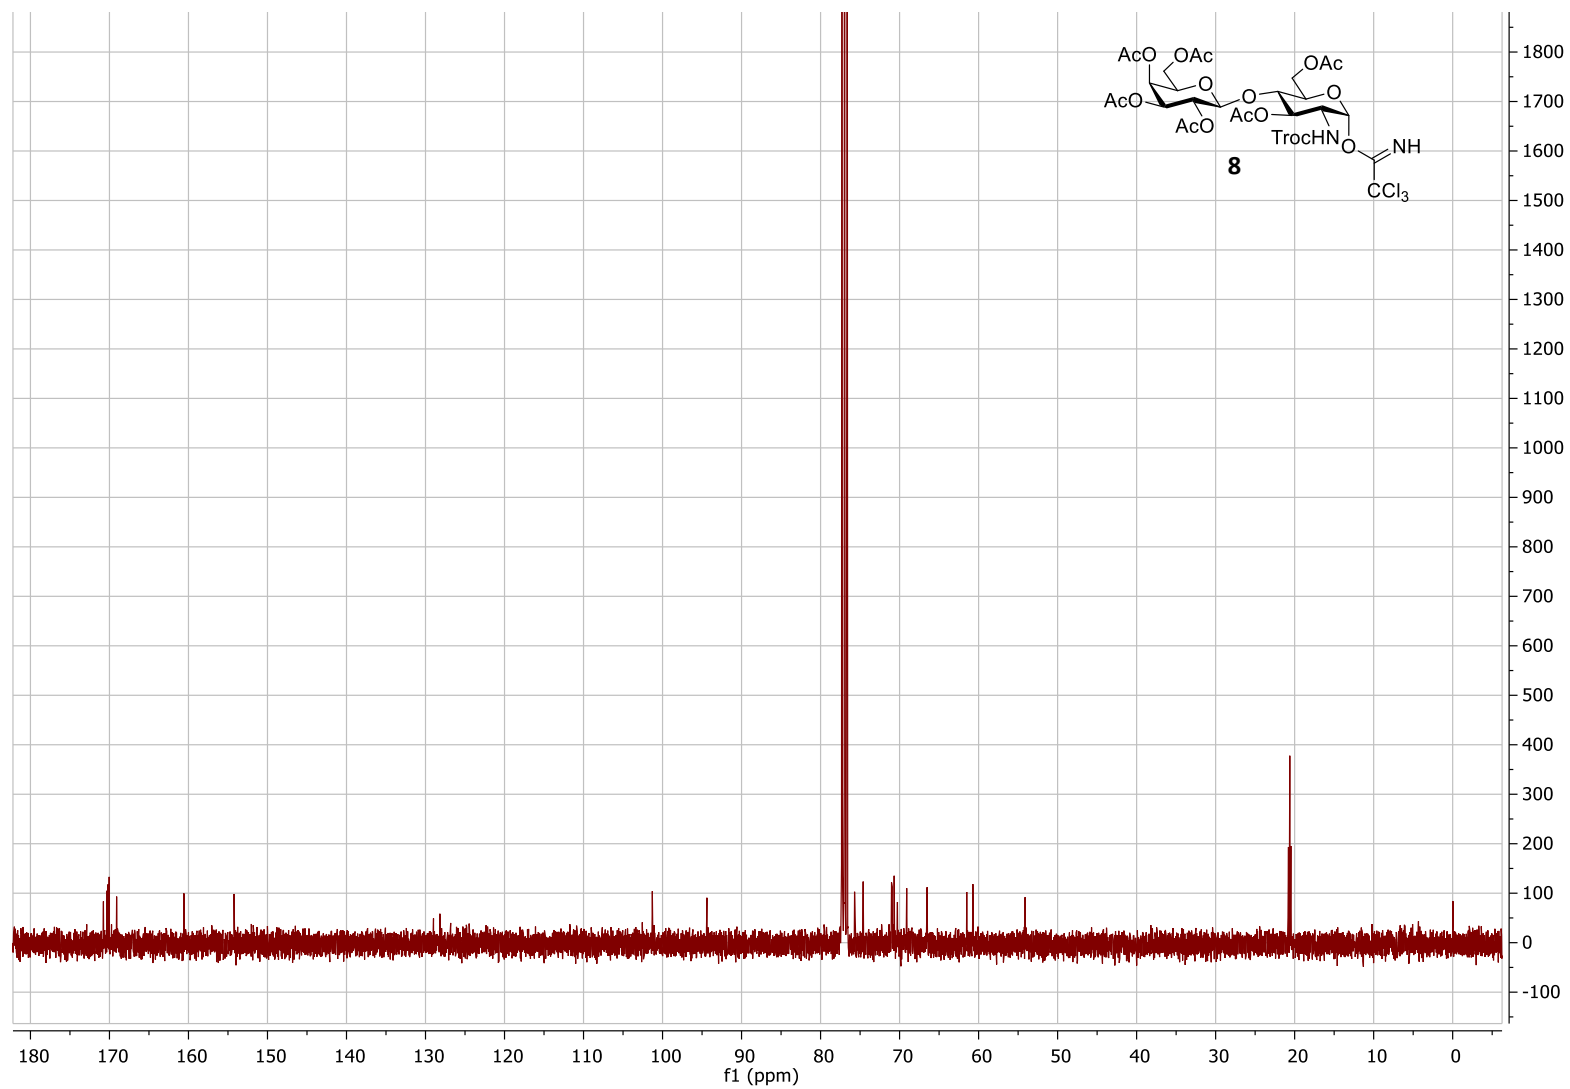



Compound 9:  
<sup>1</sup>H NMR

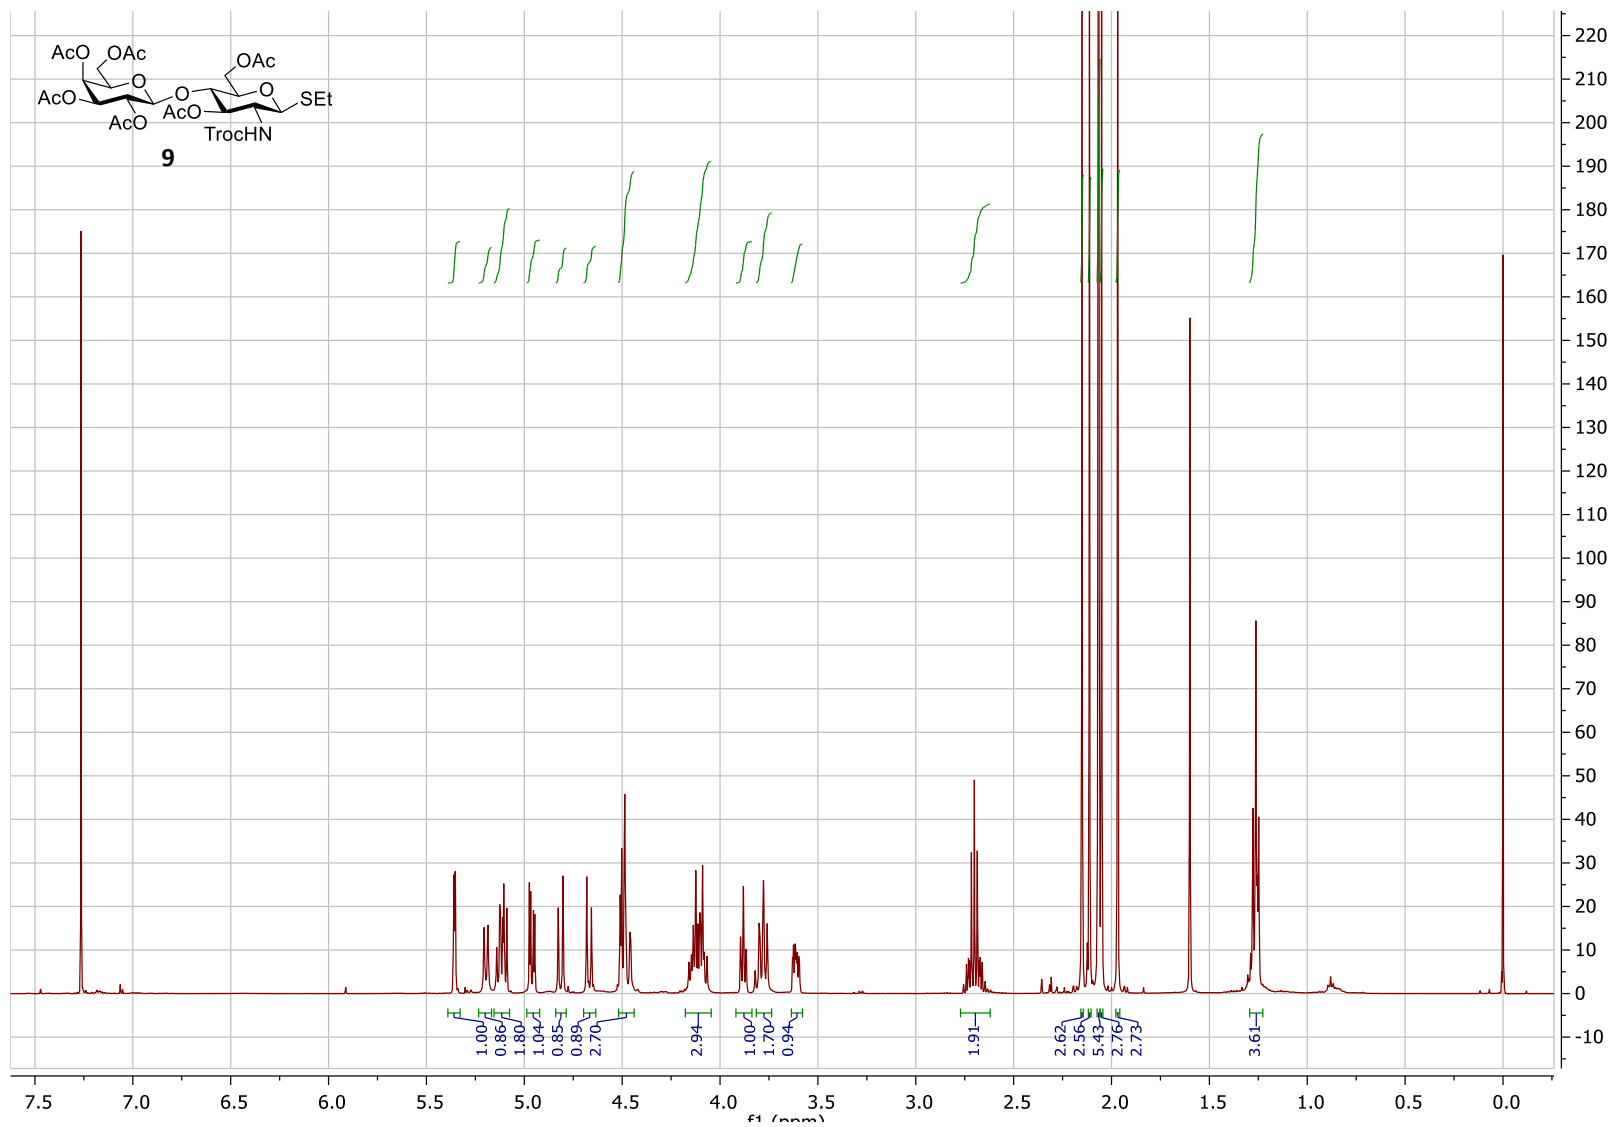

Compound **9**:  
<sup>13</sup>C NMR

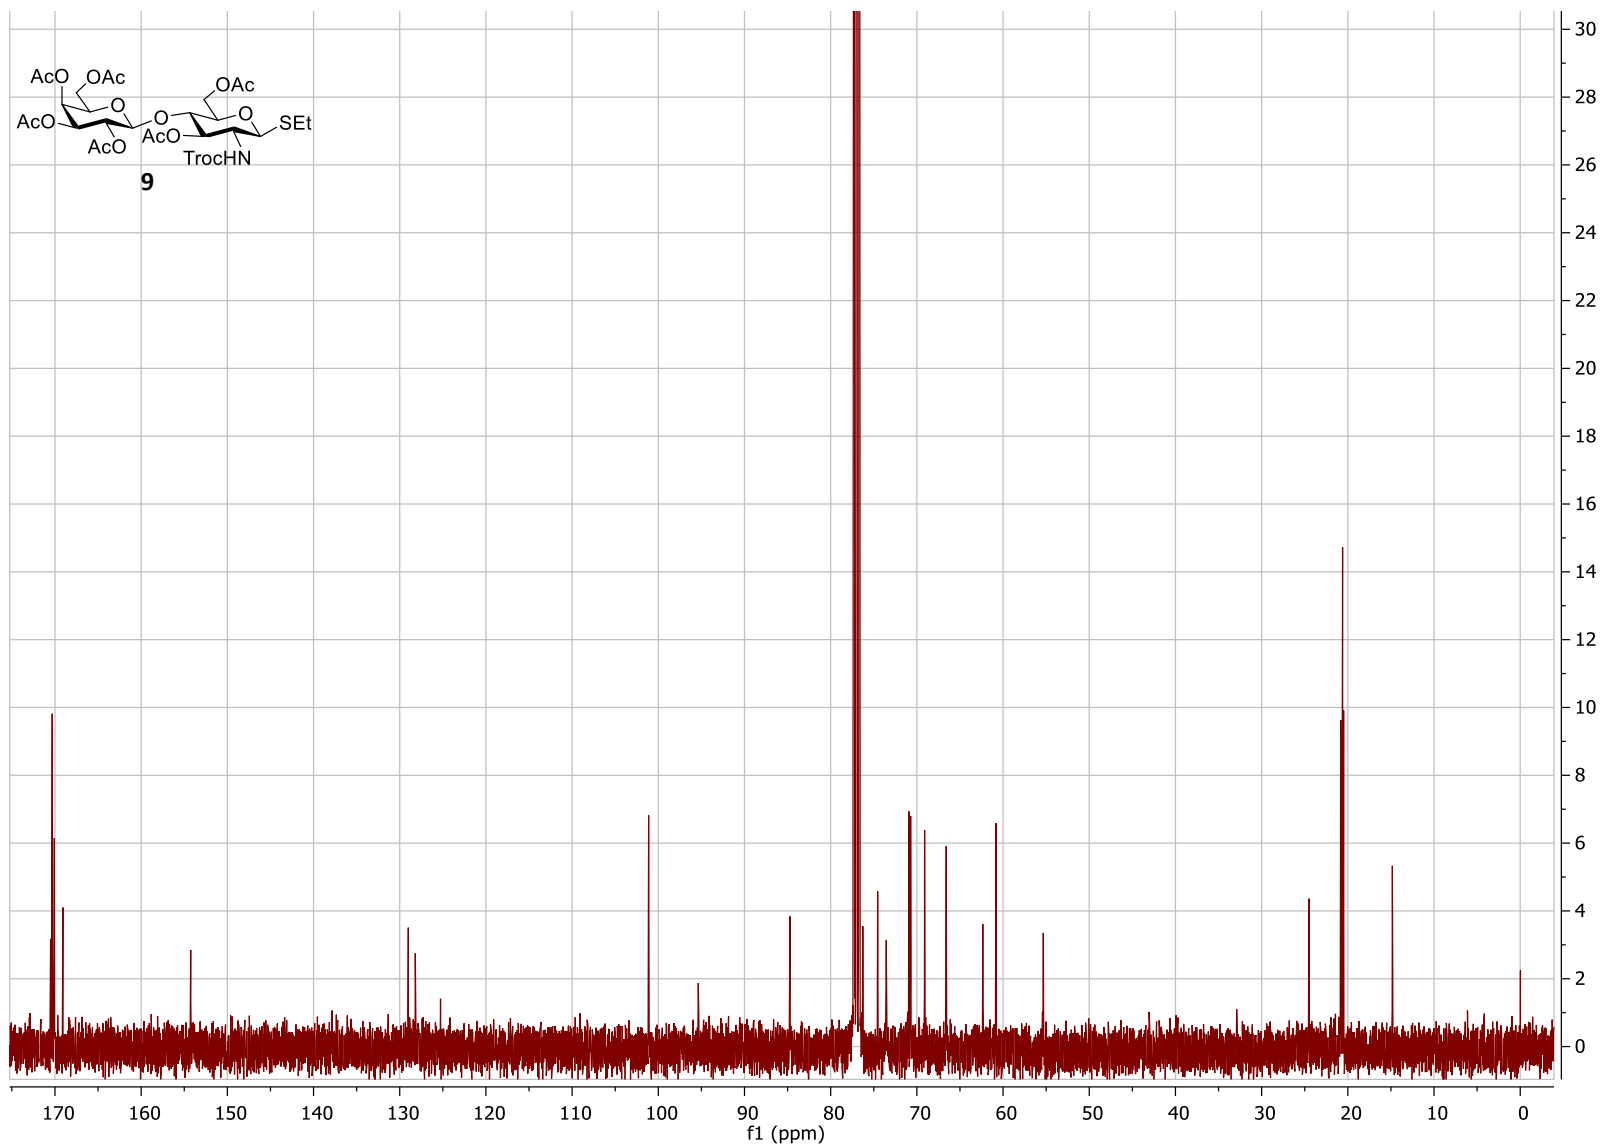

Compound **10**:  
<sup>1</sup>H NMR

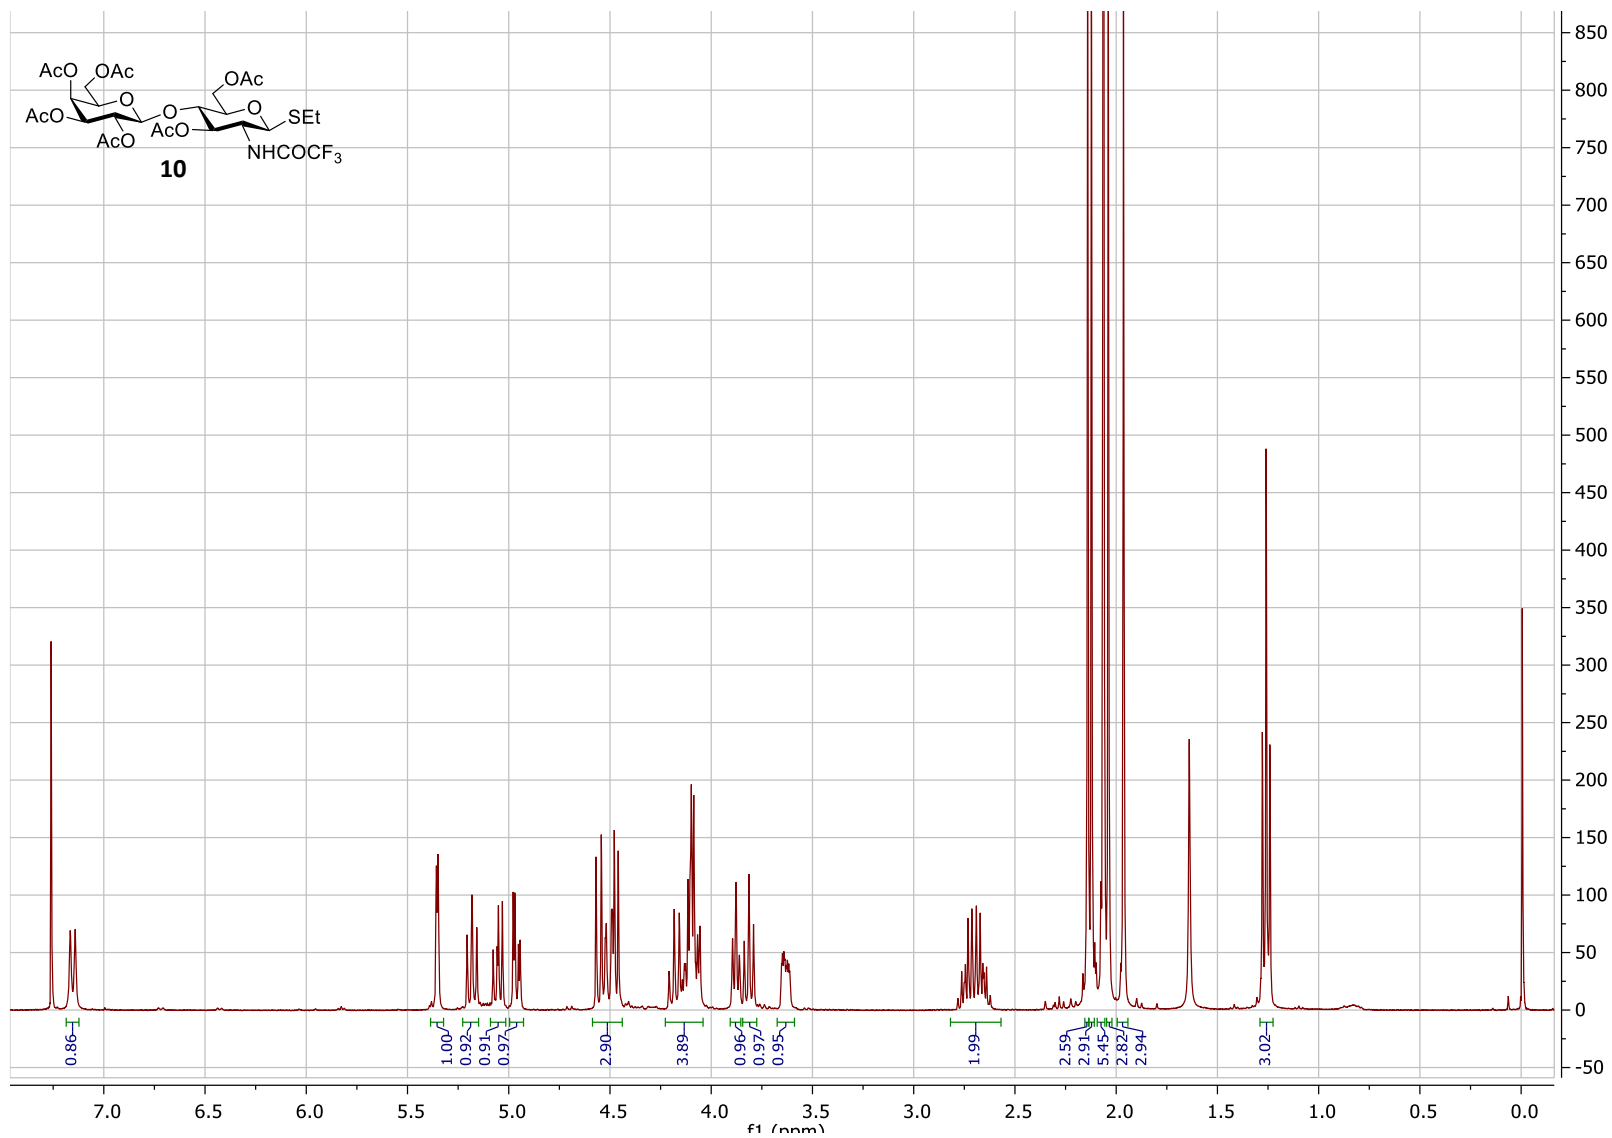

Compound **10**:  
<sup>13</sup>C NMR

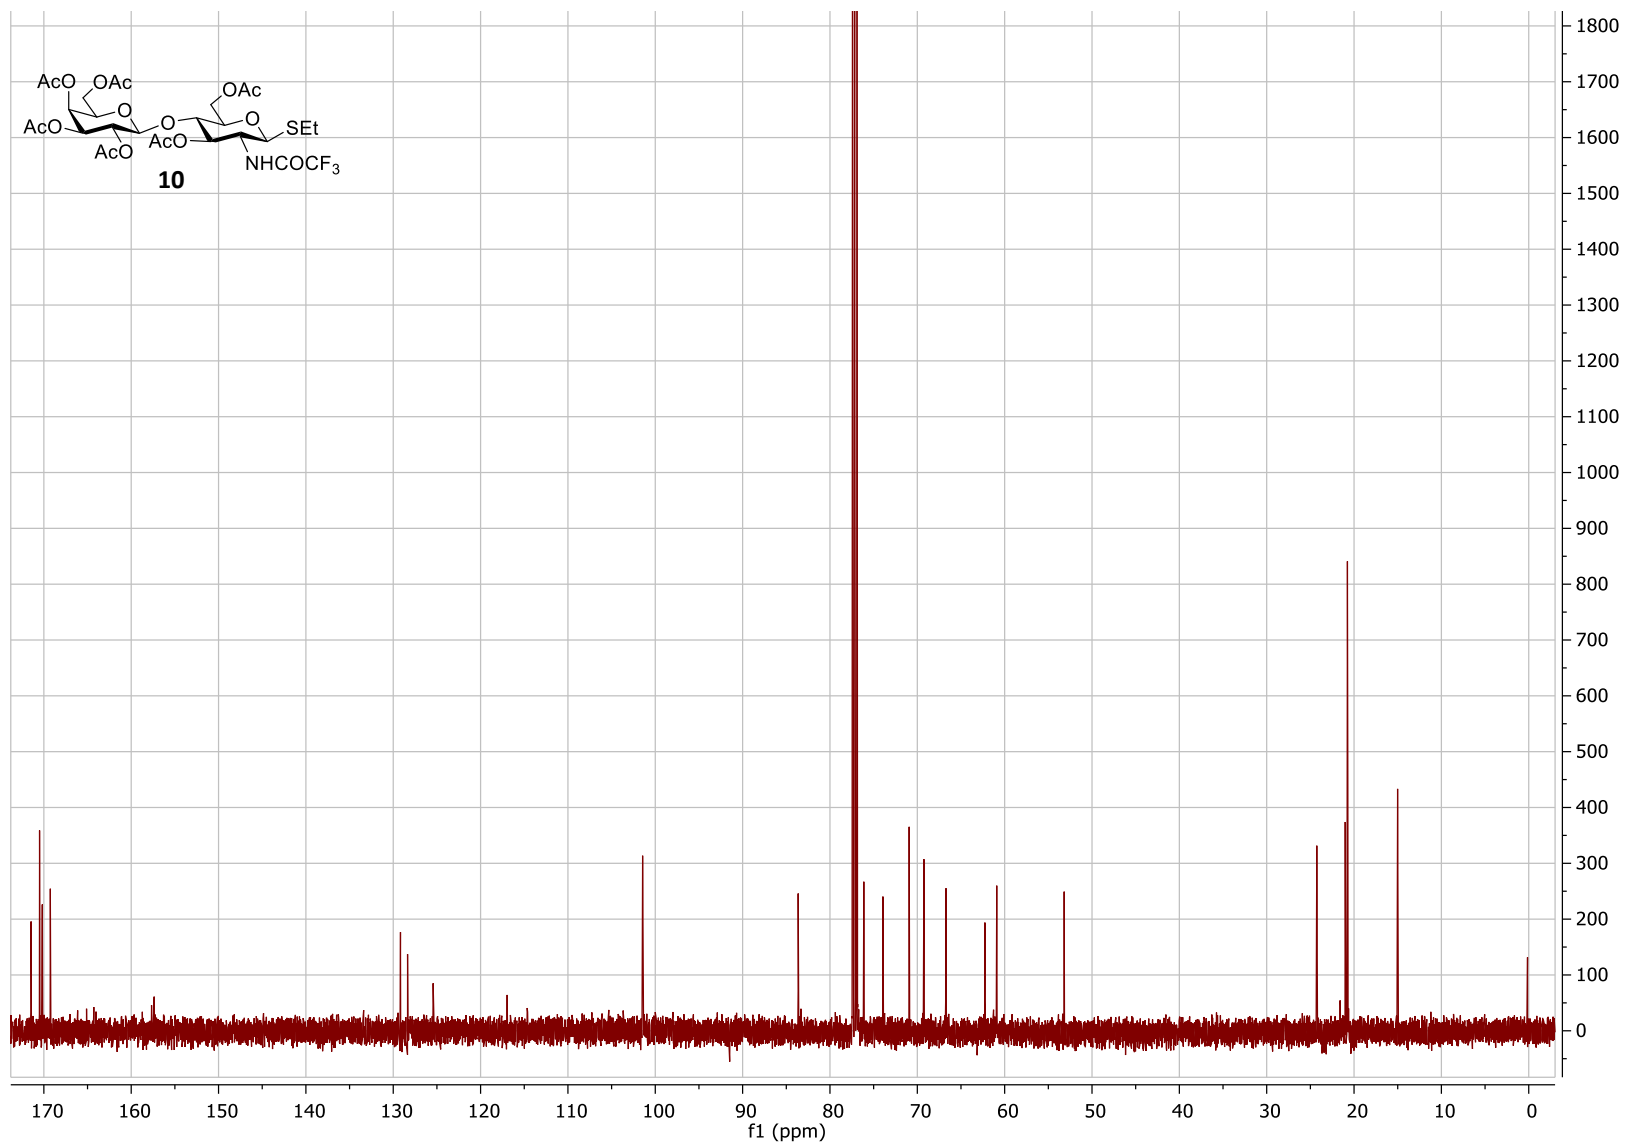

Compound **11**:  
<sup>1</sup>H NMR

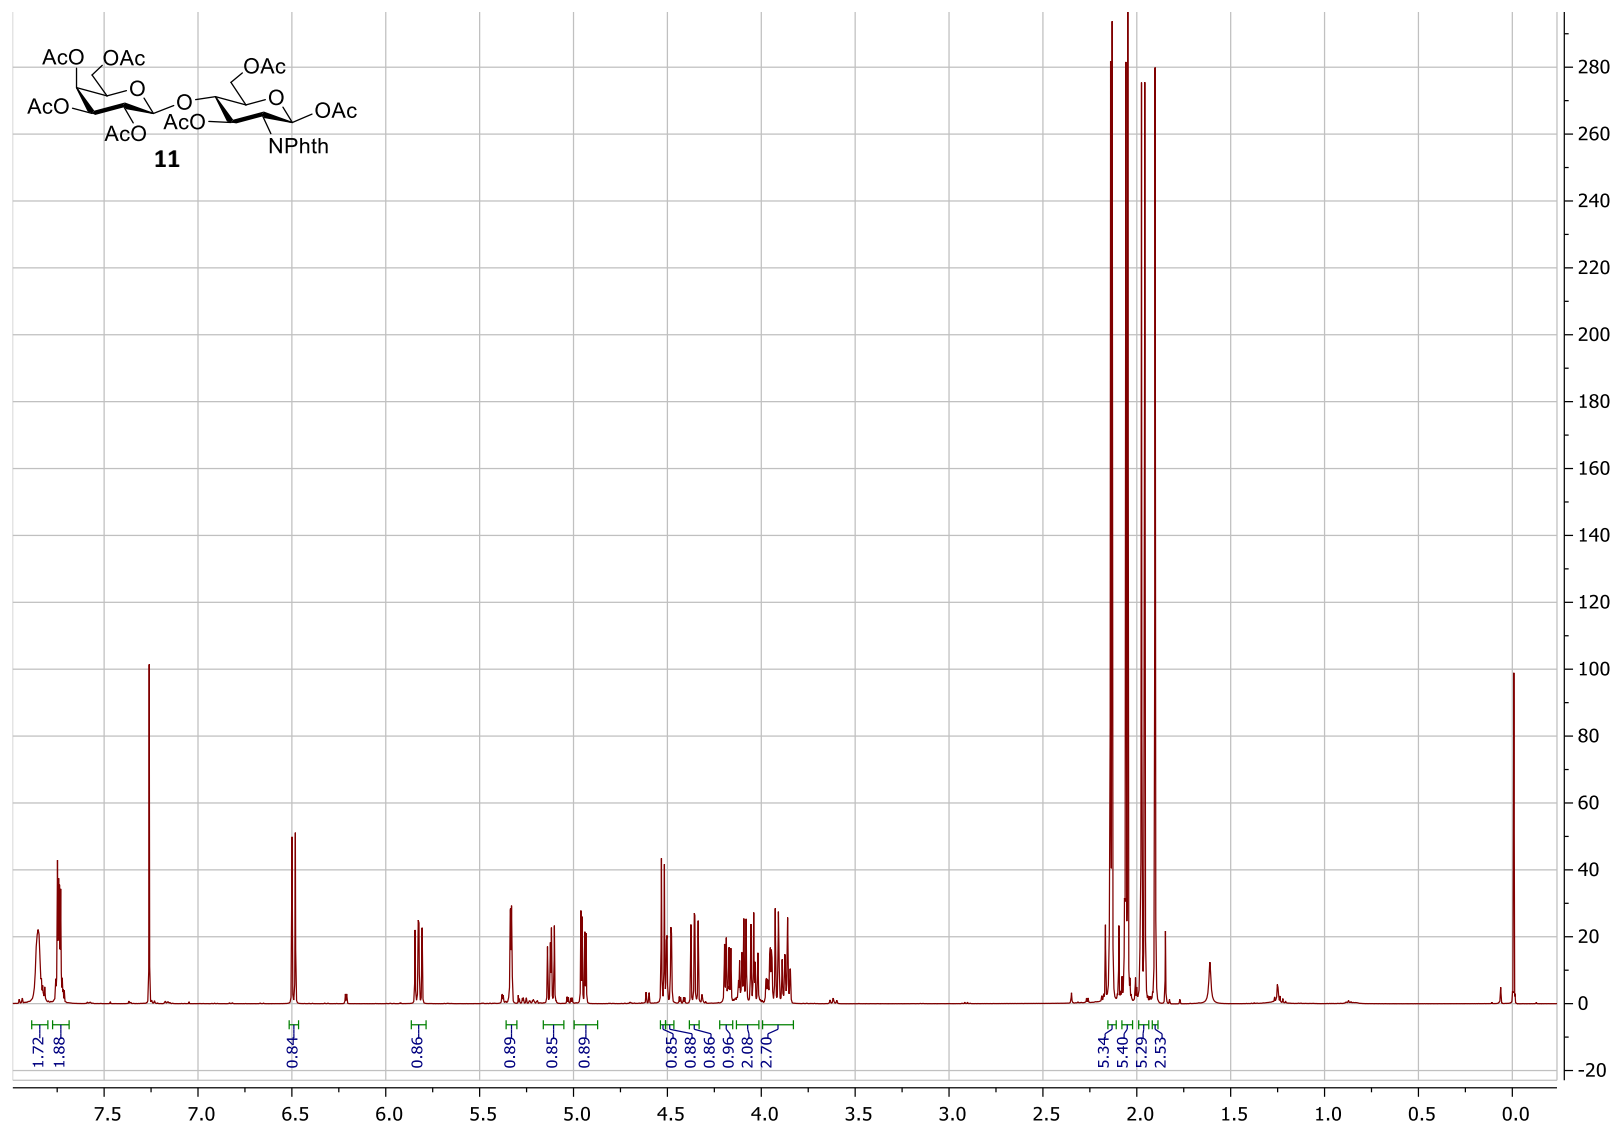

Compound **11**:  
<sup>13</sup>C NMR

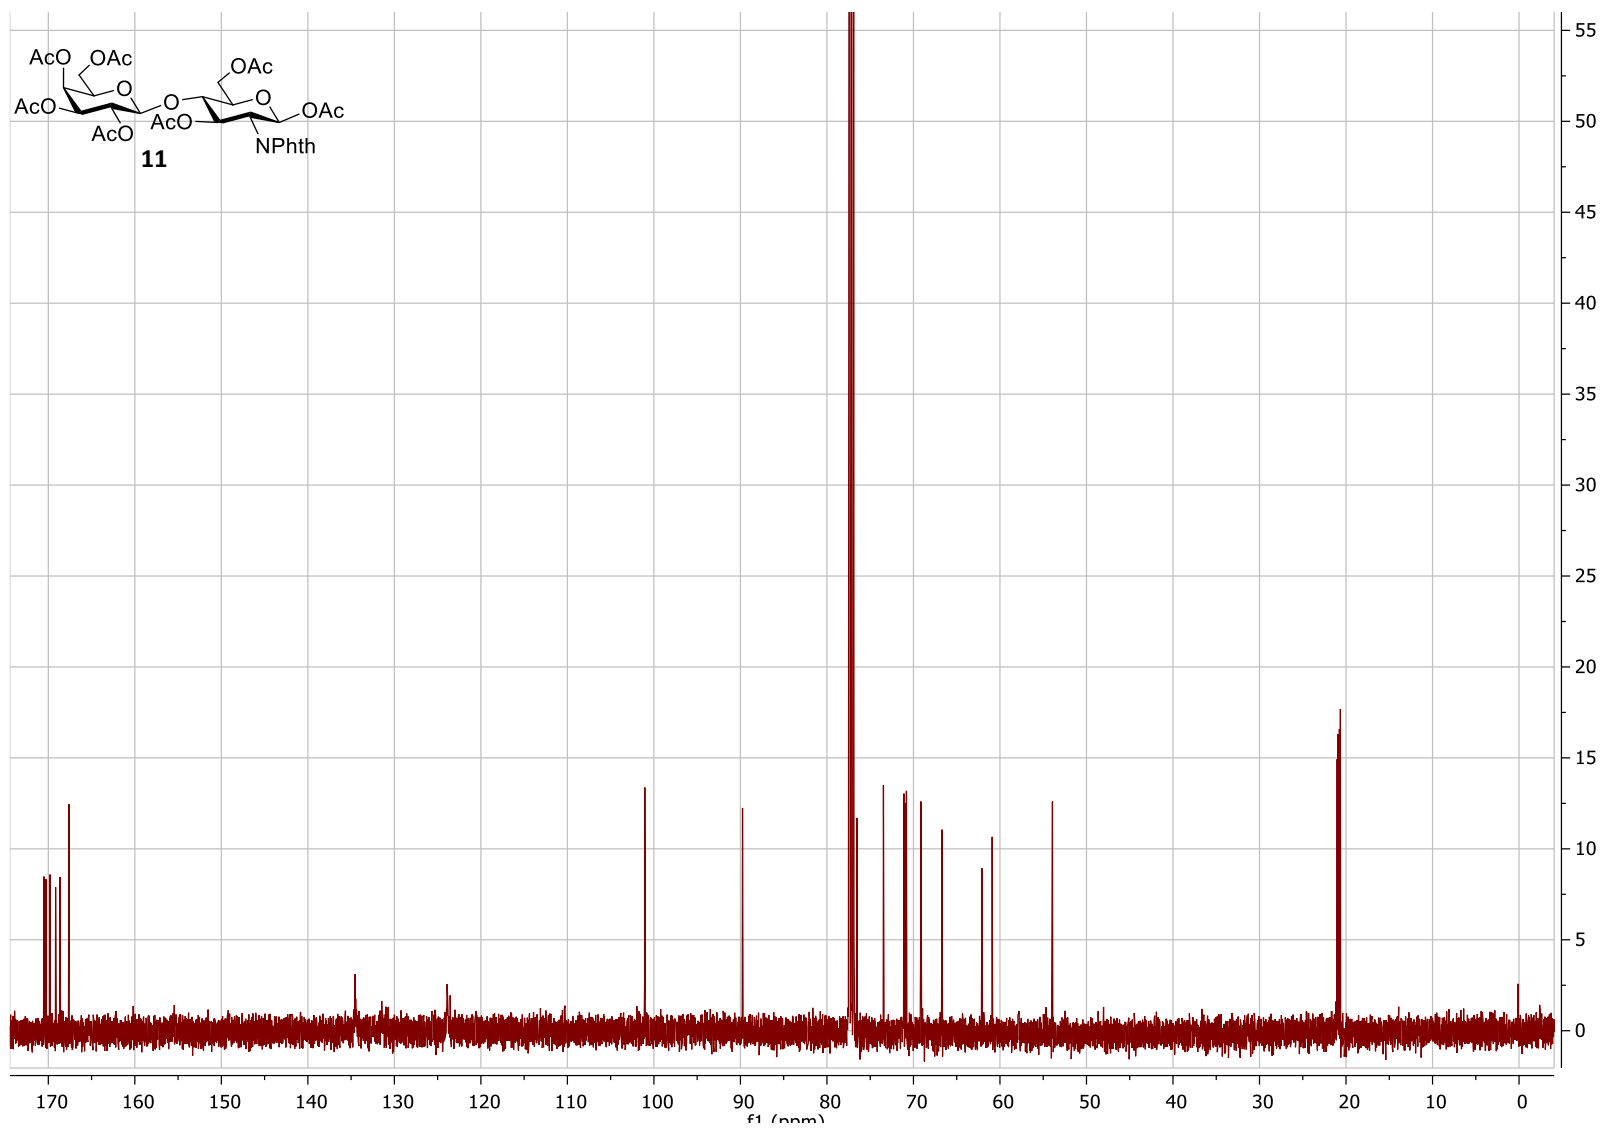

Compound **12**:  
<sup>1</sup>H NMR

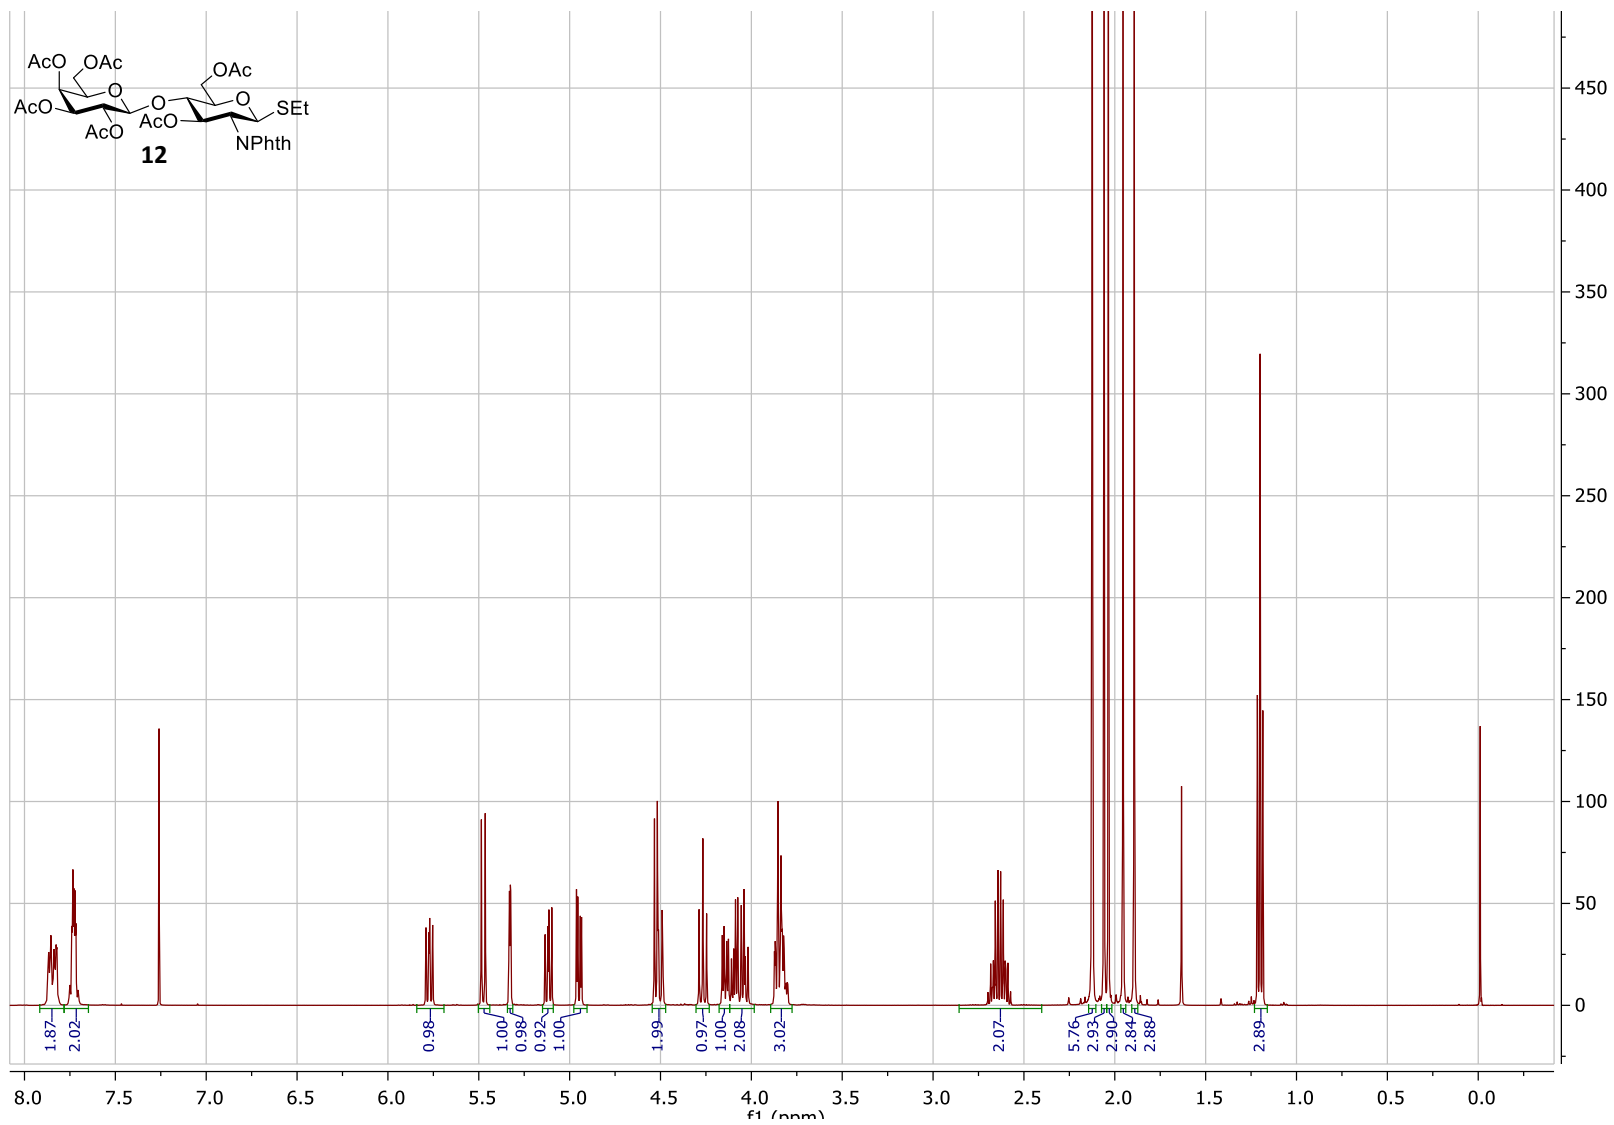

Compound **12**:  
<sup>13</sup>C NMR

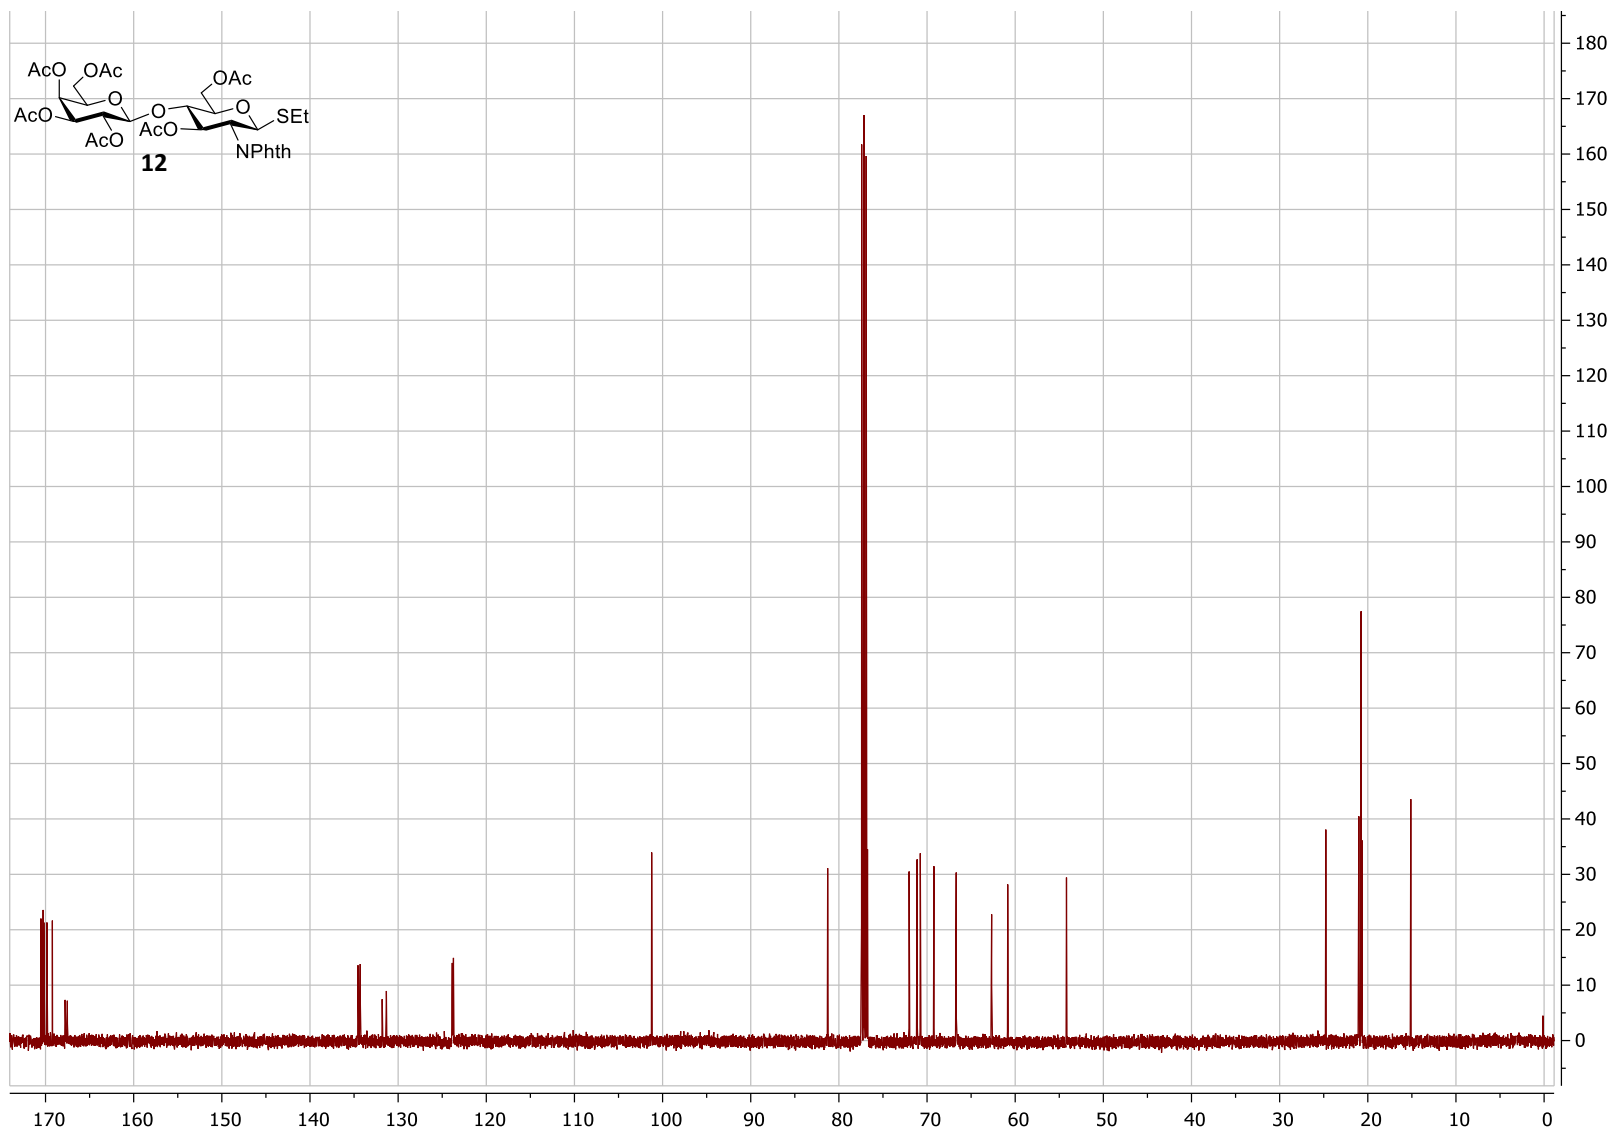



Compound **13**:  
<sup>1</sup>H NMR

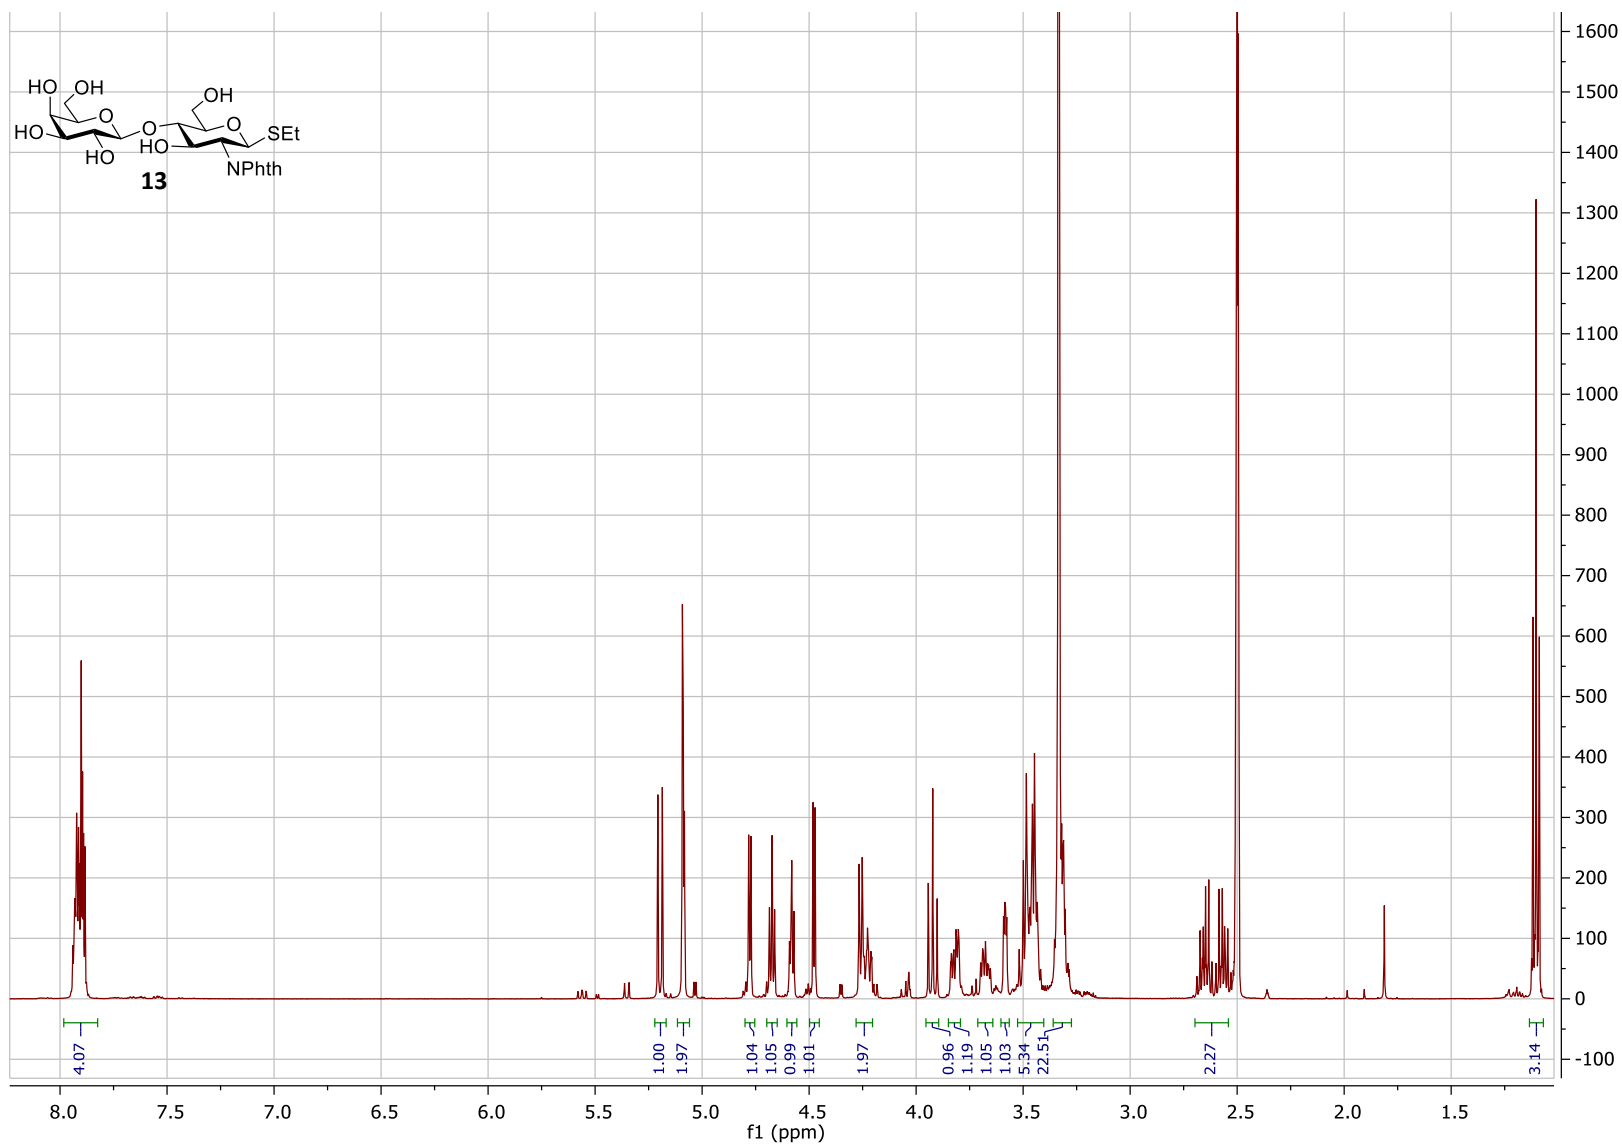

Compound **13**:  
<sup>13</sup>C NMR

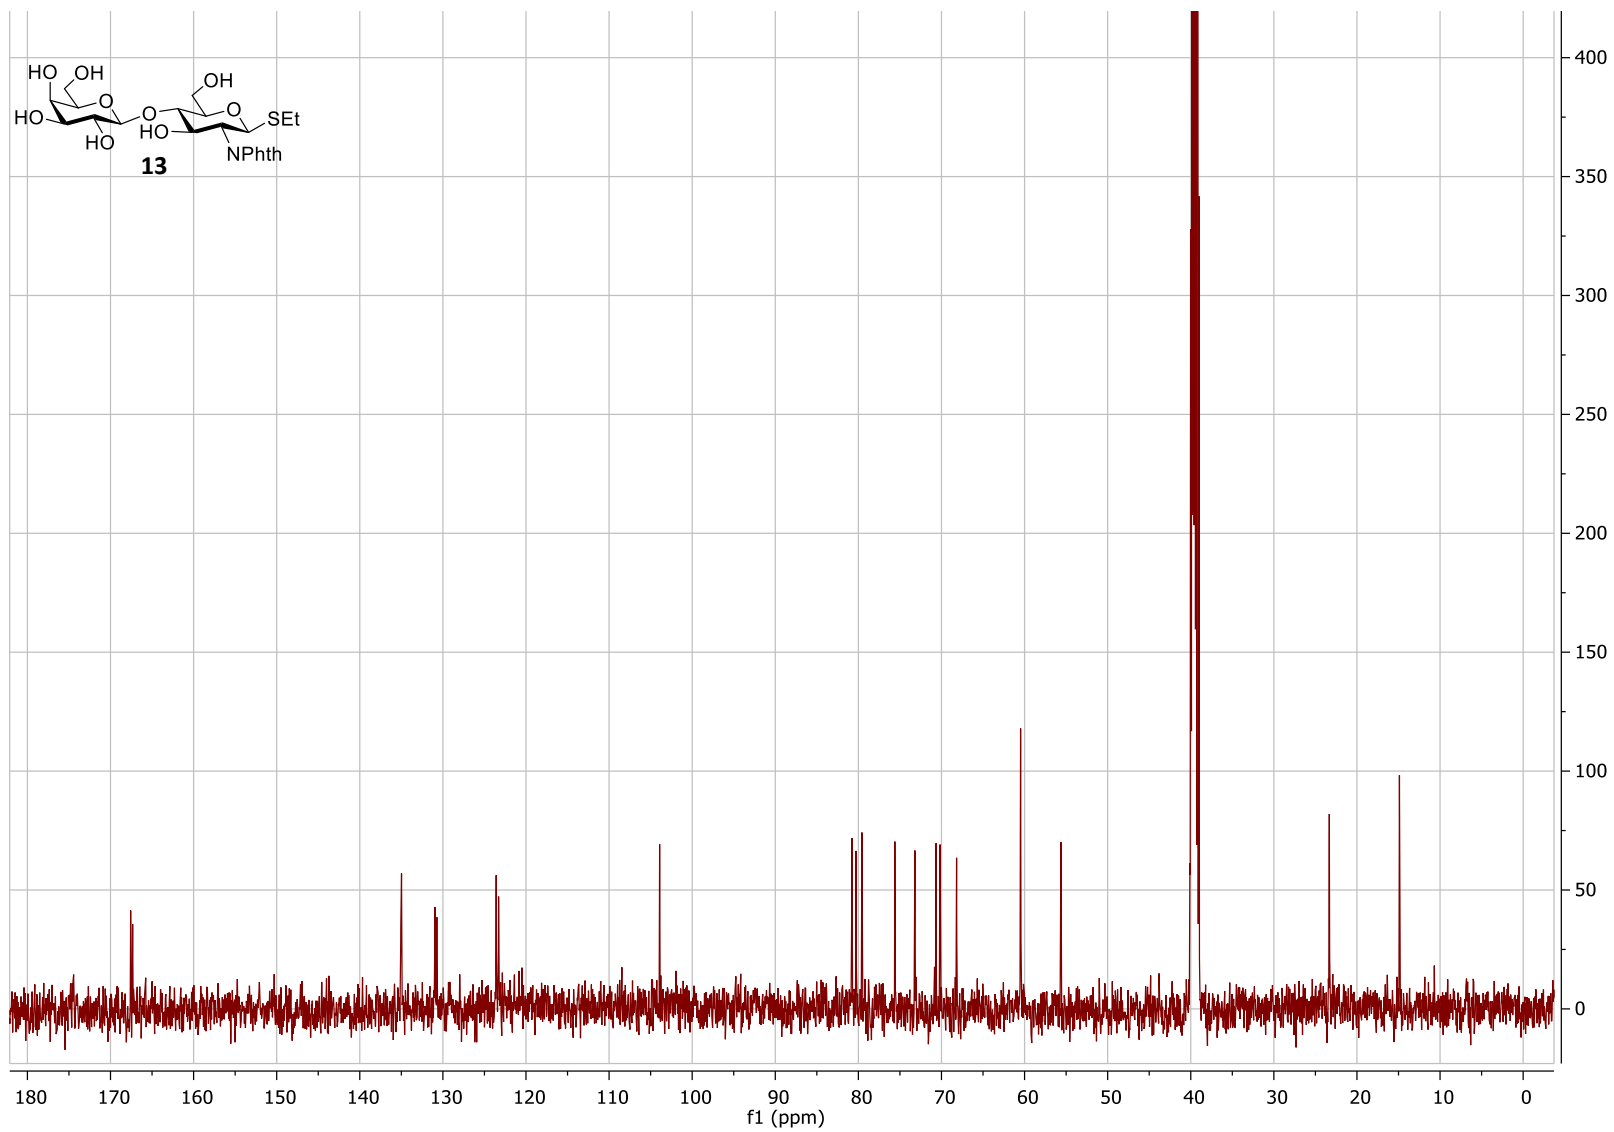

Compound **14**:  
<sup>1</sup>H NMR

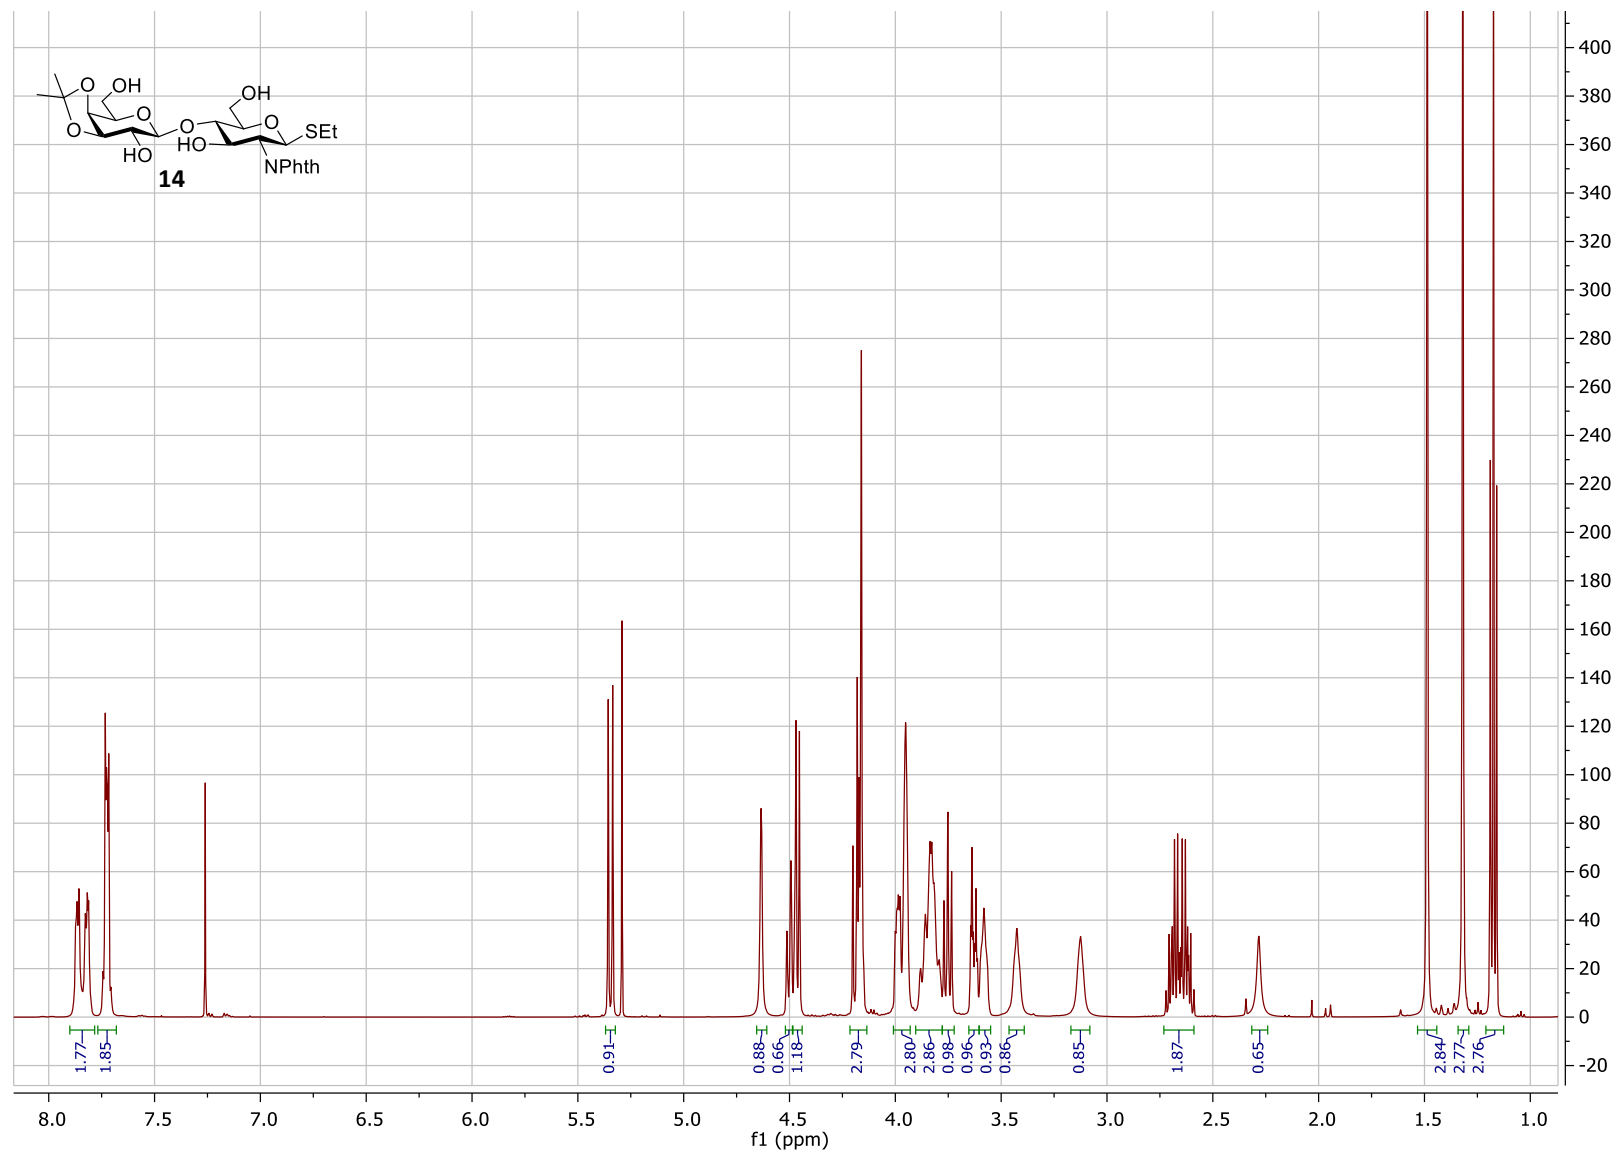

Compound **14**:  
<sup>13</sup>C NMR

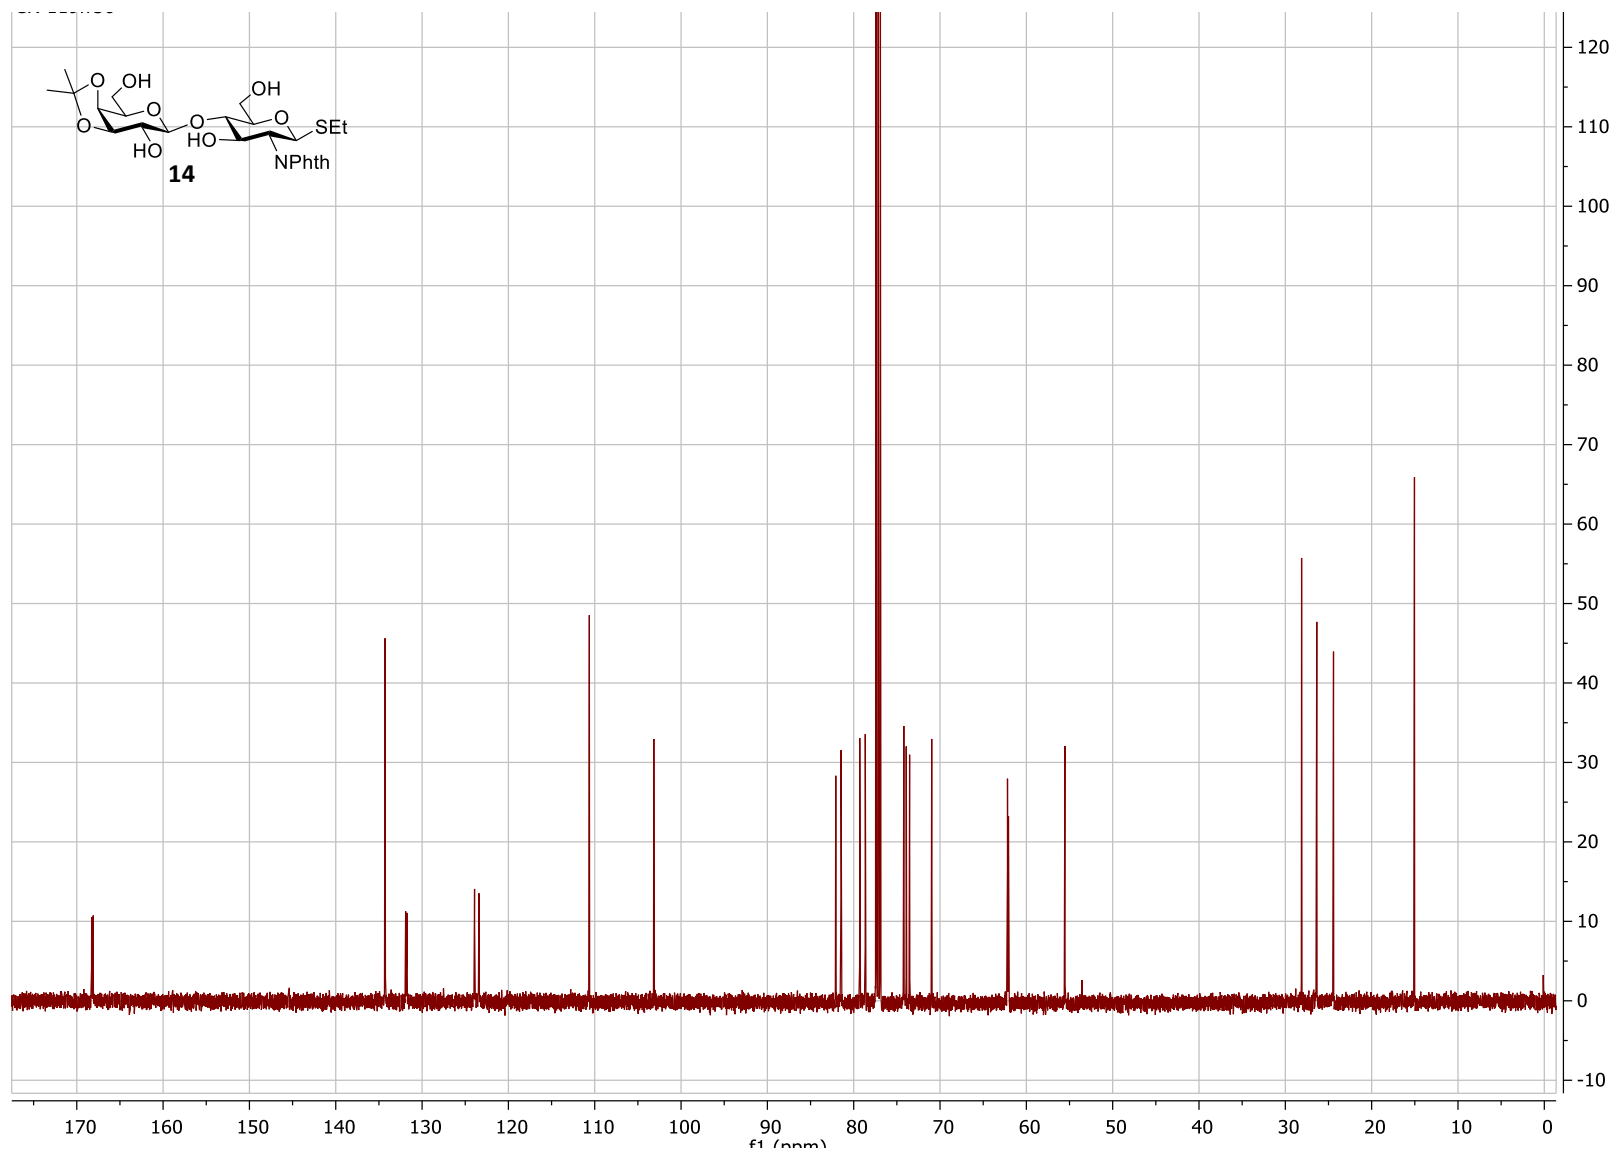

Compound **15**:  
<sup>1</sup>H NMR

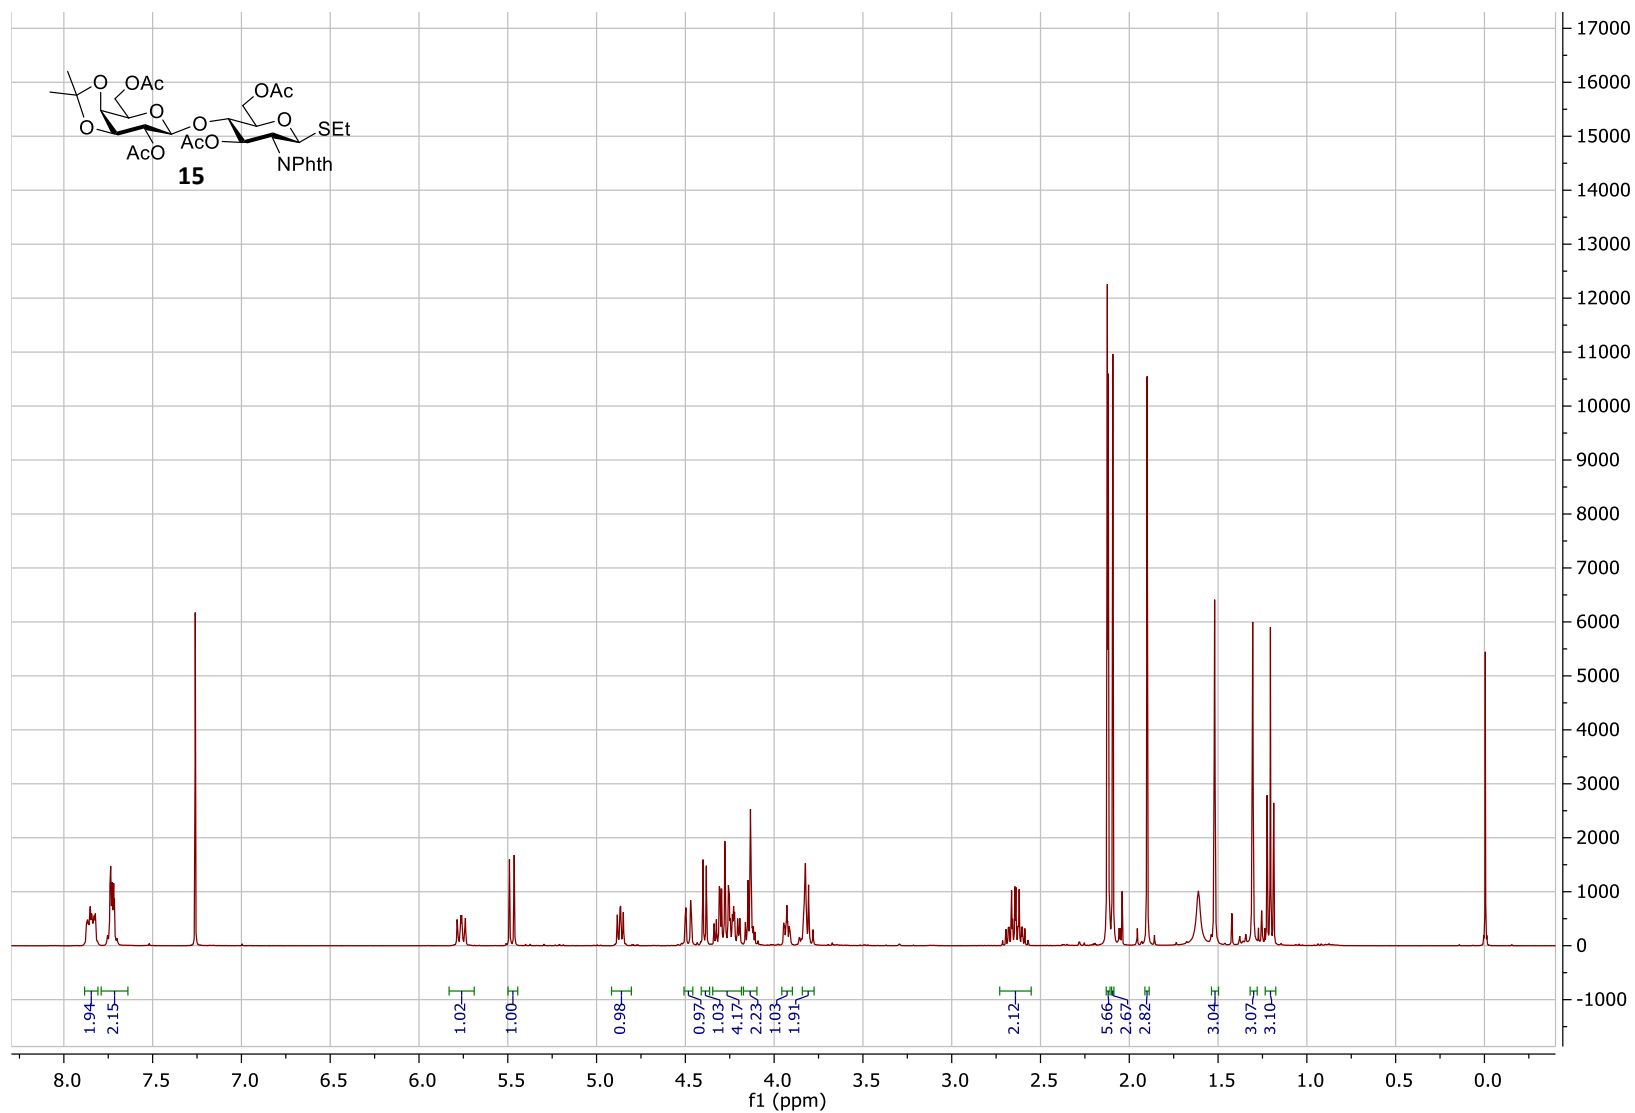

Compound **15**:  
<sup>13</sup>C NMR

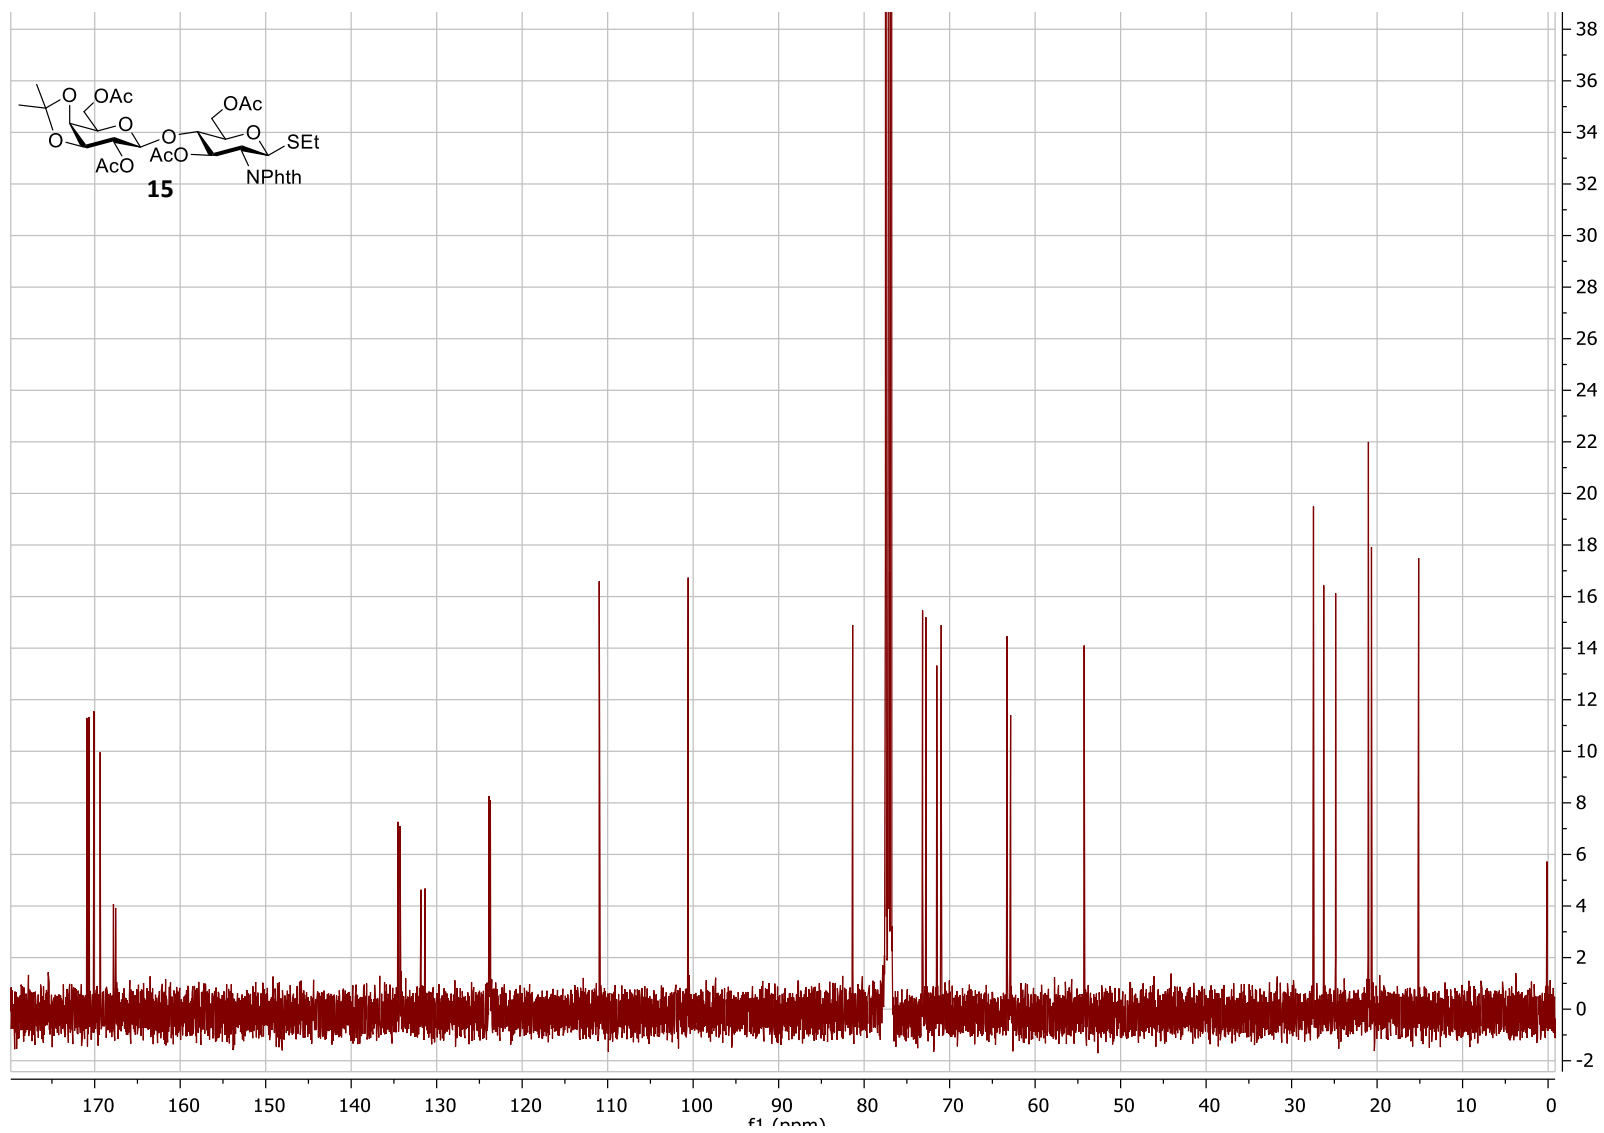

Compound **16**:  
<sup>1</sup>H NMR

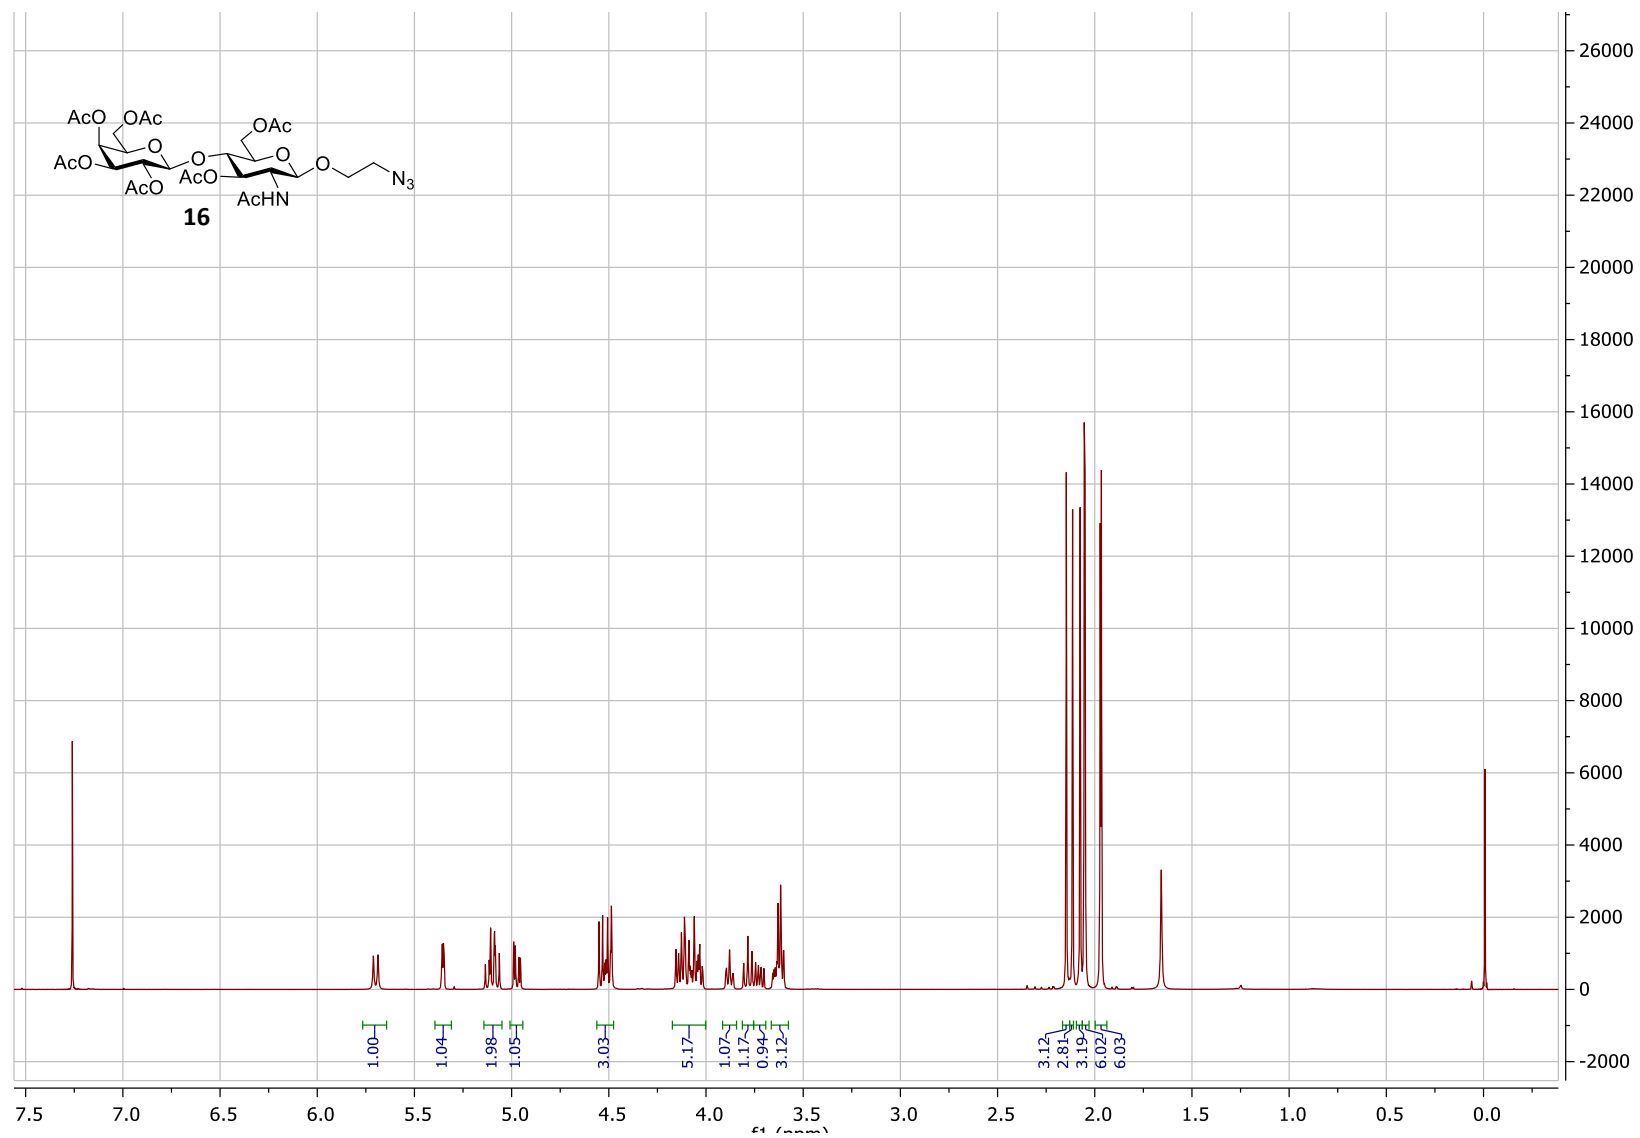

Compound **16**:  
<sup>13</sup>C NMR

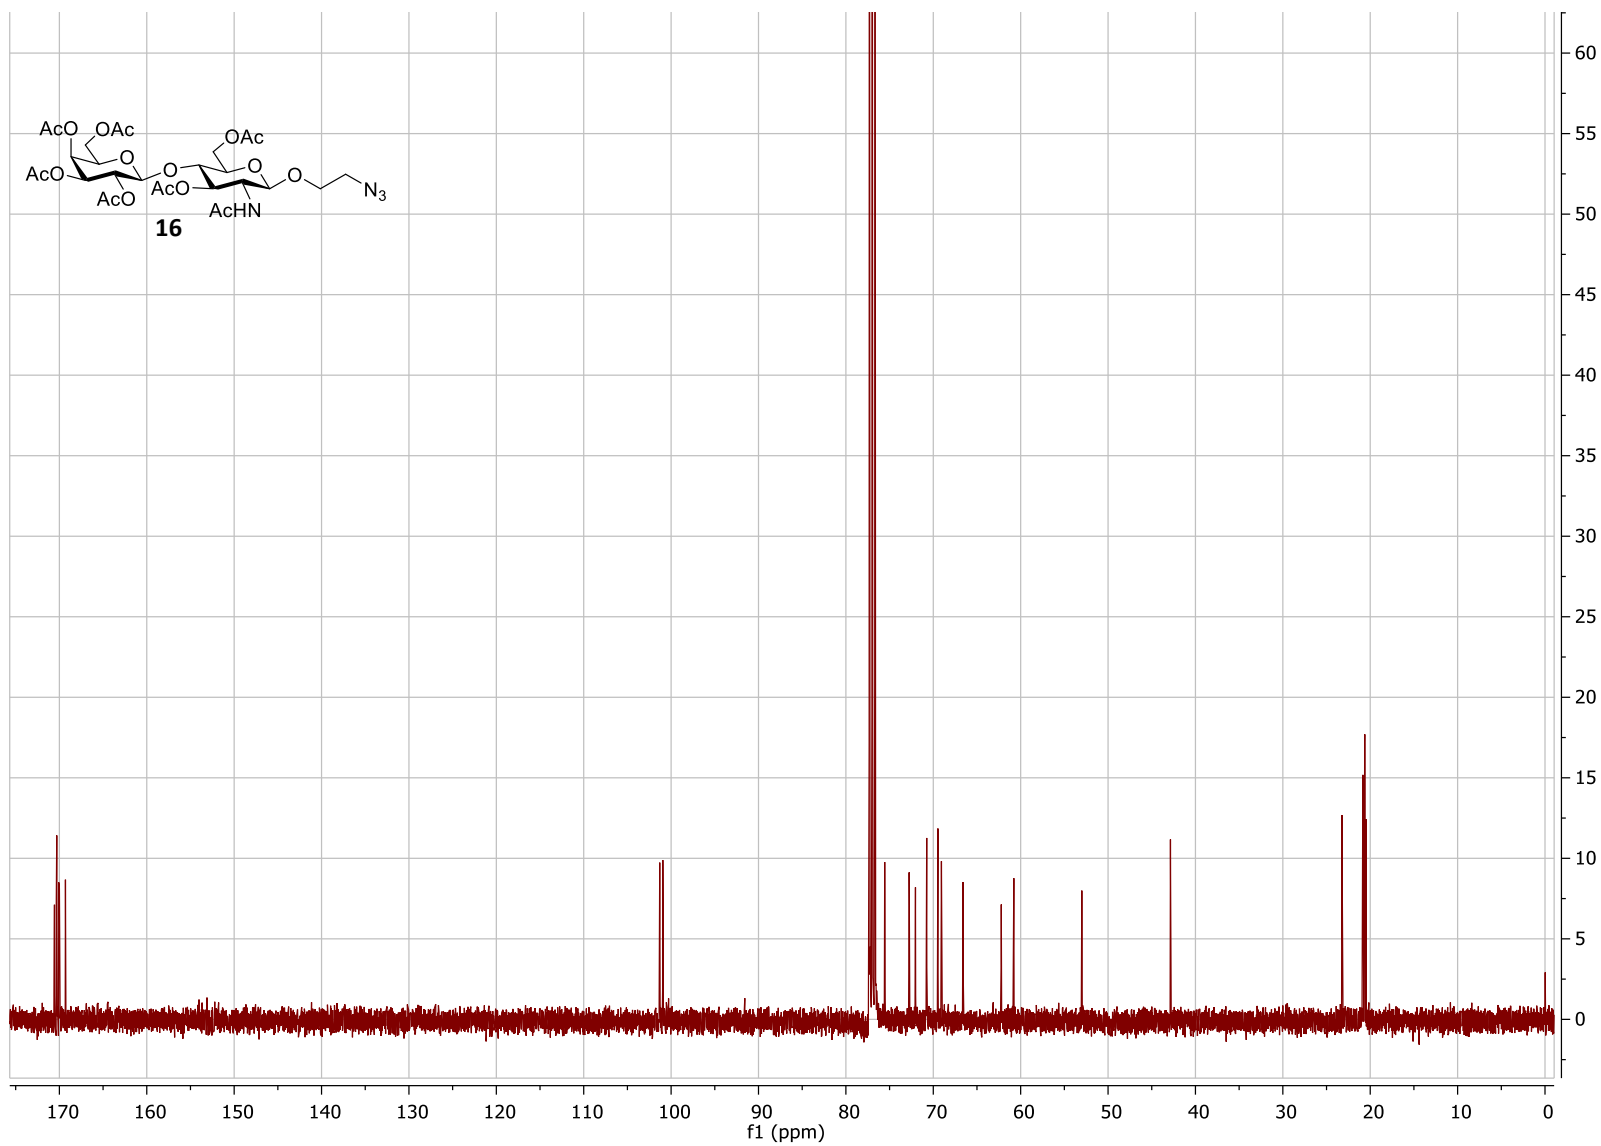



Compound **17**:  
<sup>1</sup>H NMR

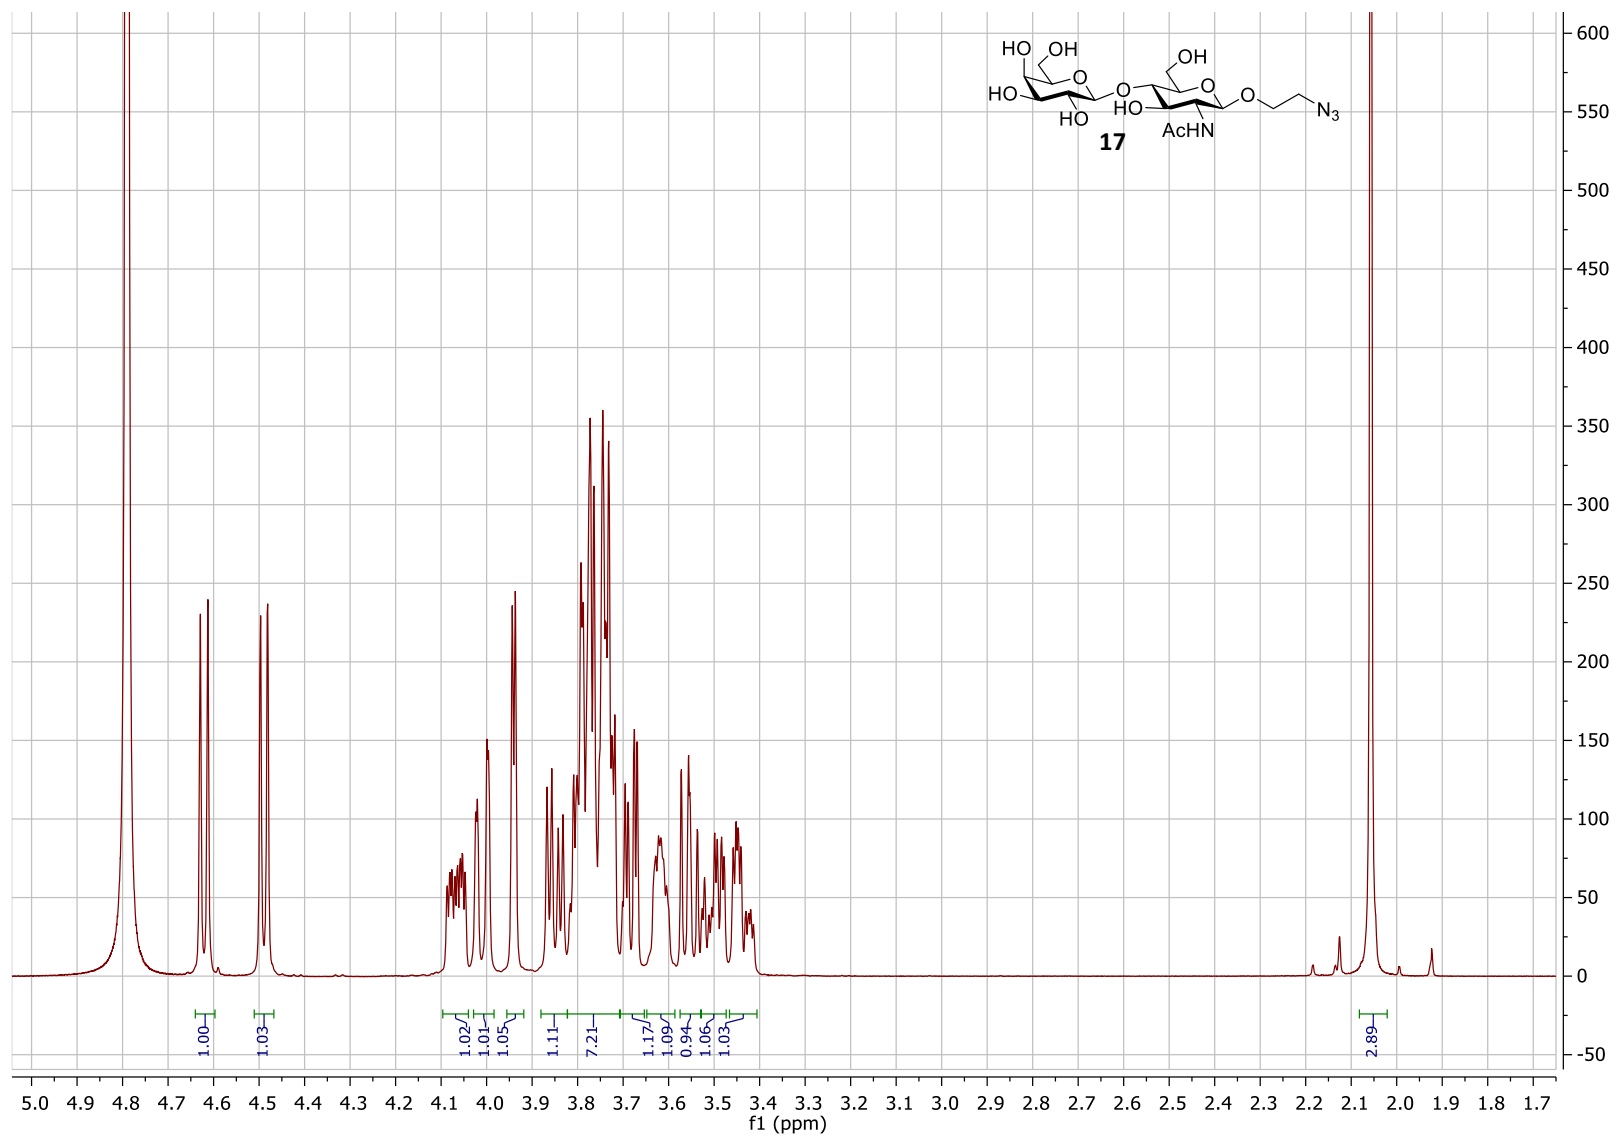

Compound **17**:  
<sup>13</sup>C NMR

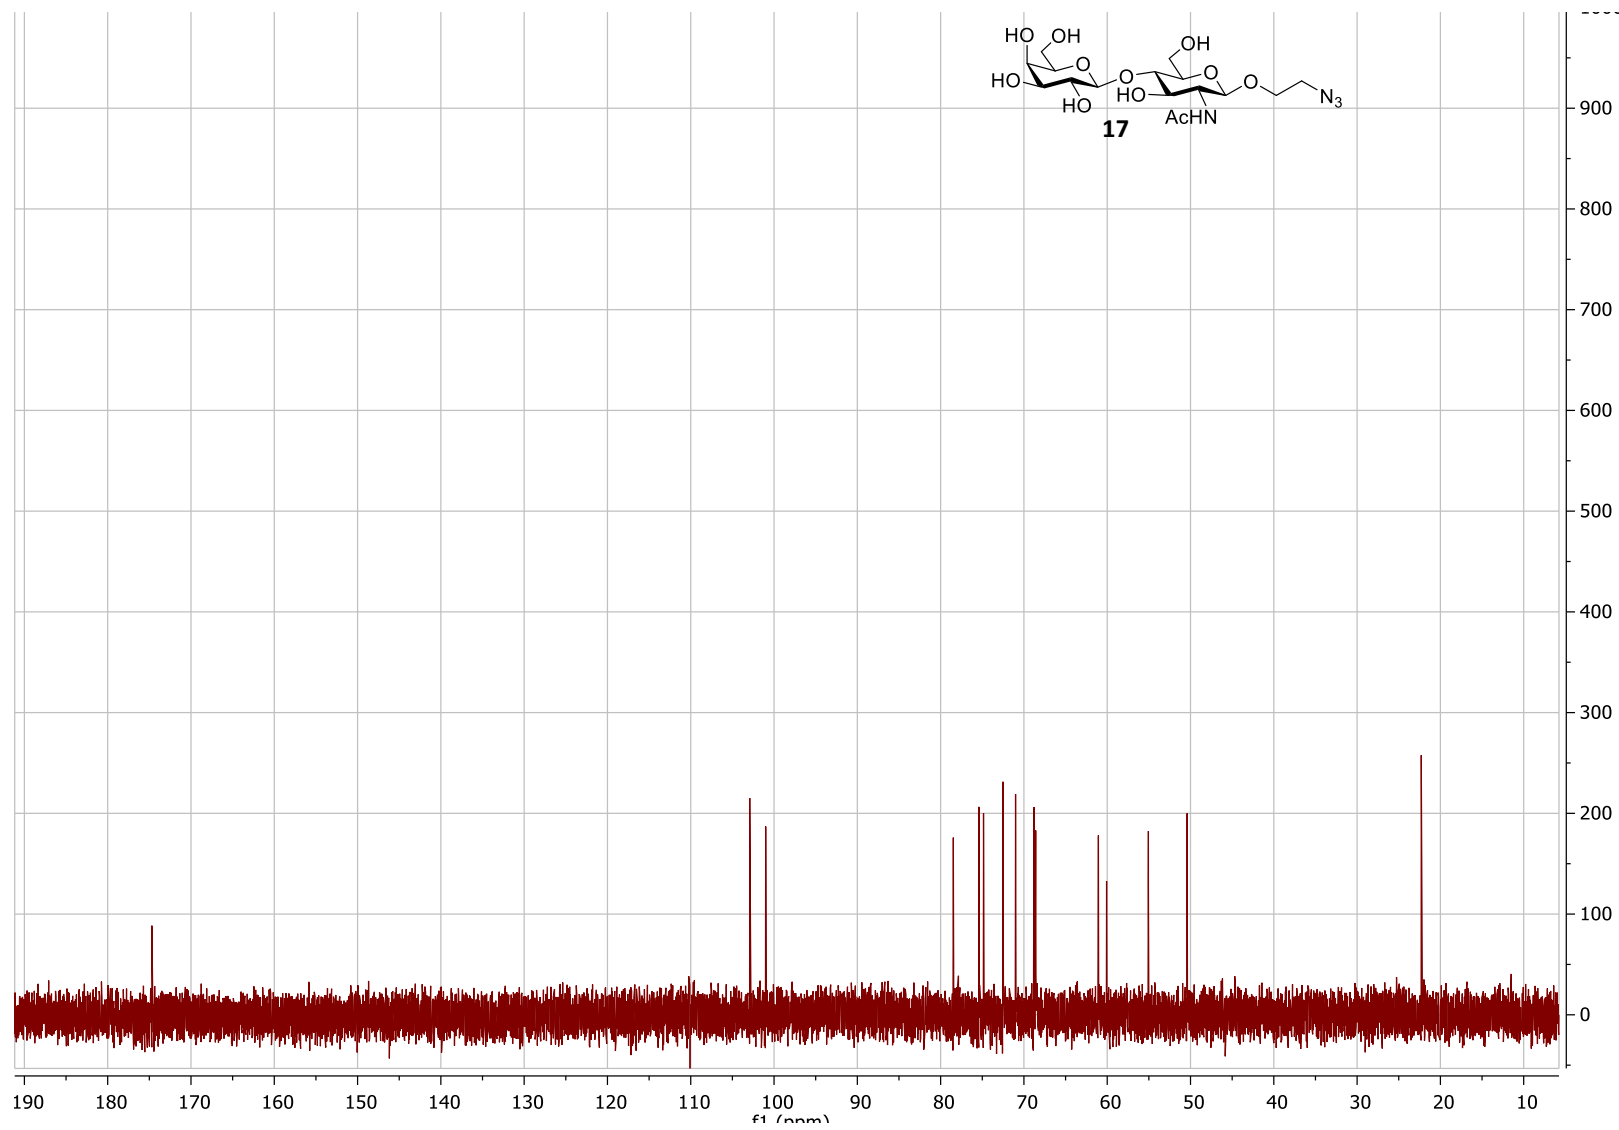

Compound **18**:  
<sup>1</sup>H NMR

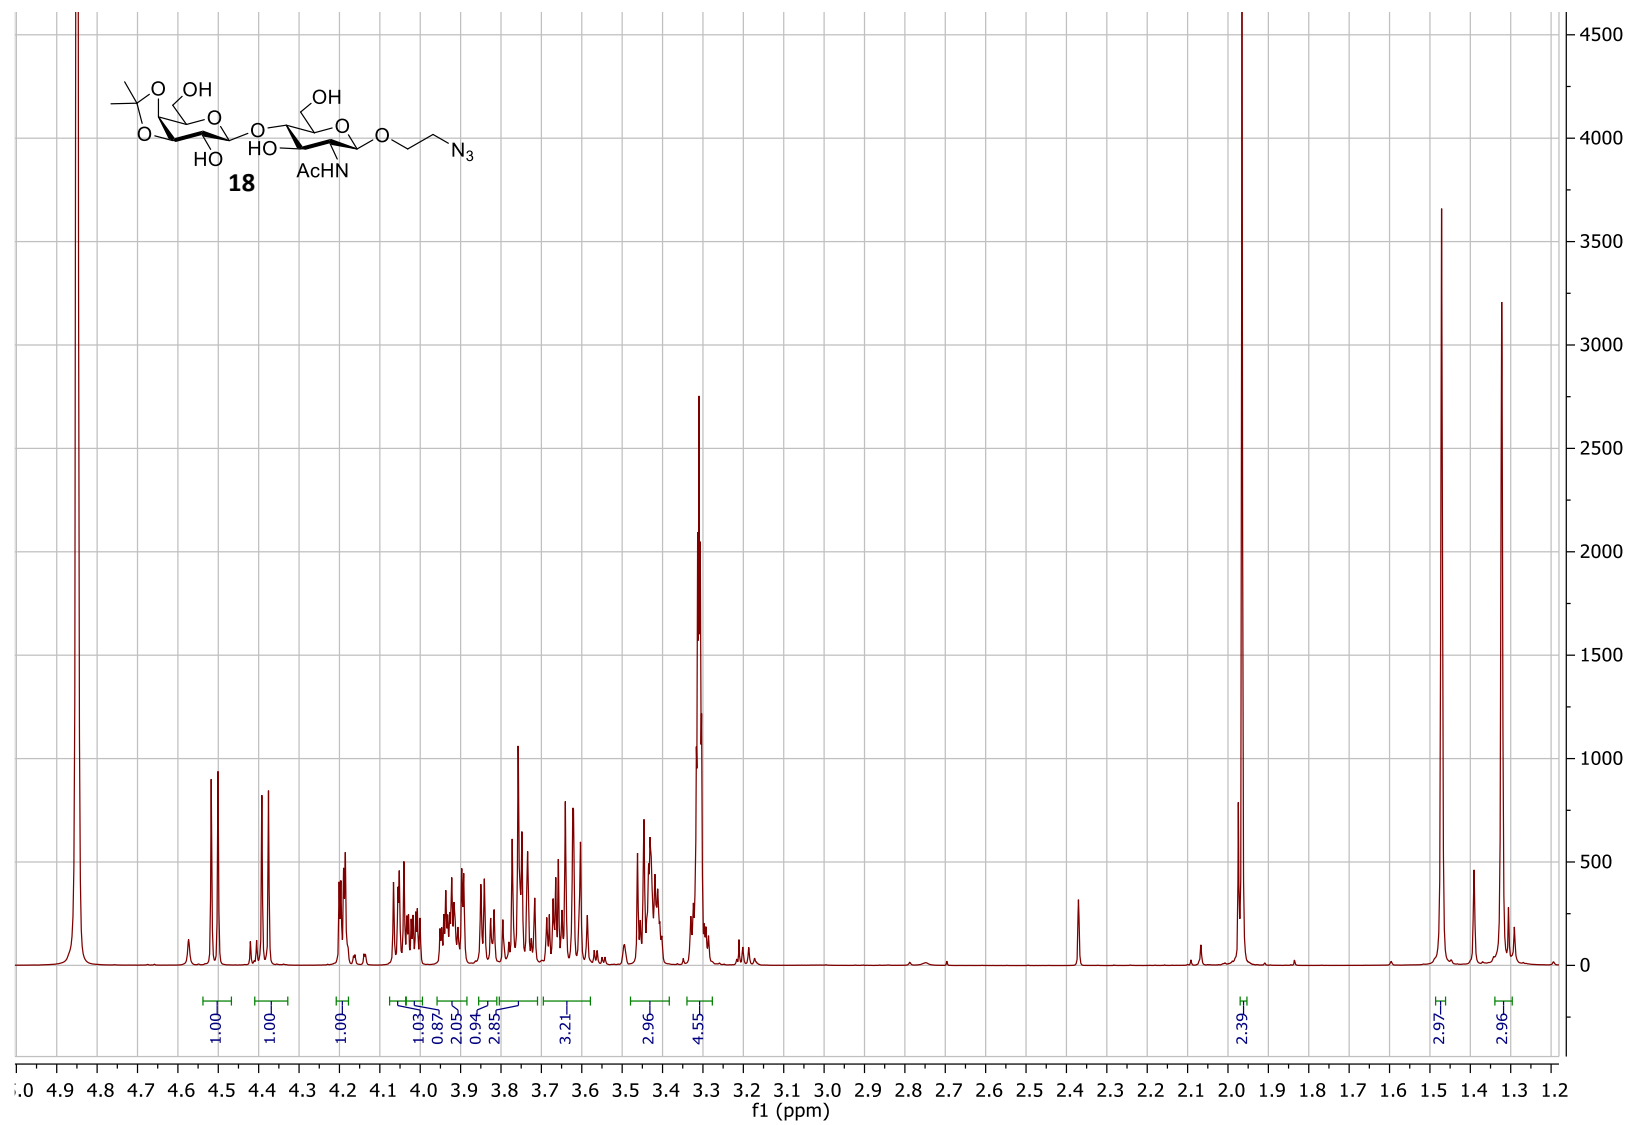

Compound **18**:  
<sup>13</sup>C NMR

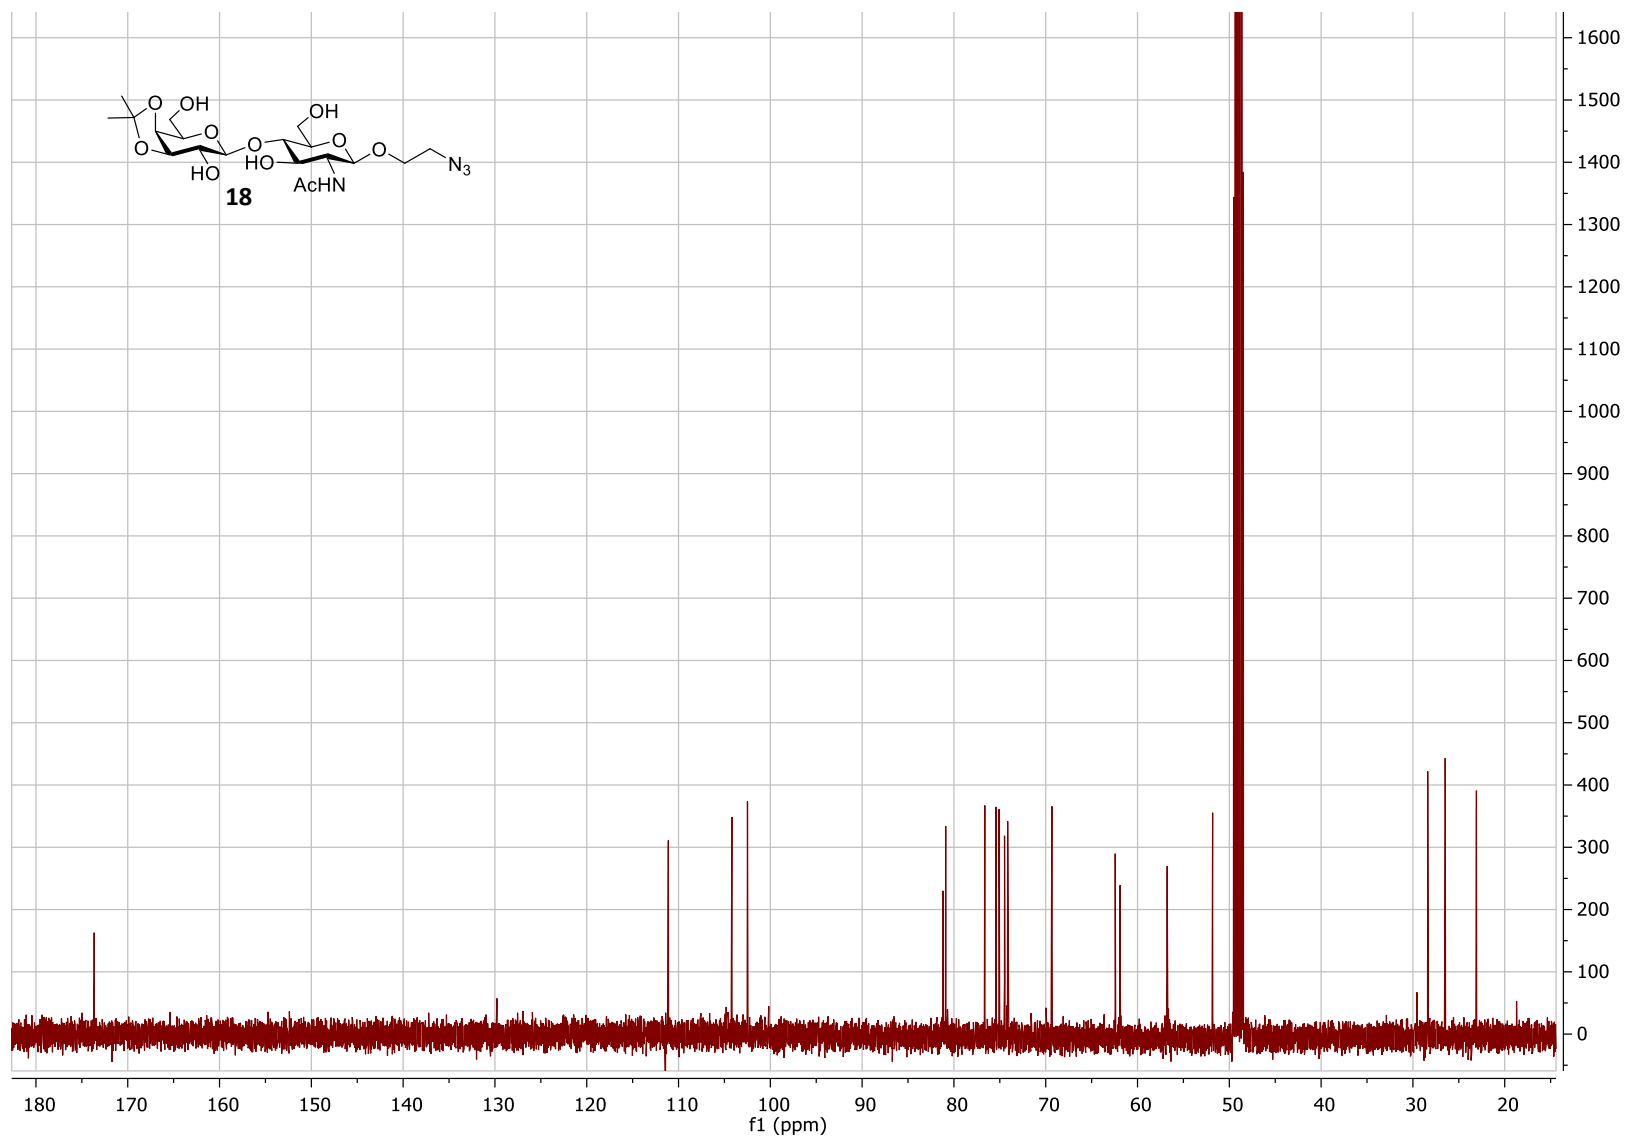

Compound **19**:  
<sup>1</sup>H NMR

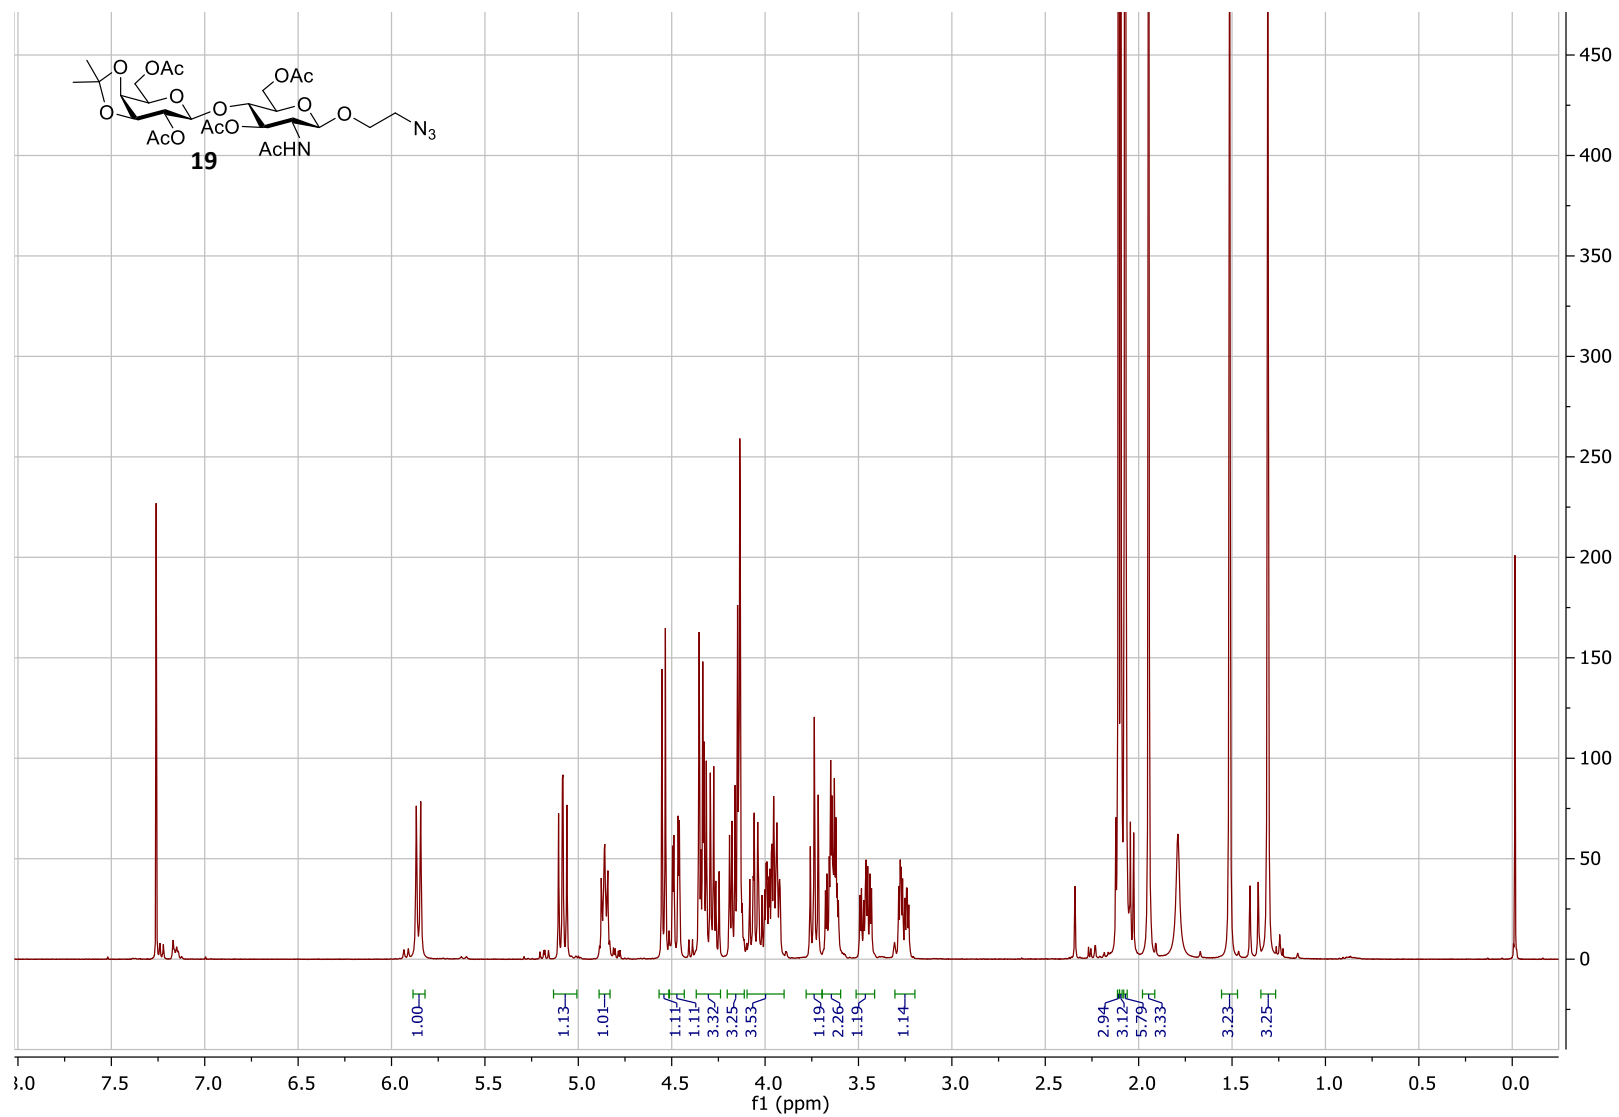

Compound **19**:  
<sup>13</sup>C NMR

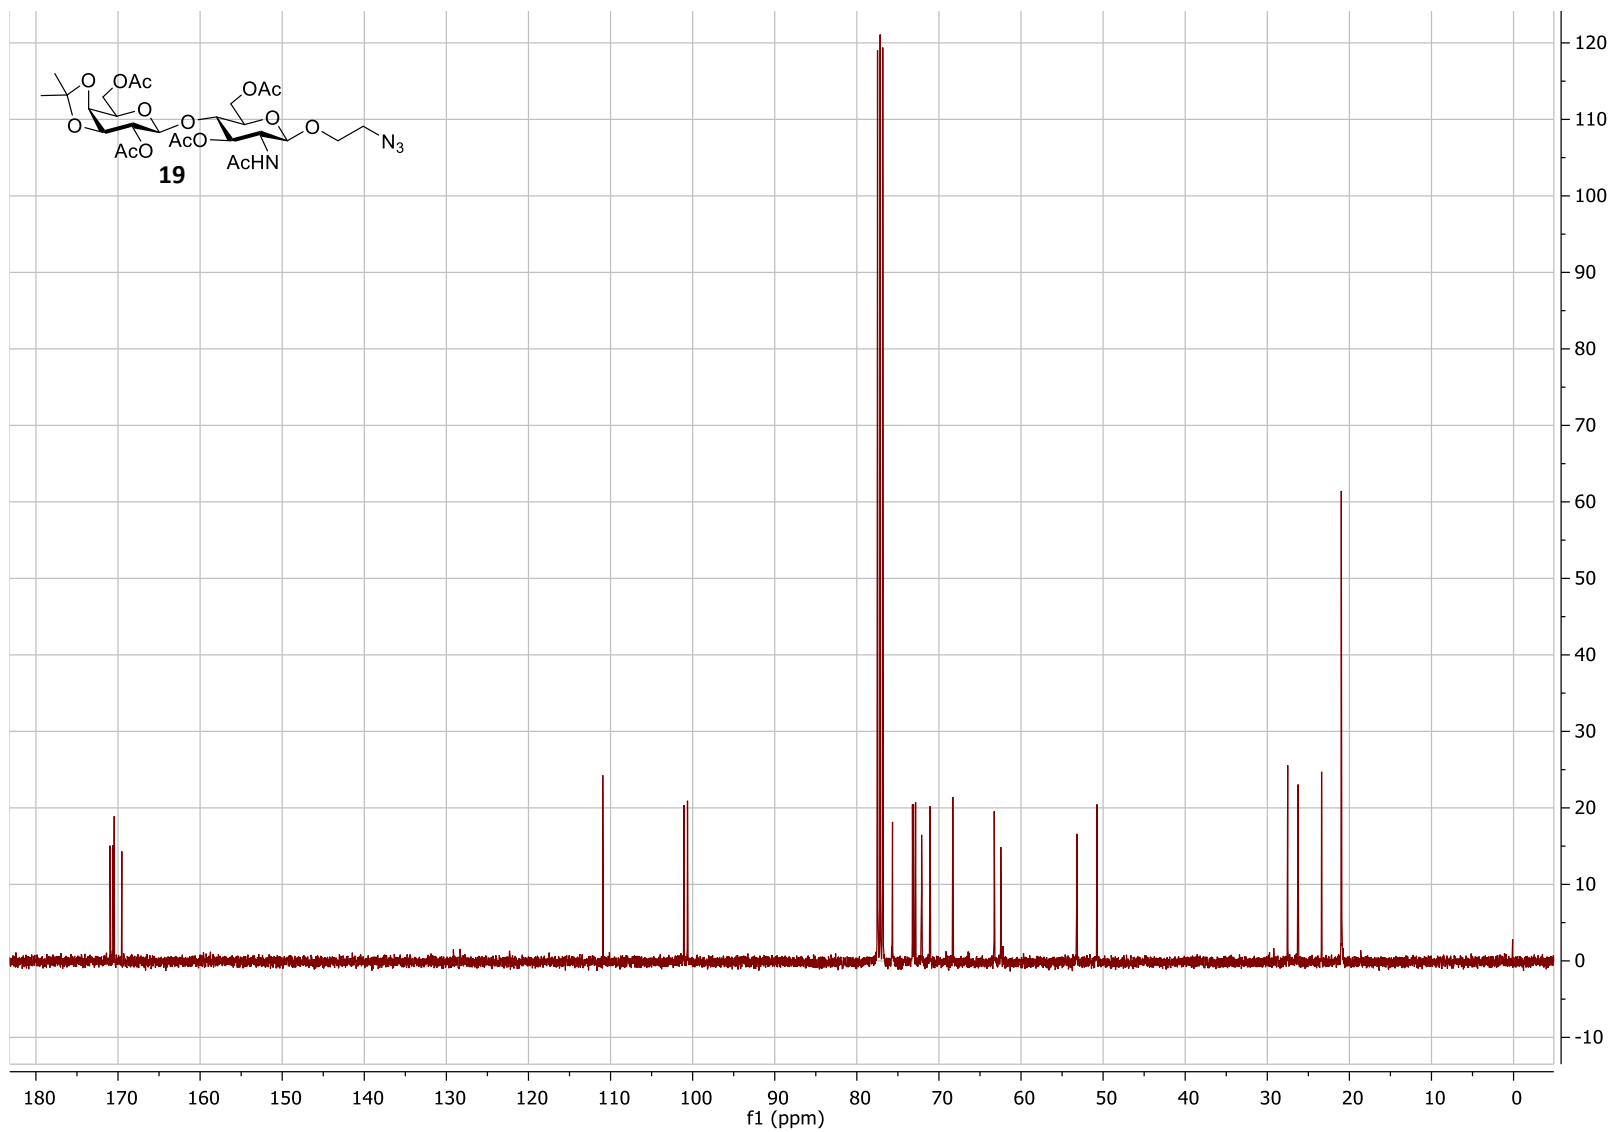

Compound **20**:  
<sup>1</sup>H NMR

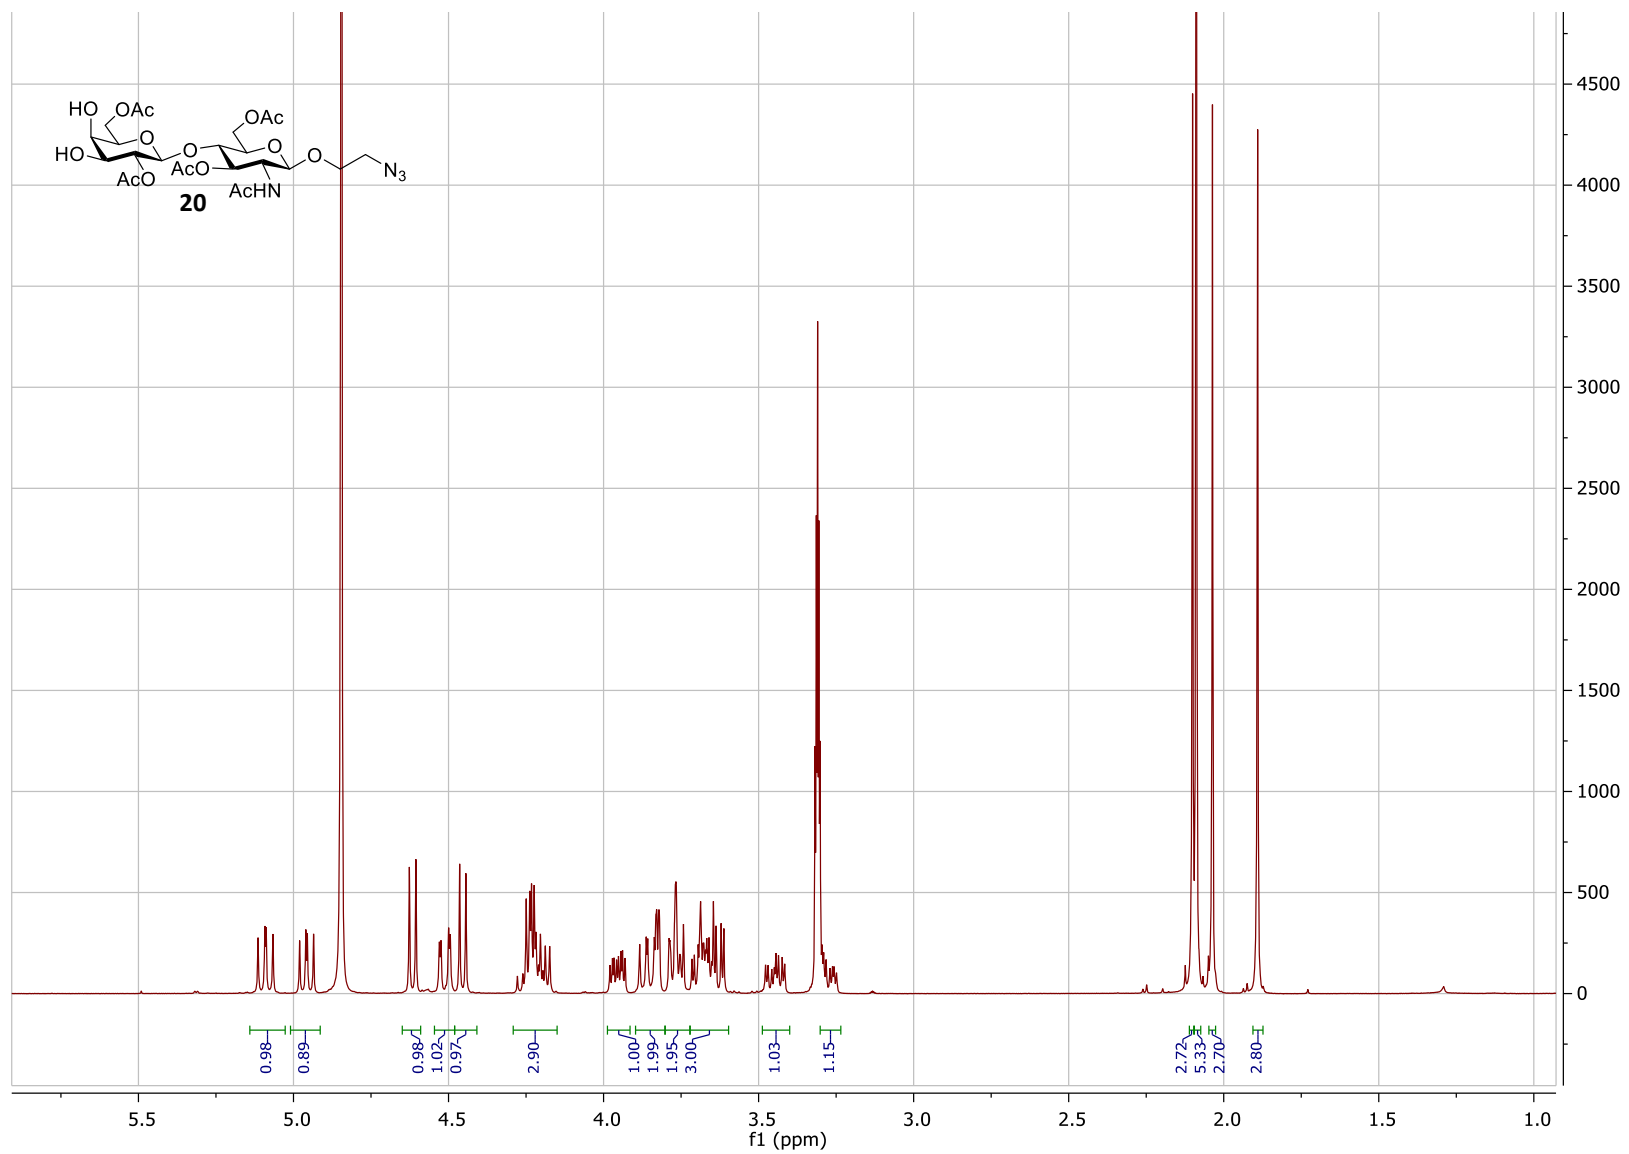

Compound **20**:  
<sup>13</sup>C NMR

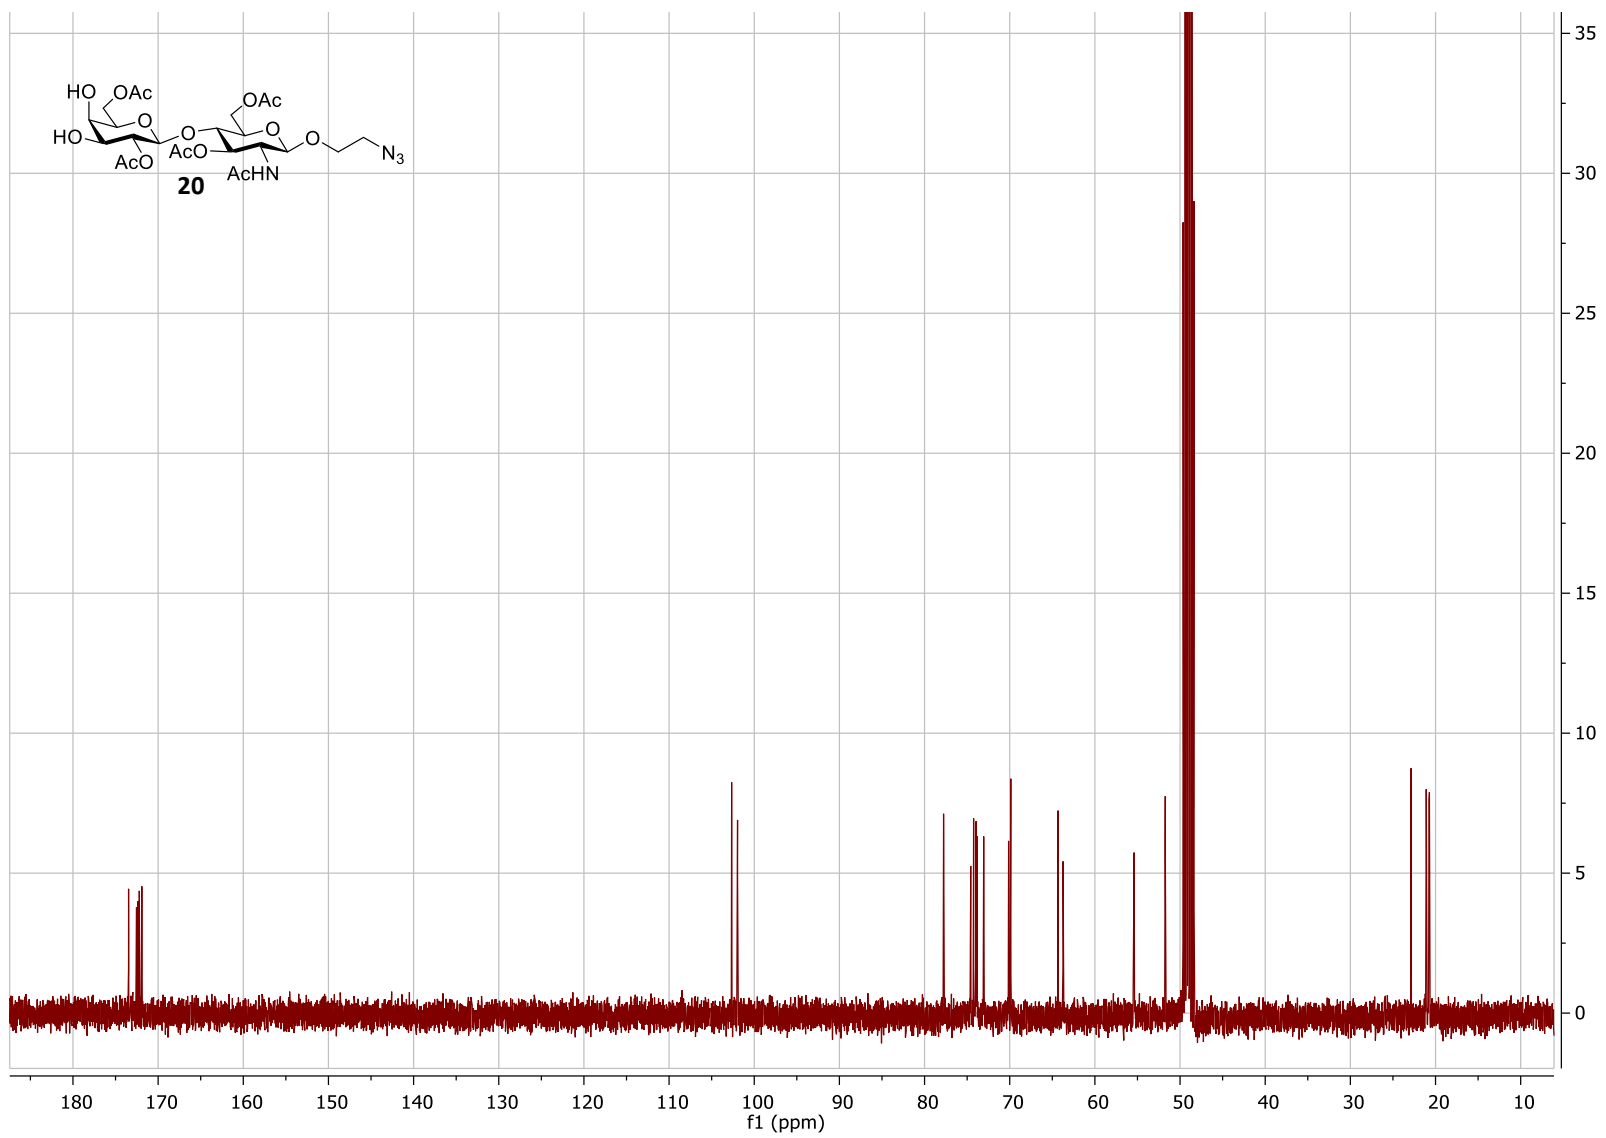



Compound **21**:  
<sup>1</sup>H NMR

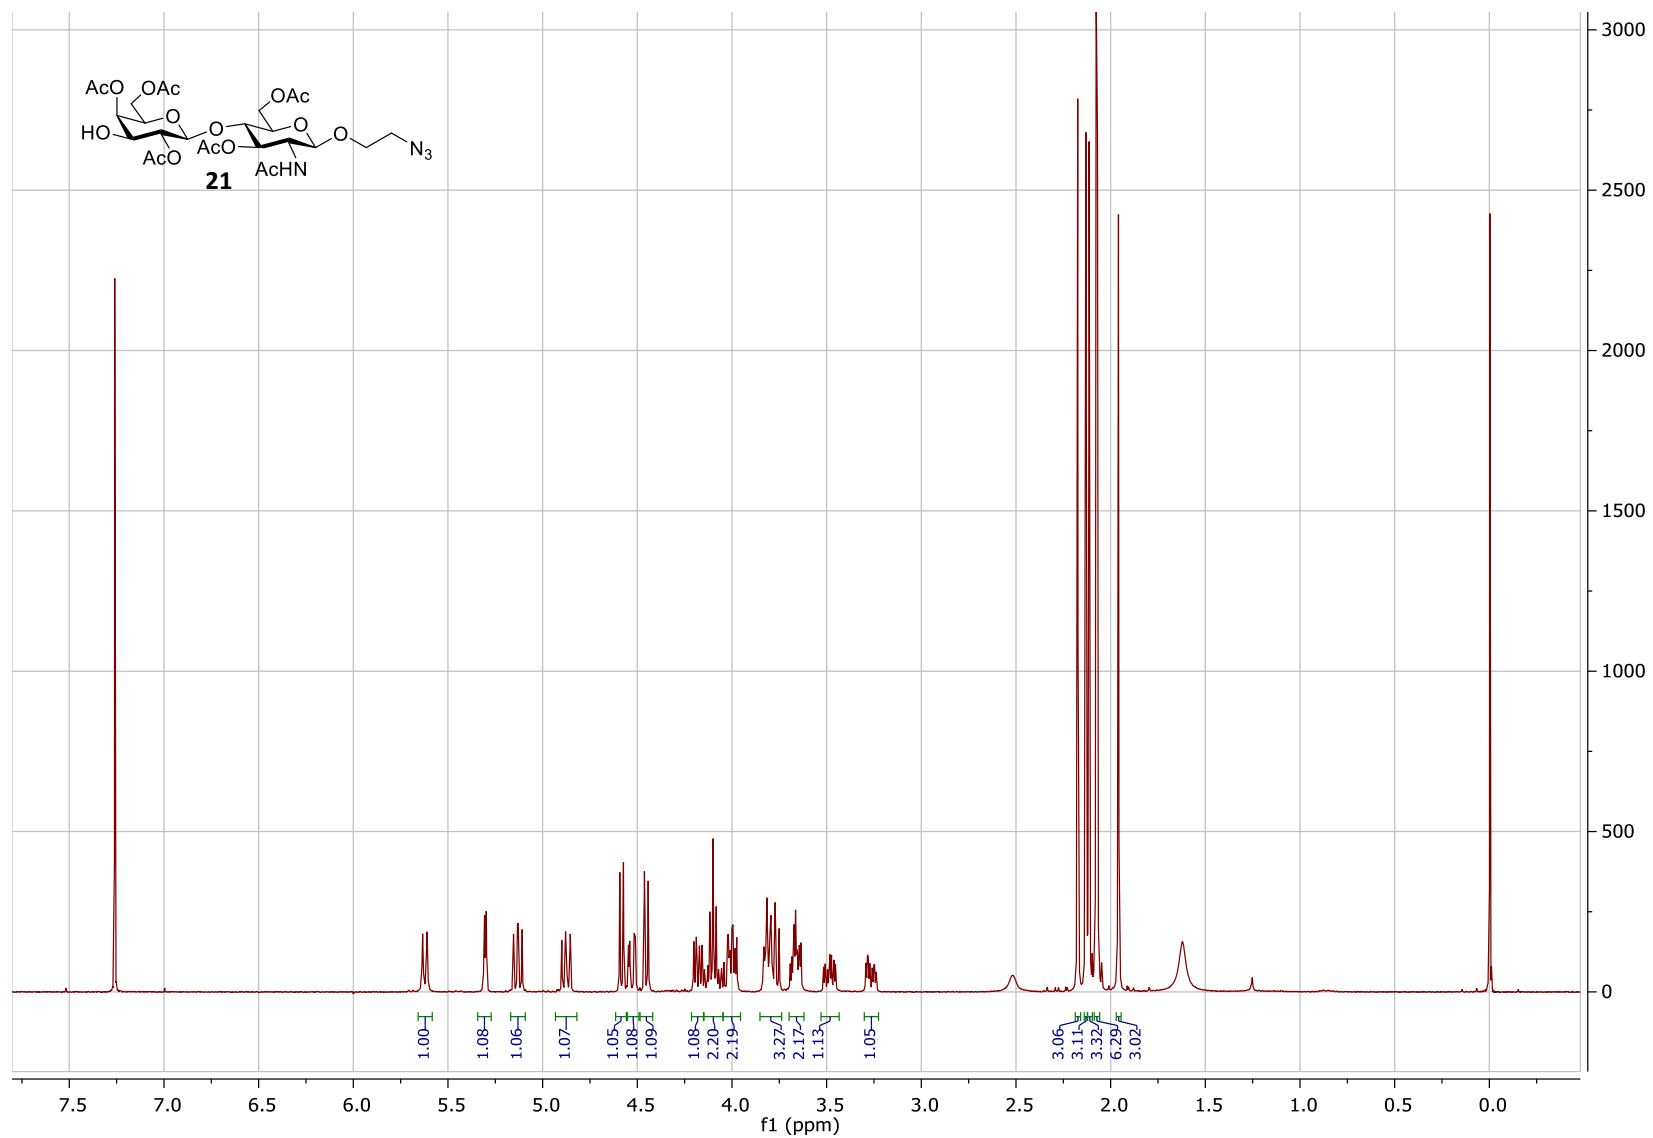

Compound **21**:  
<sup>13</sup>C NMR

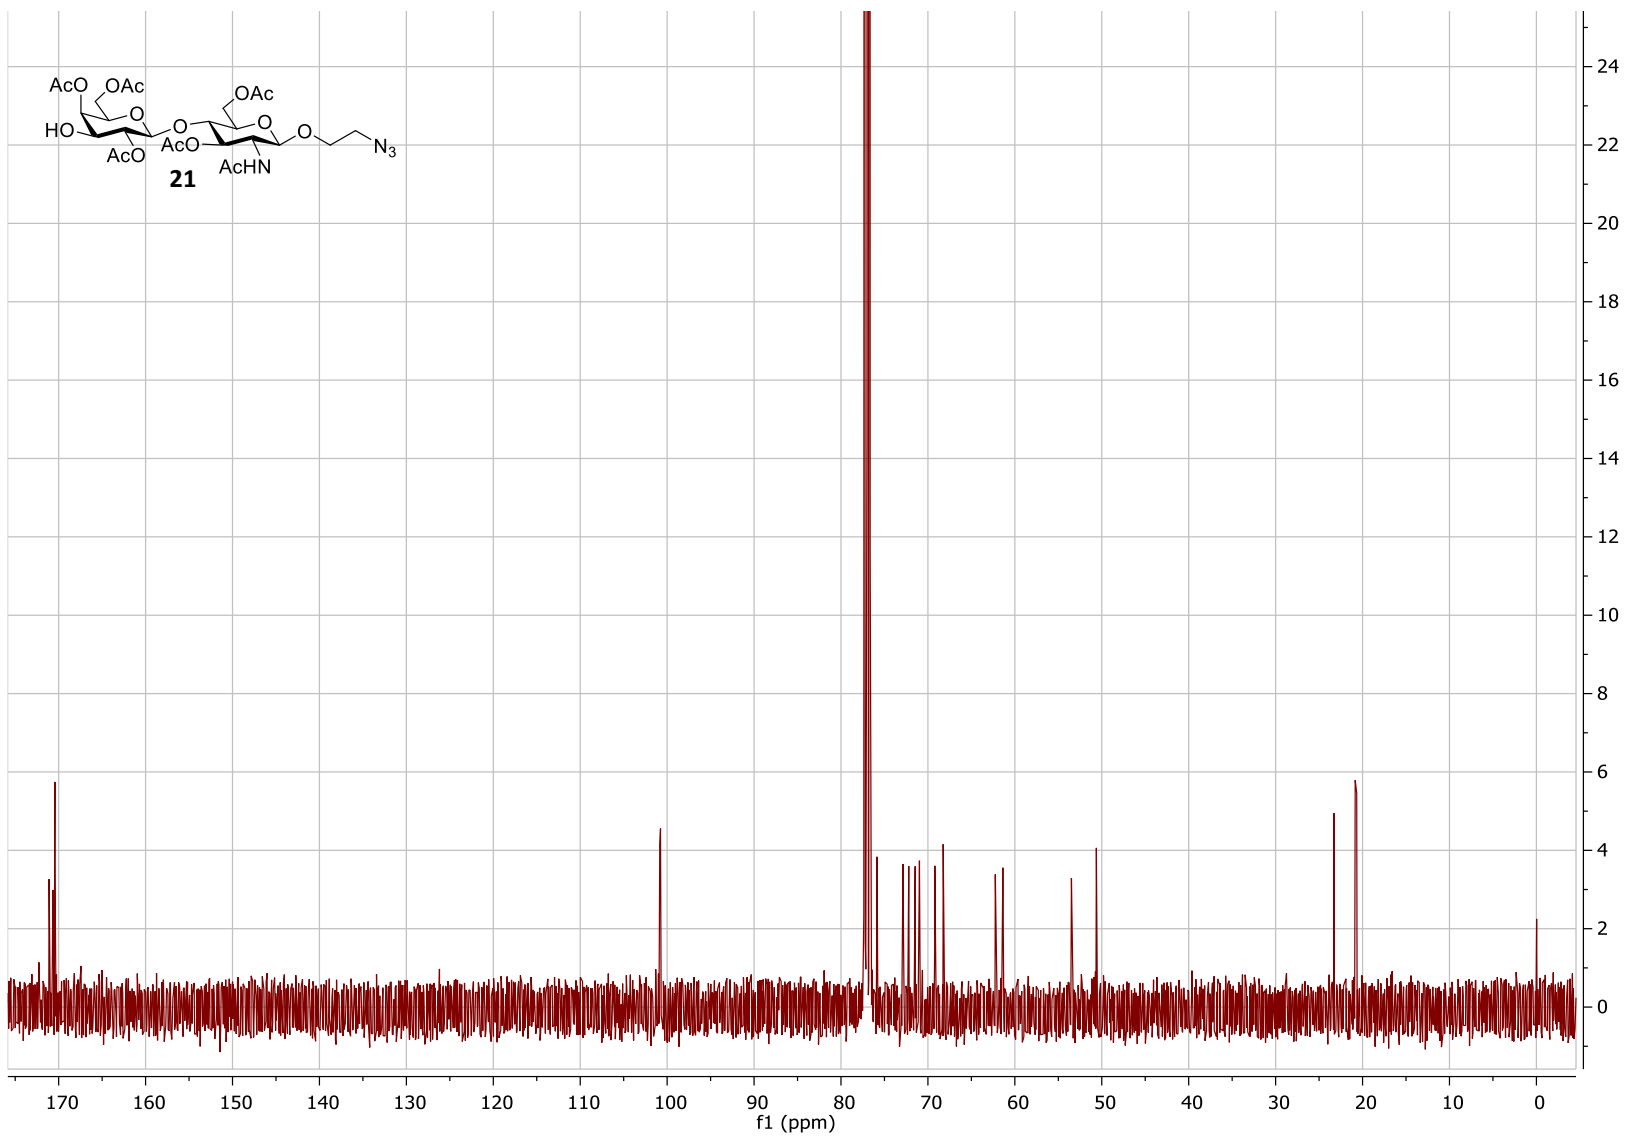

Compound 22:  
<sup>1</sup>H NMR

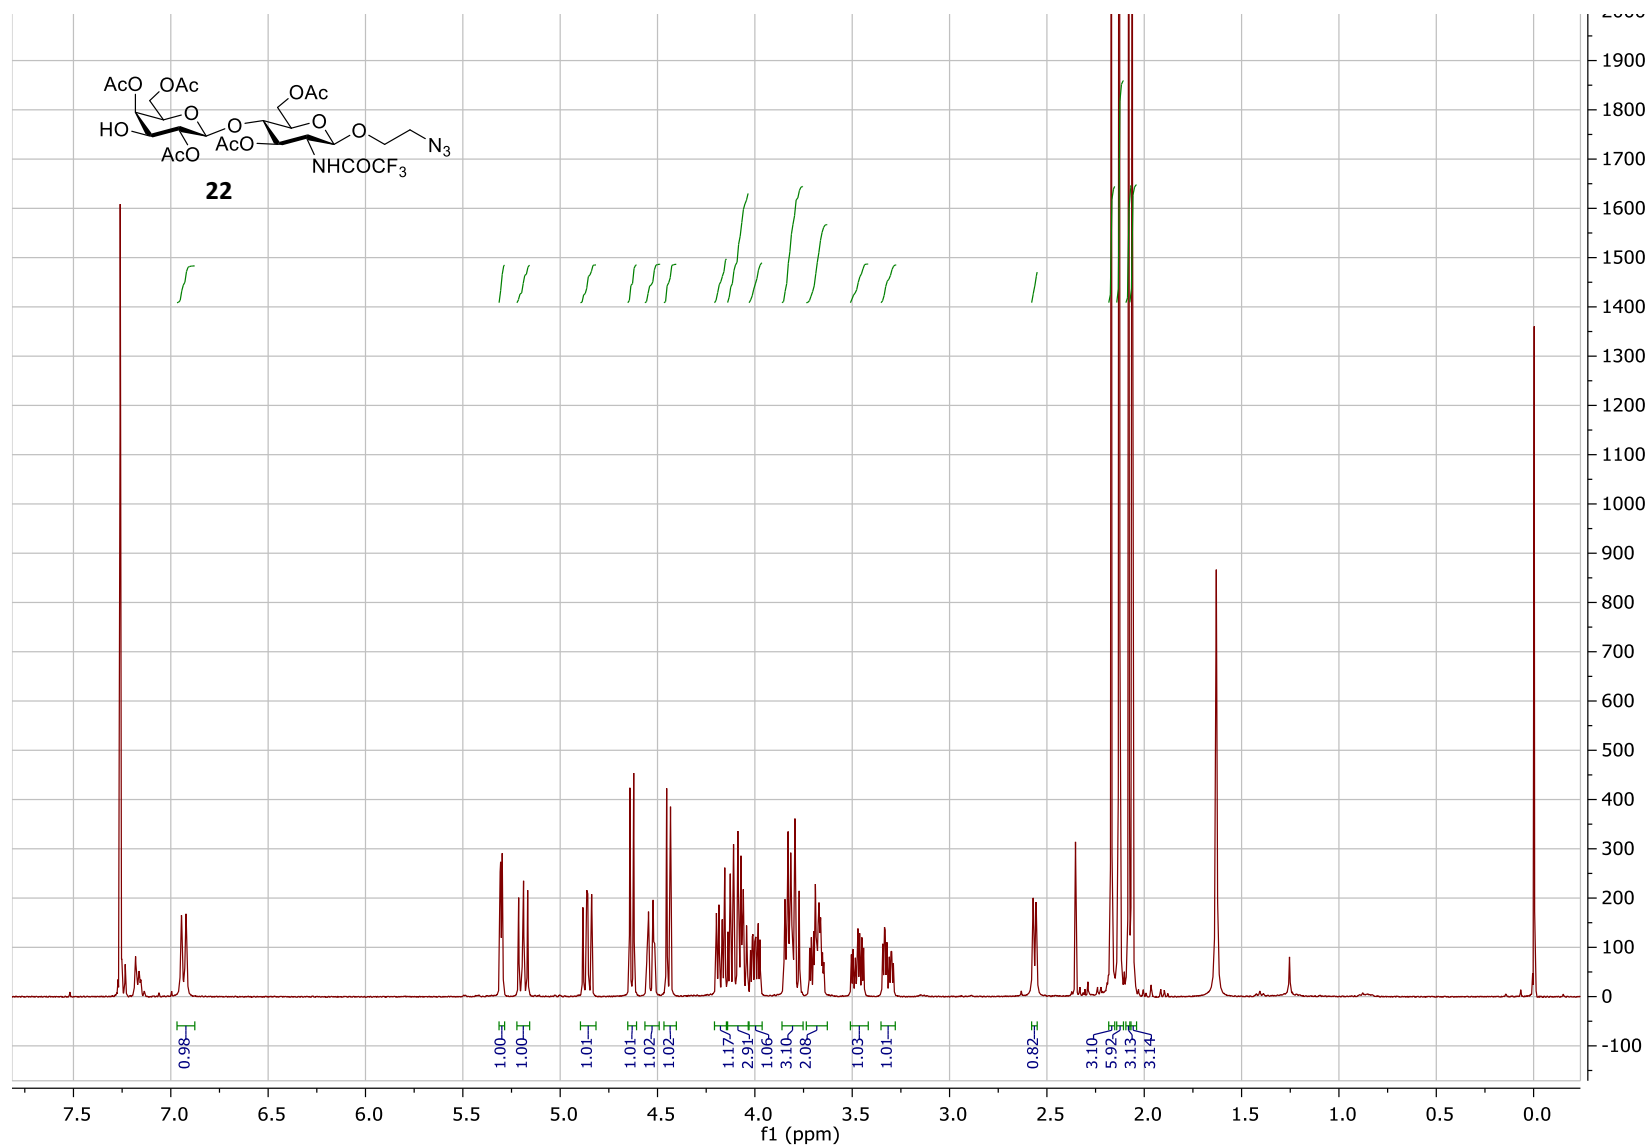

Compound **22**:  
<sup>13</sup>C NMR

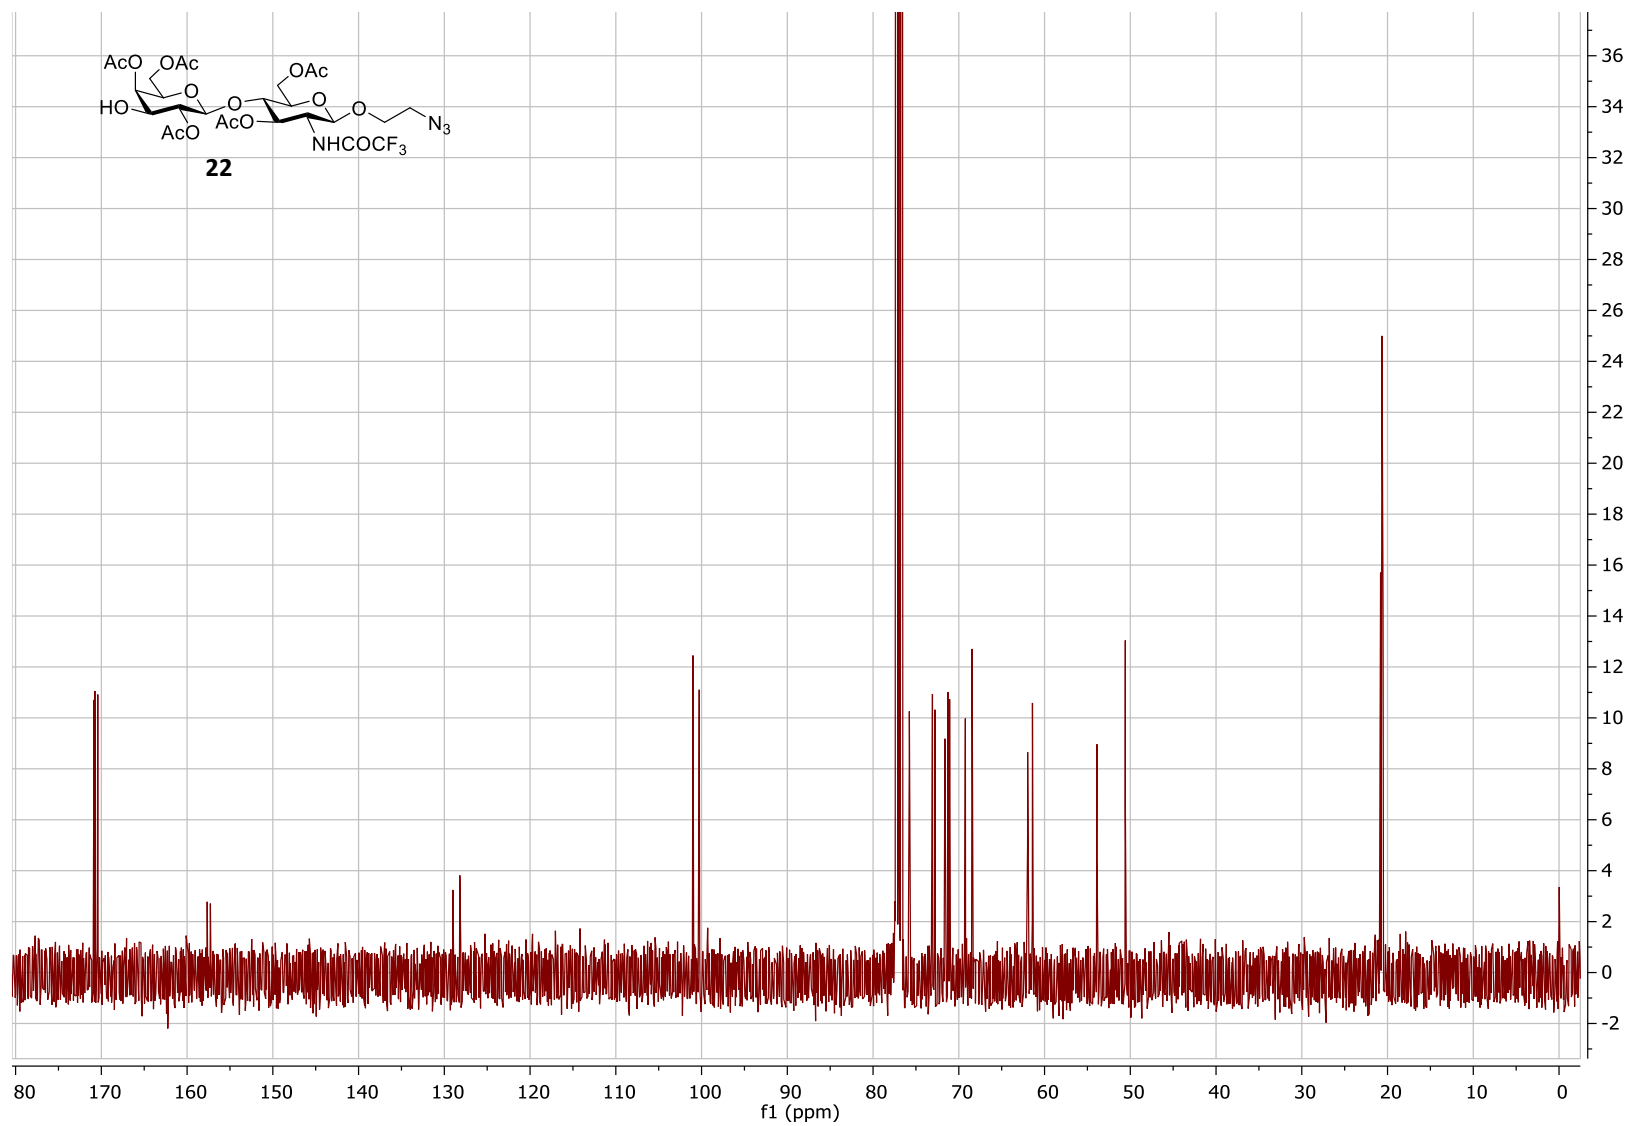

Compound **29**:  
<sup>1</sup>H NMR

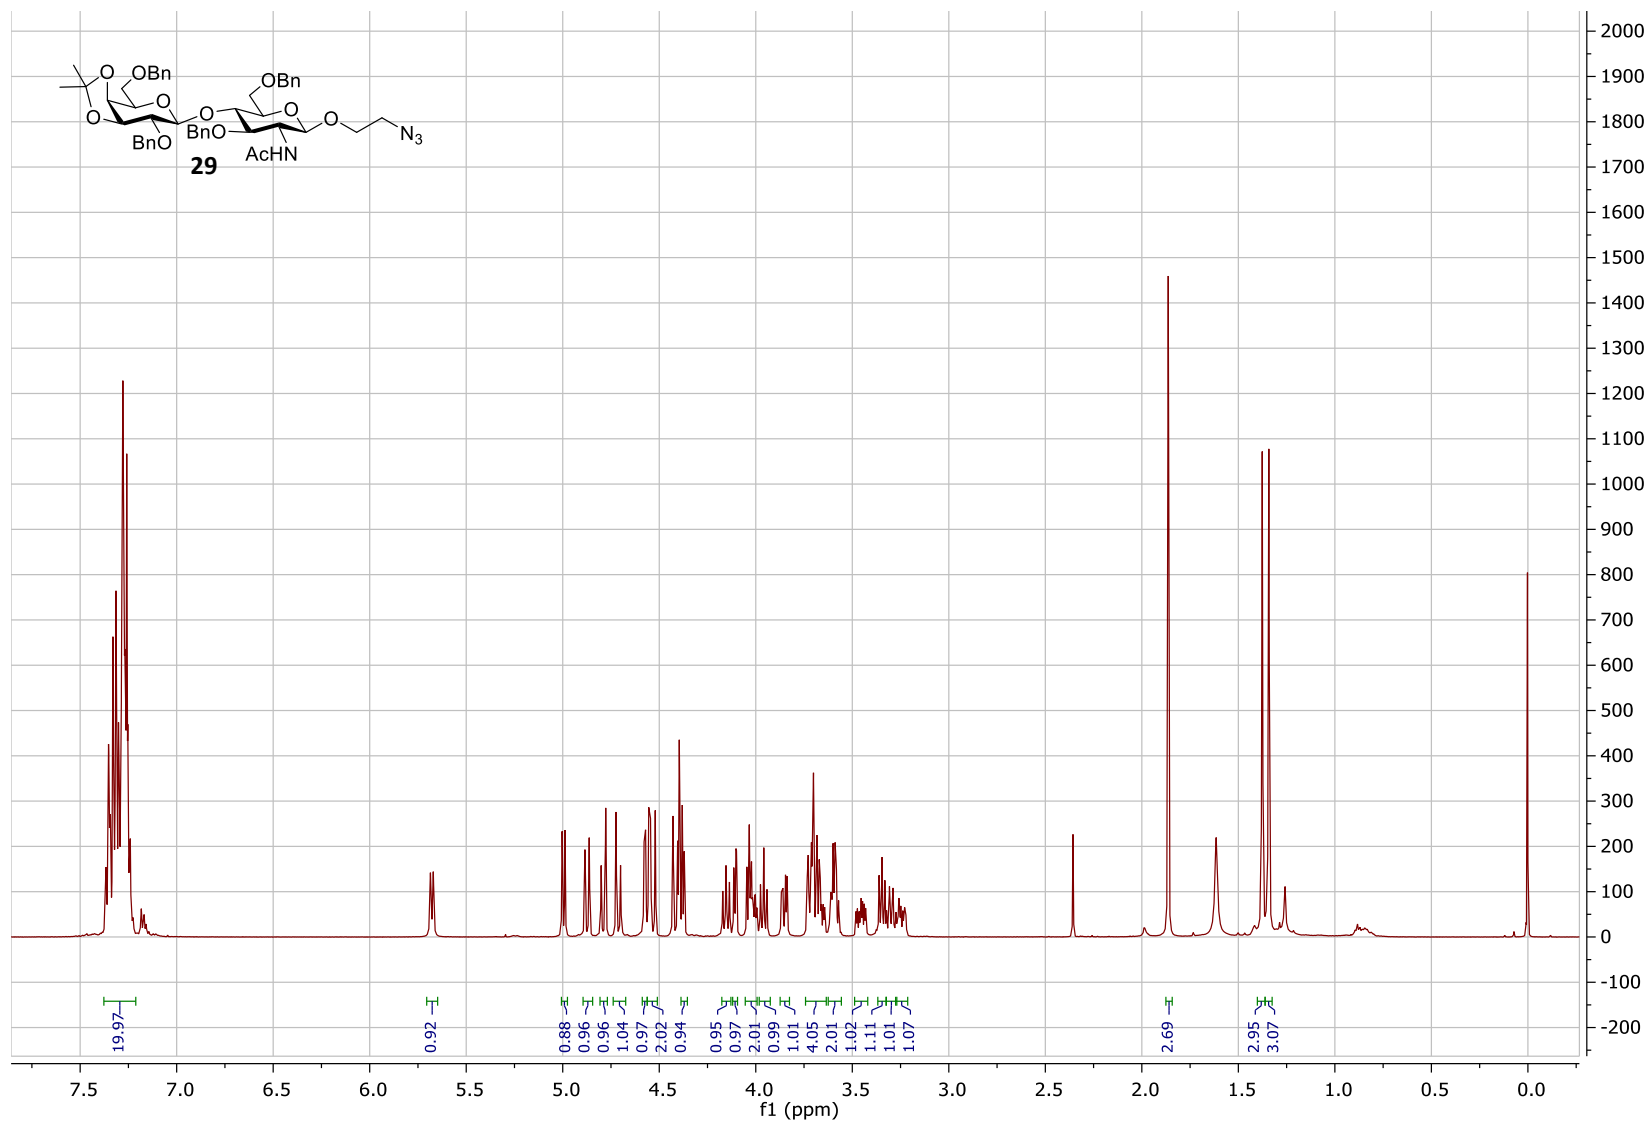



Compound **30**:  
<sup>1</sup>H NMR

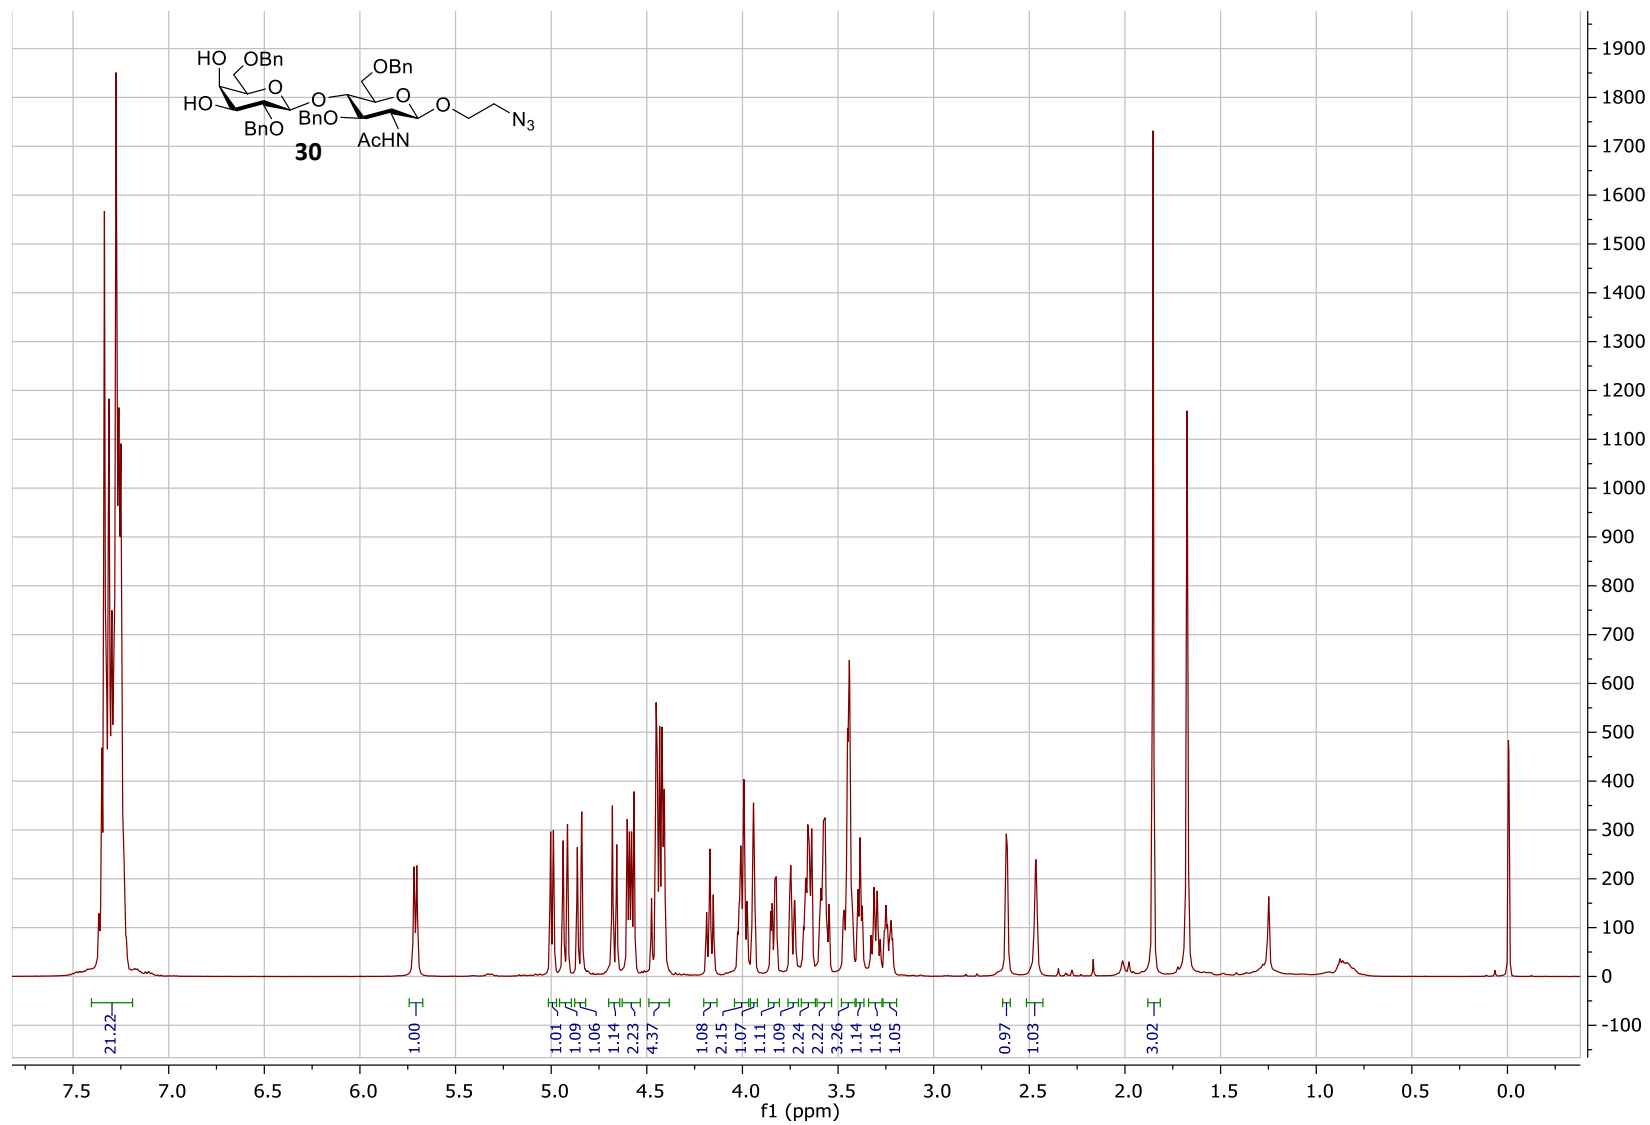

Compound **30**:  
<sup>13</sup>C NMR

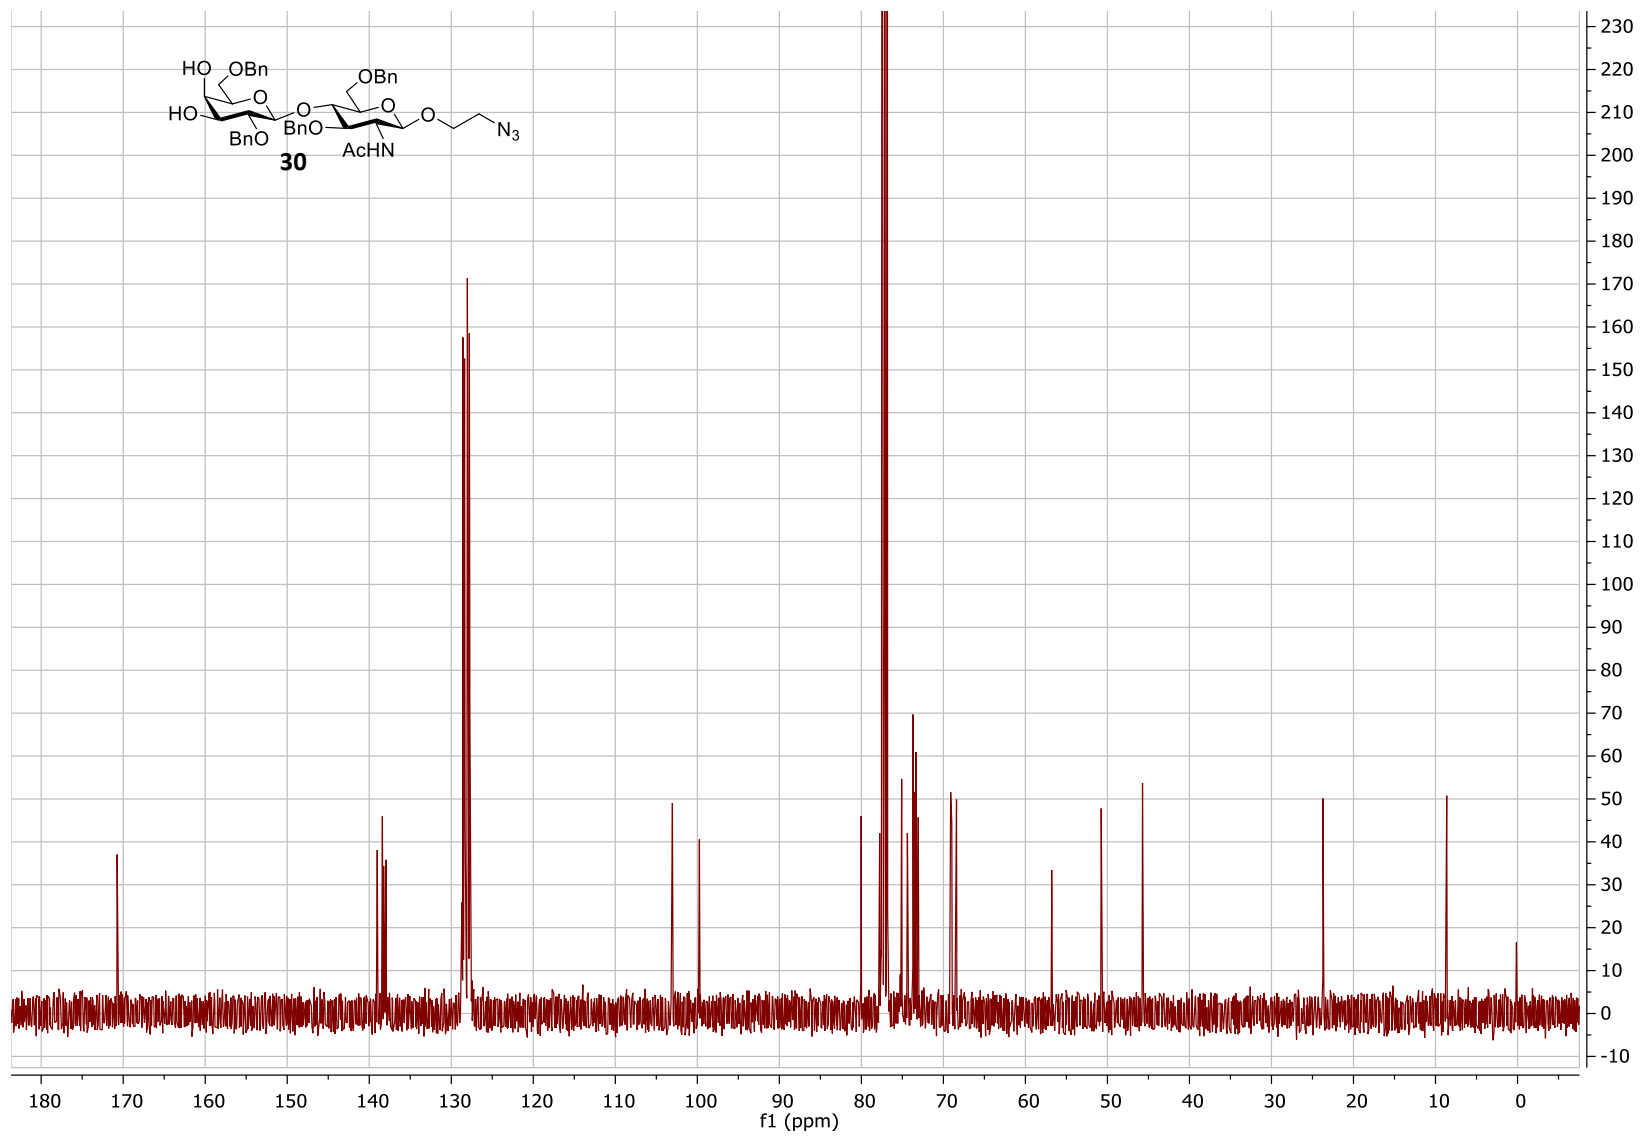



Compound **31**:  
<sup>1</sup>H NMR

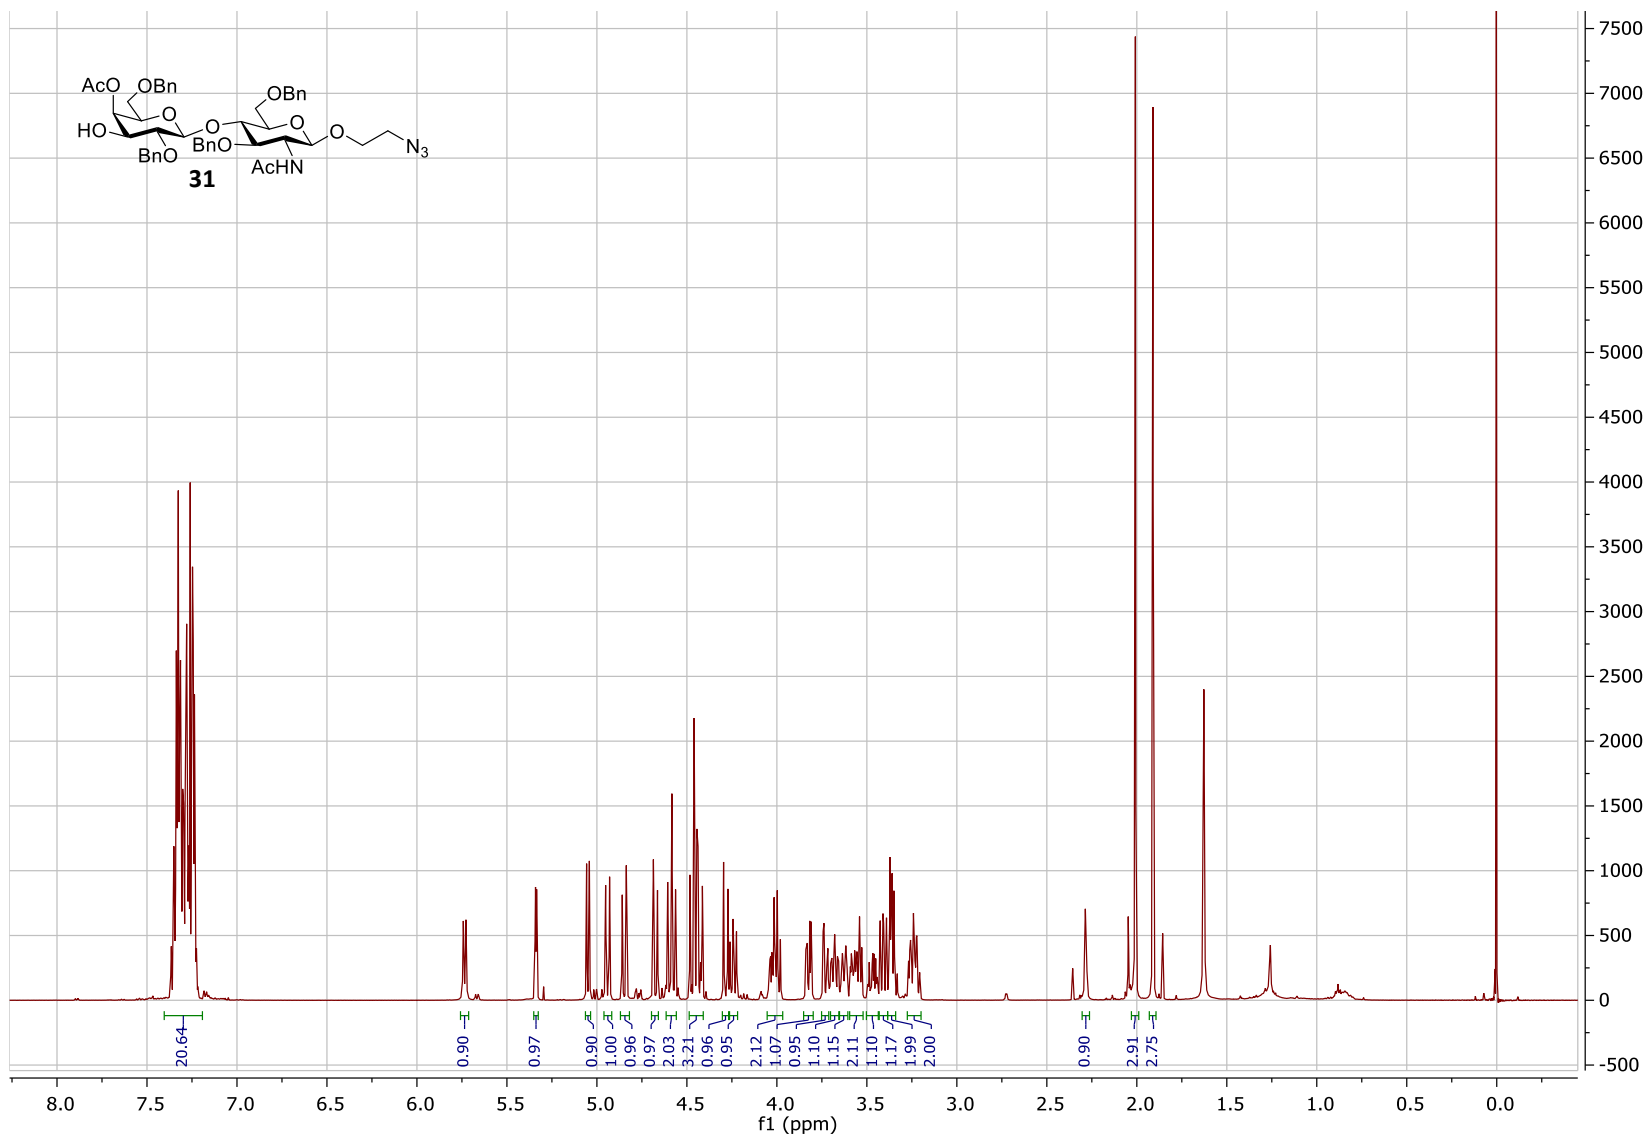

Compound **31**:  
<sup>13</sup>C NMR

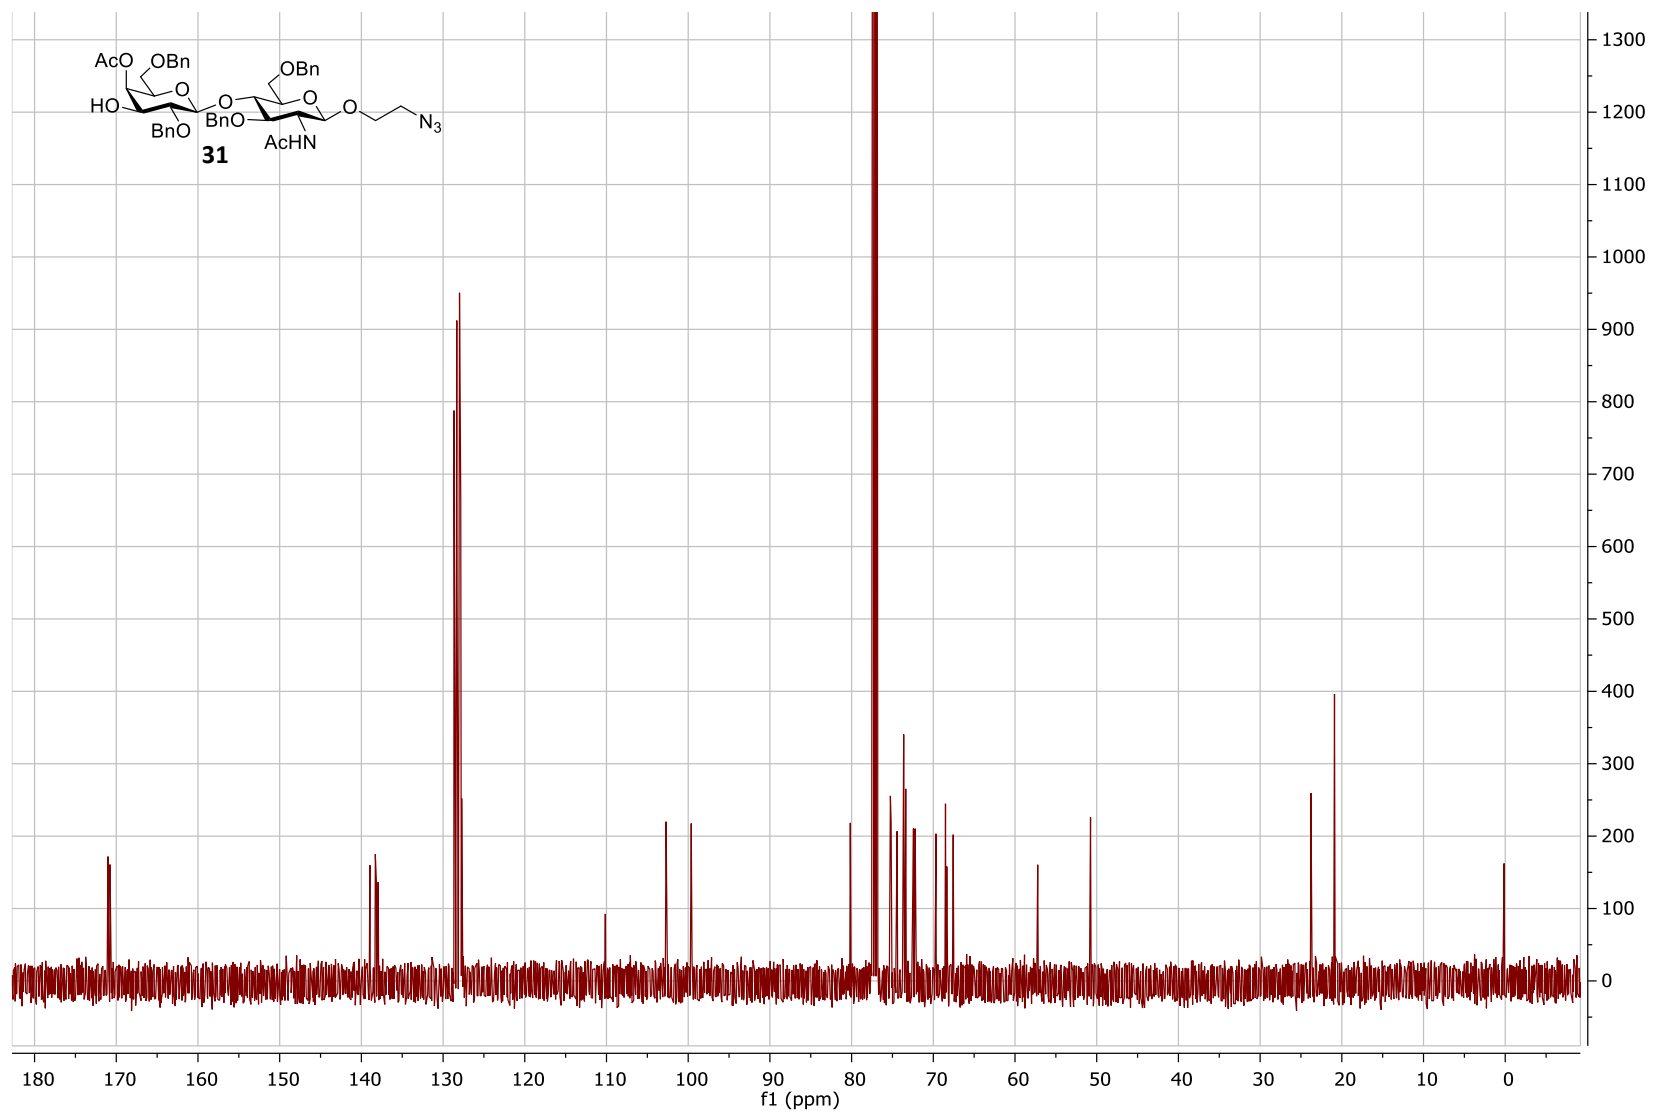

Compound **32**:  
<sup>1</sup>H NMR

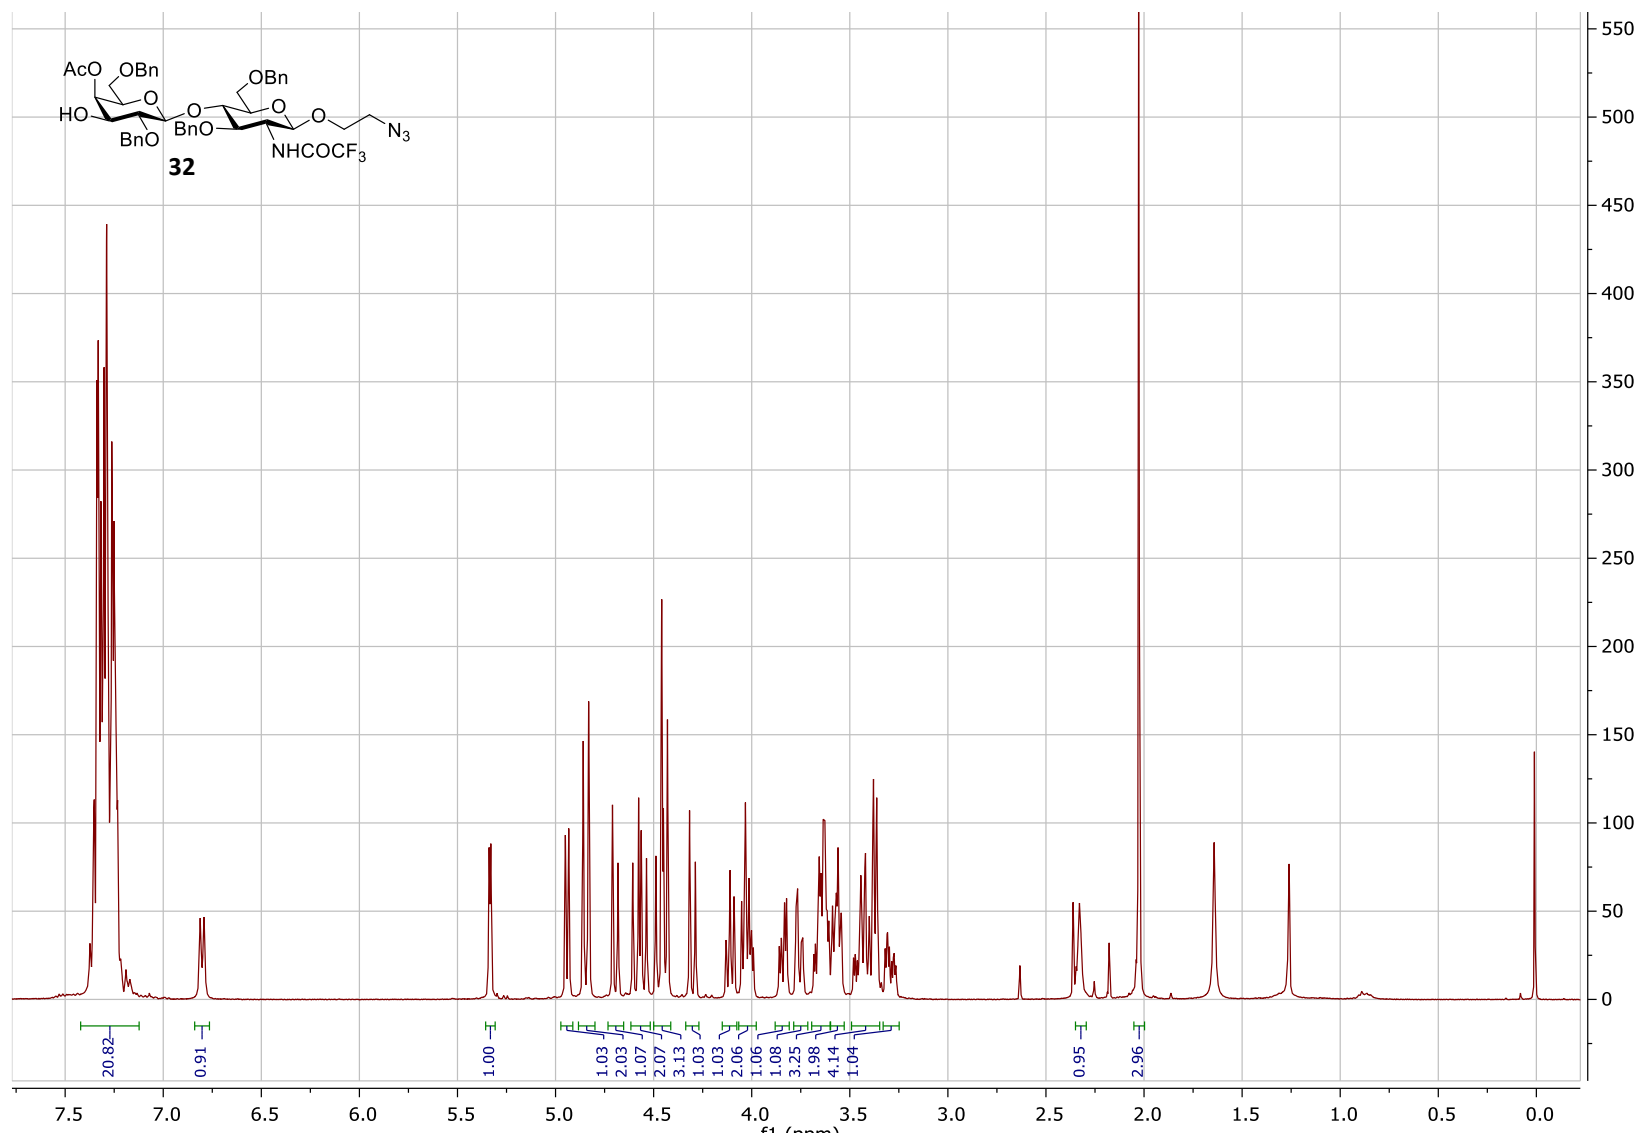

Compound **32**:  
<sup>13</sup>C NMR

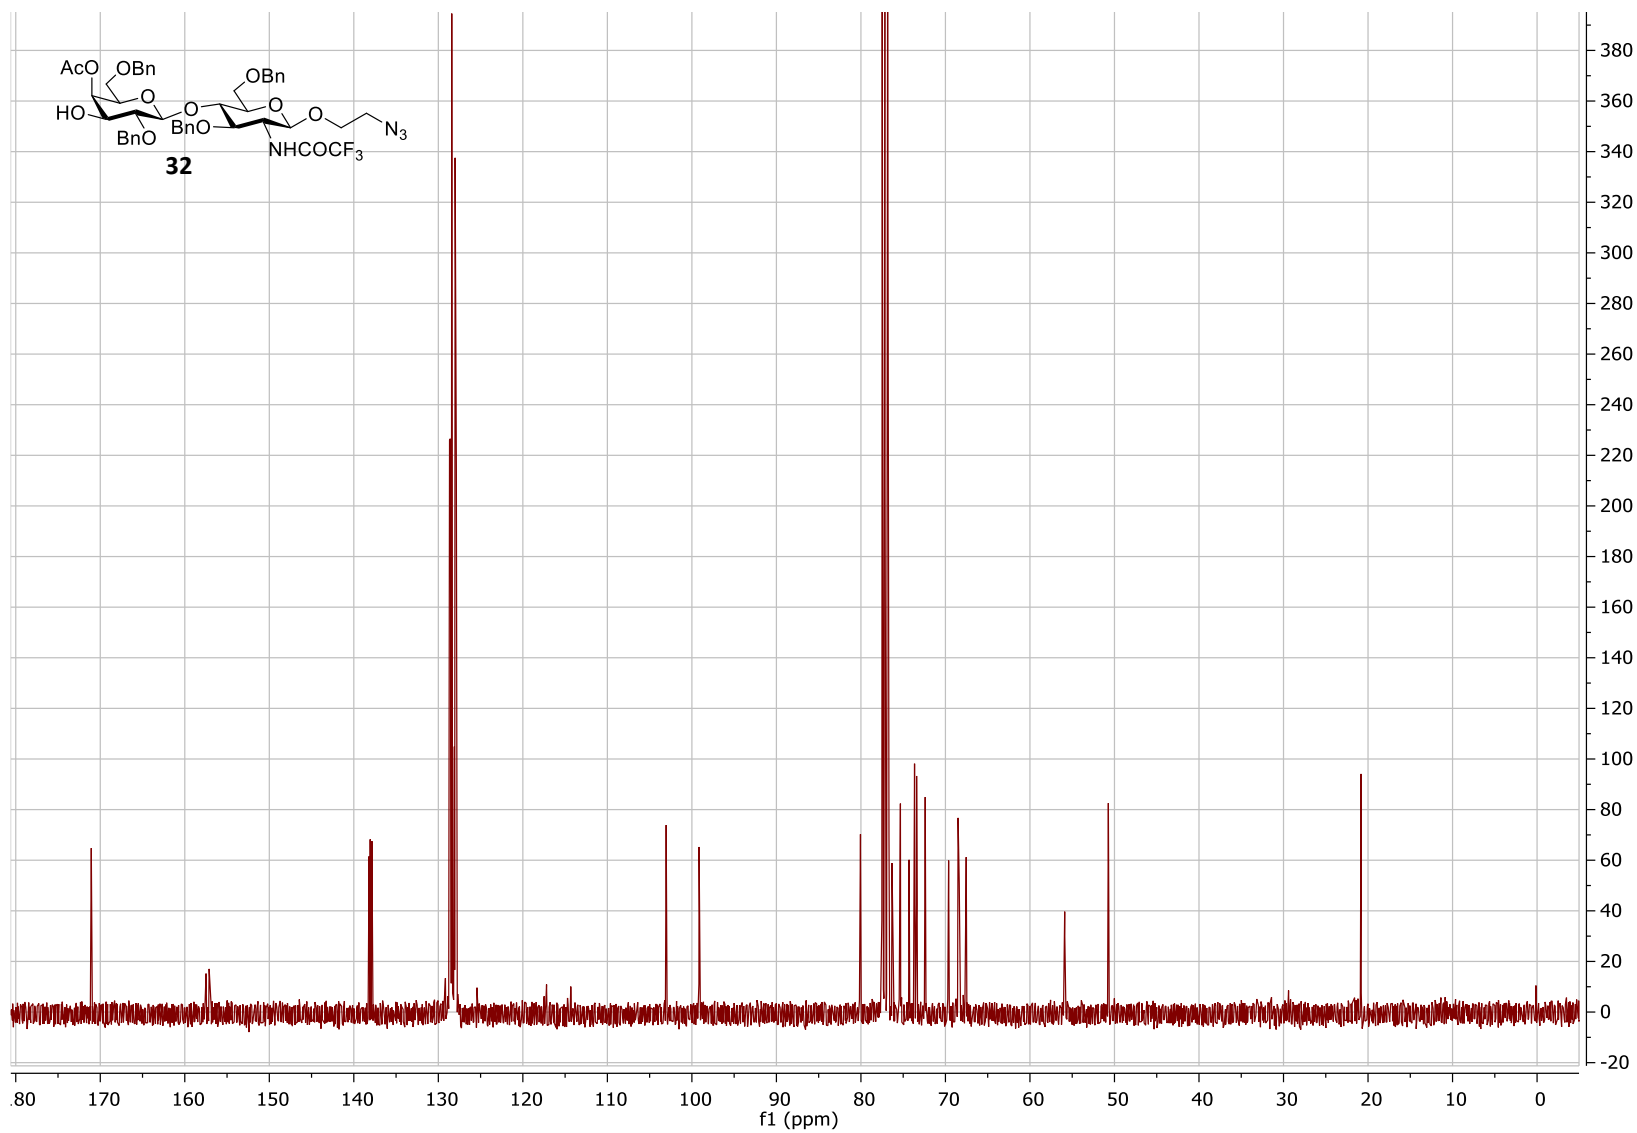

Compound 33:  
<sup>1</sup>H NMR

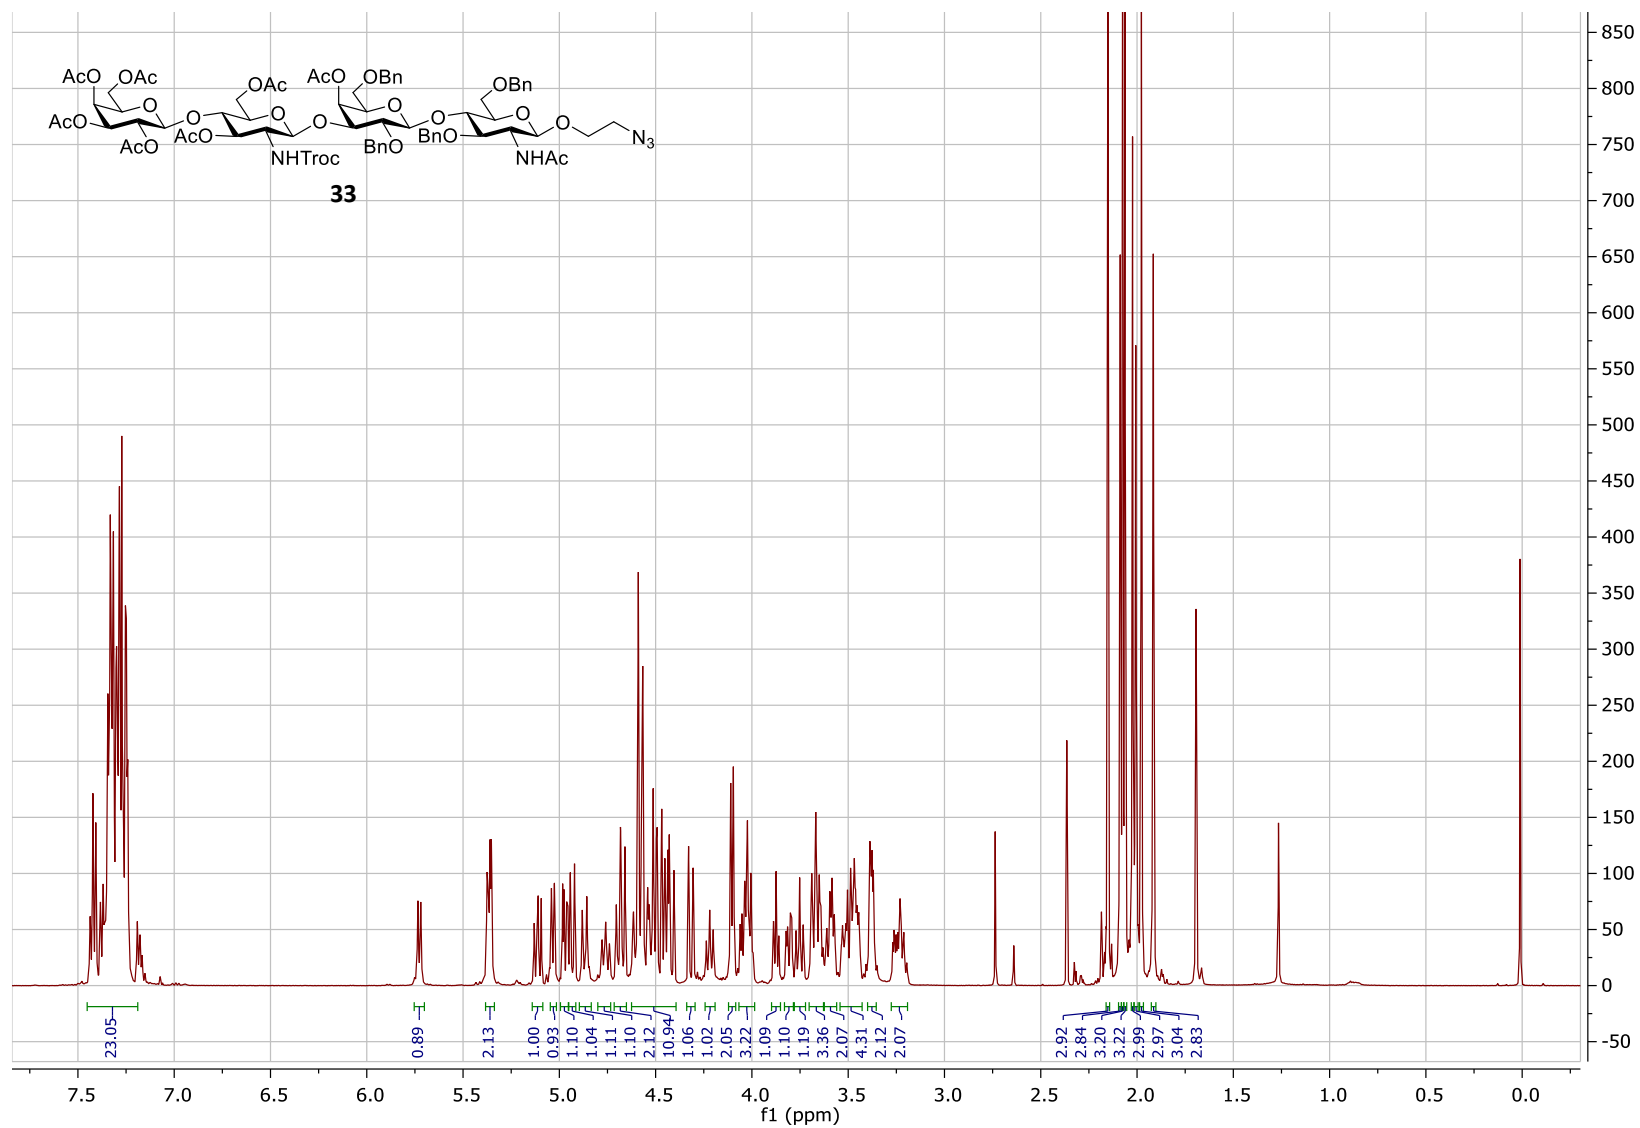

Compound **33**:  
<sup>13</sup>C NMR

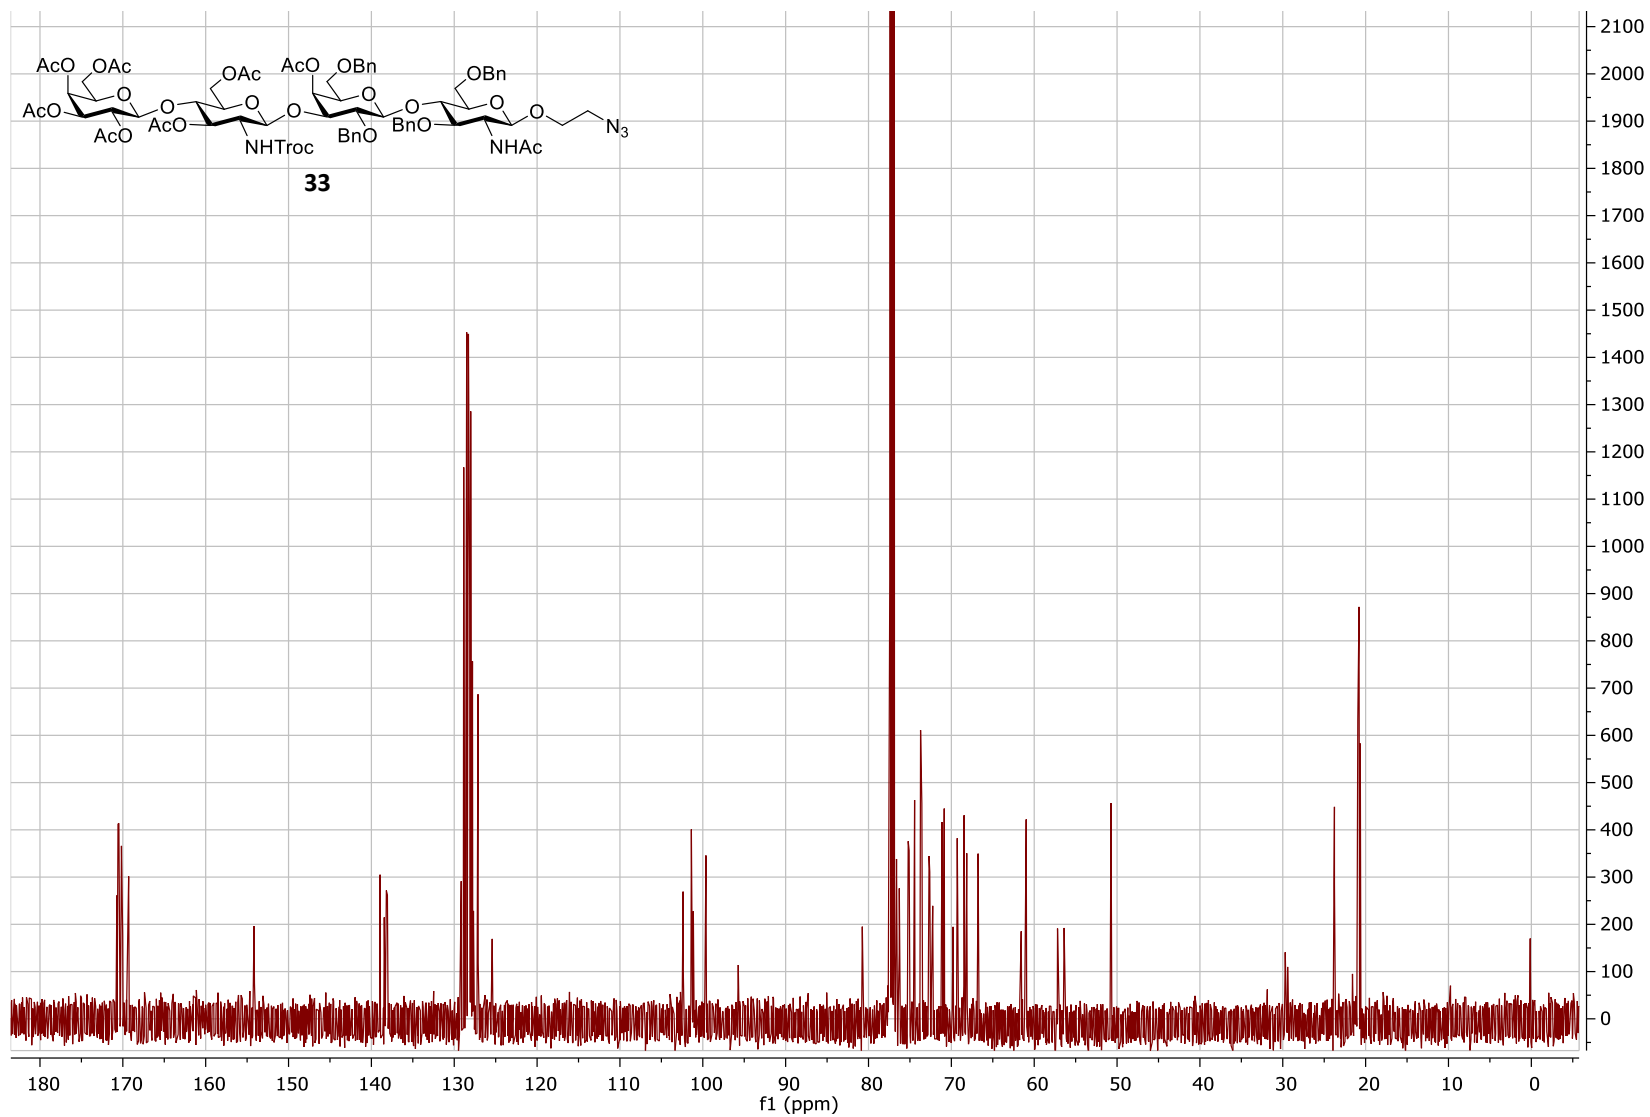

Compound **34**:  
<sup>1</sup>H NMR

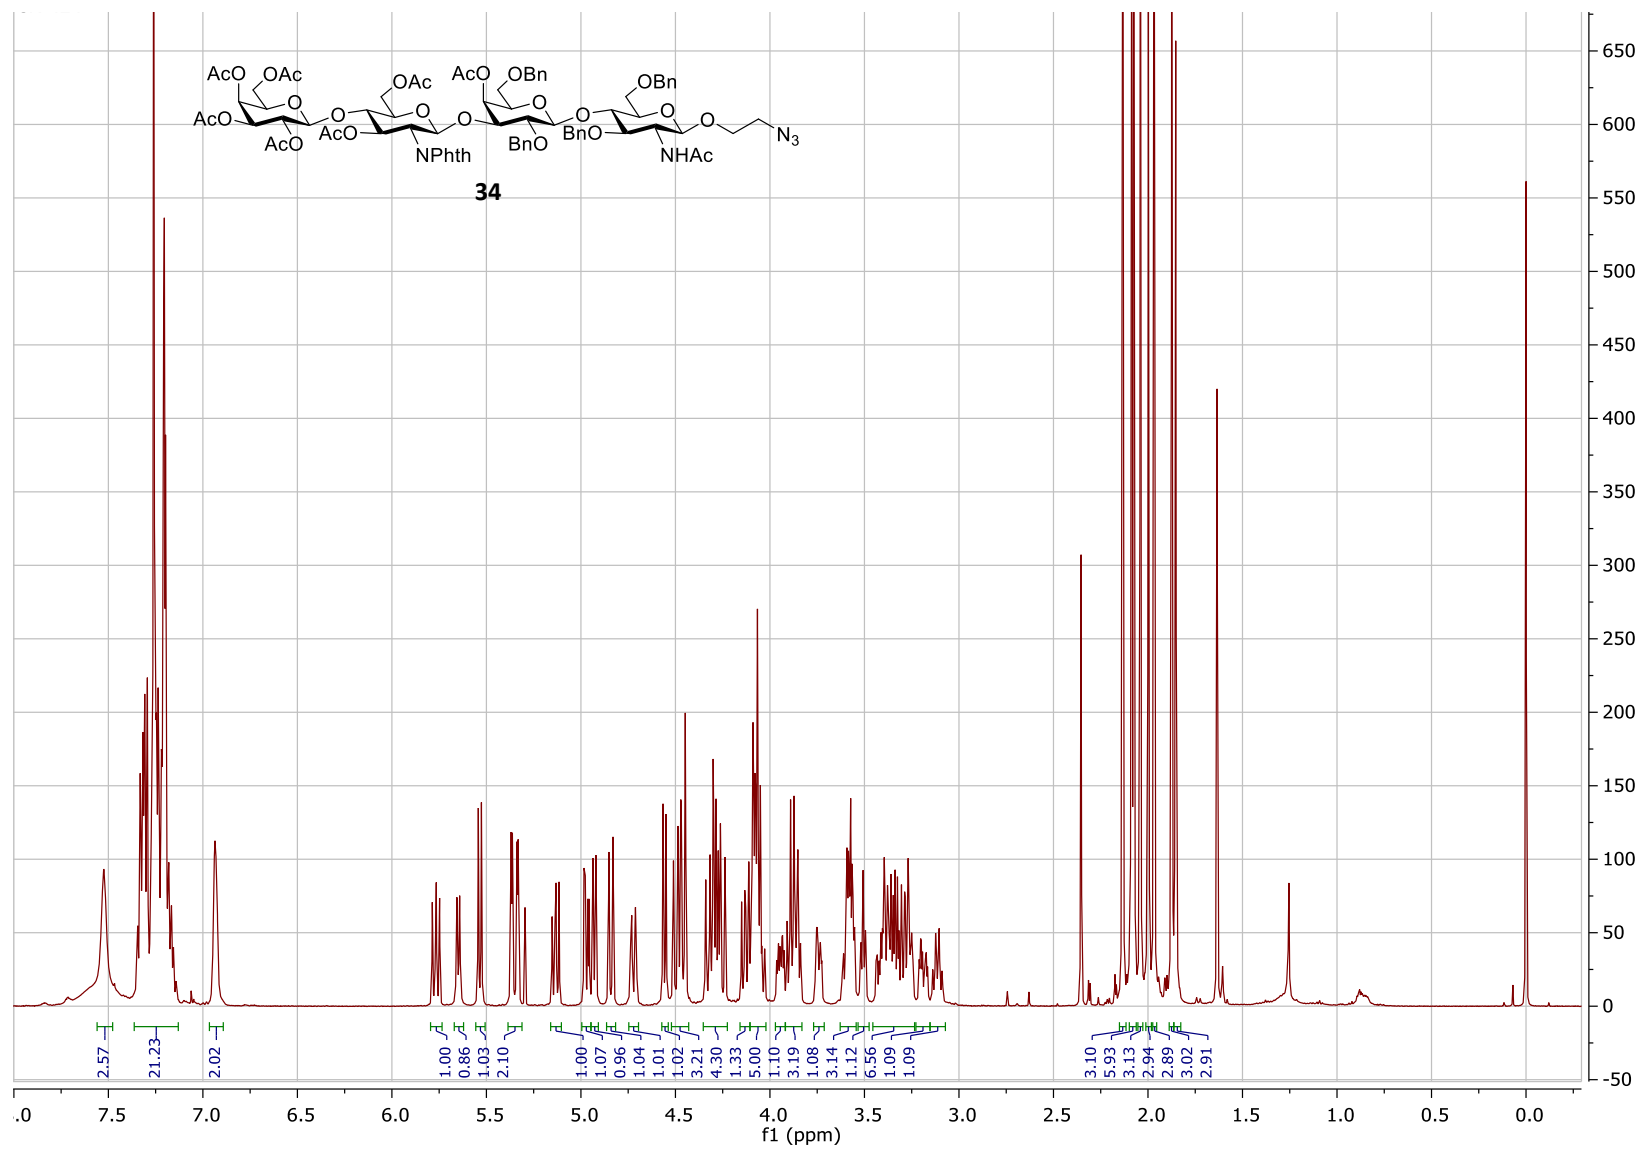

Compound **34**:  
<sup>13</sup>C NMR

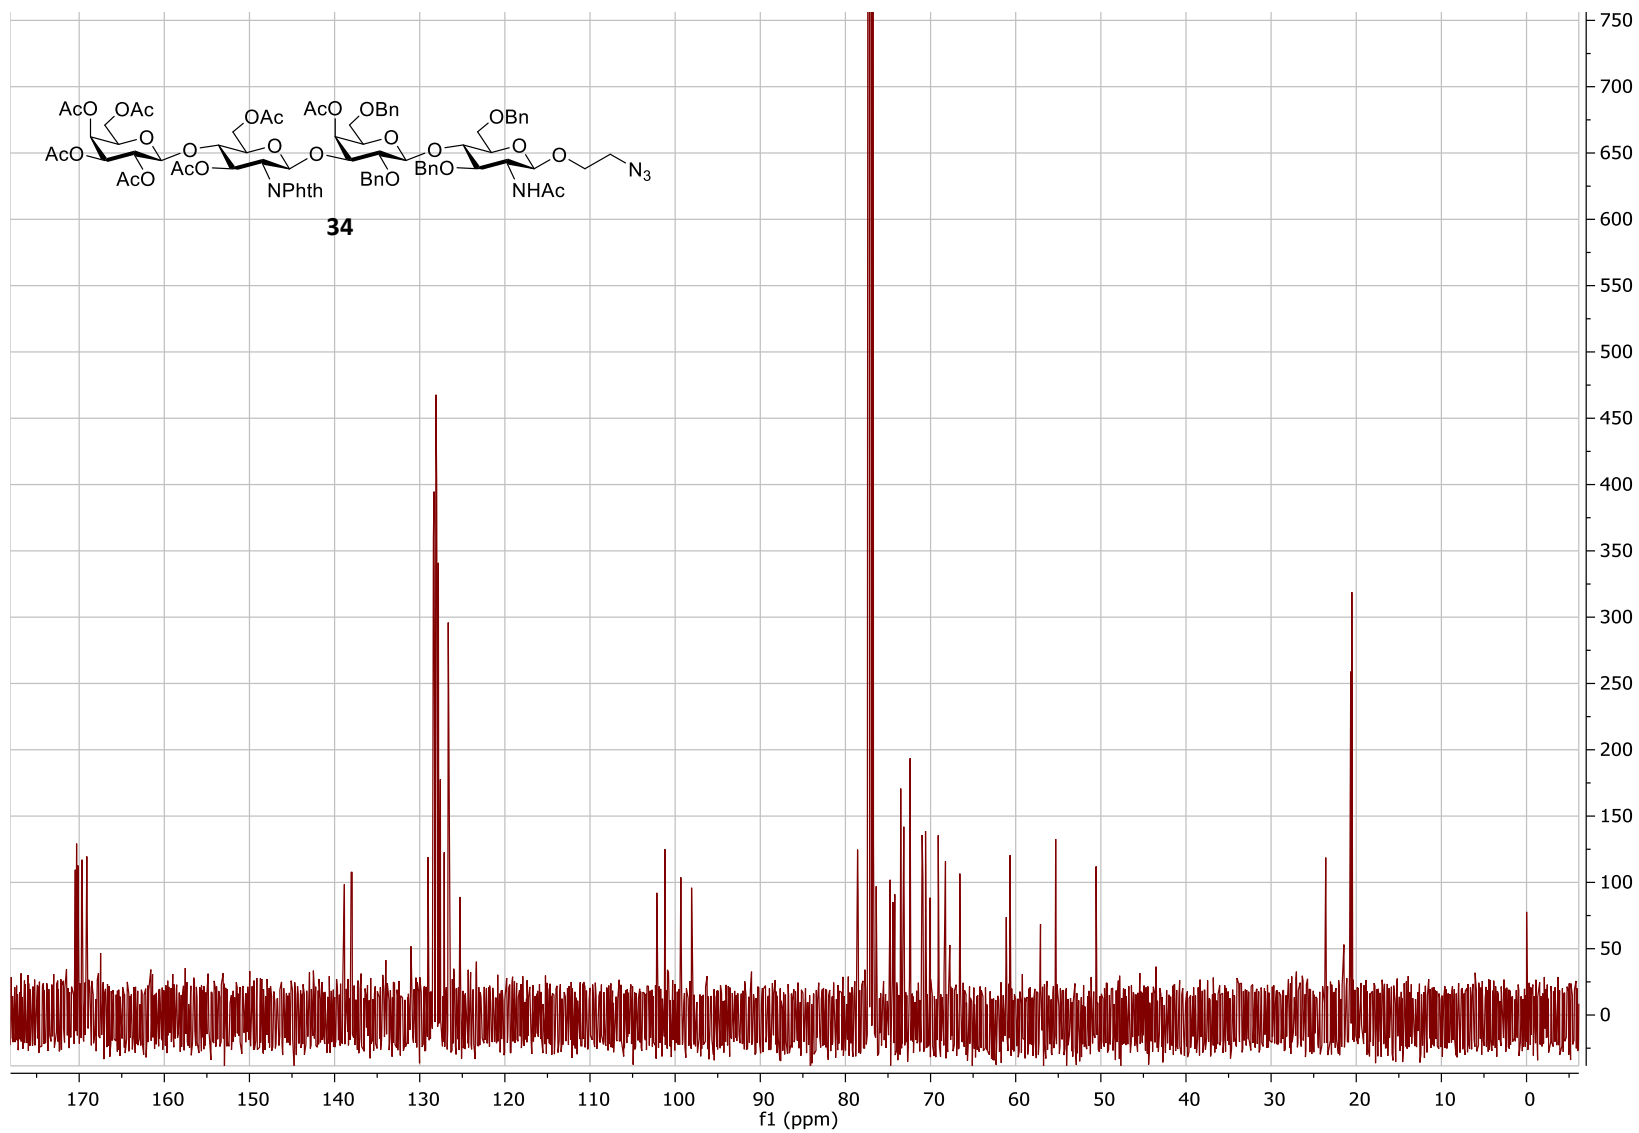



Compound 35:  
<sup>1</sup>H NMR

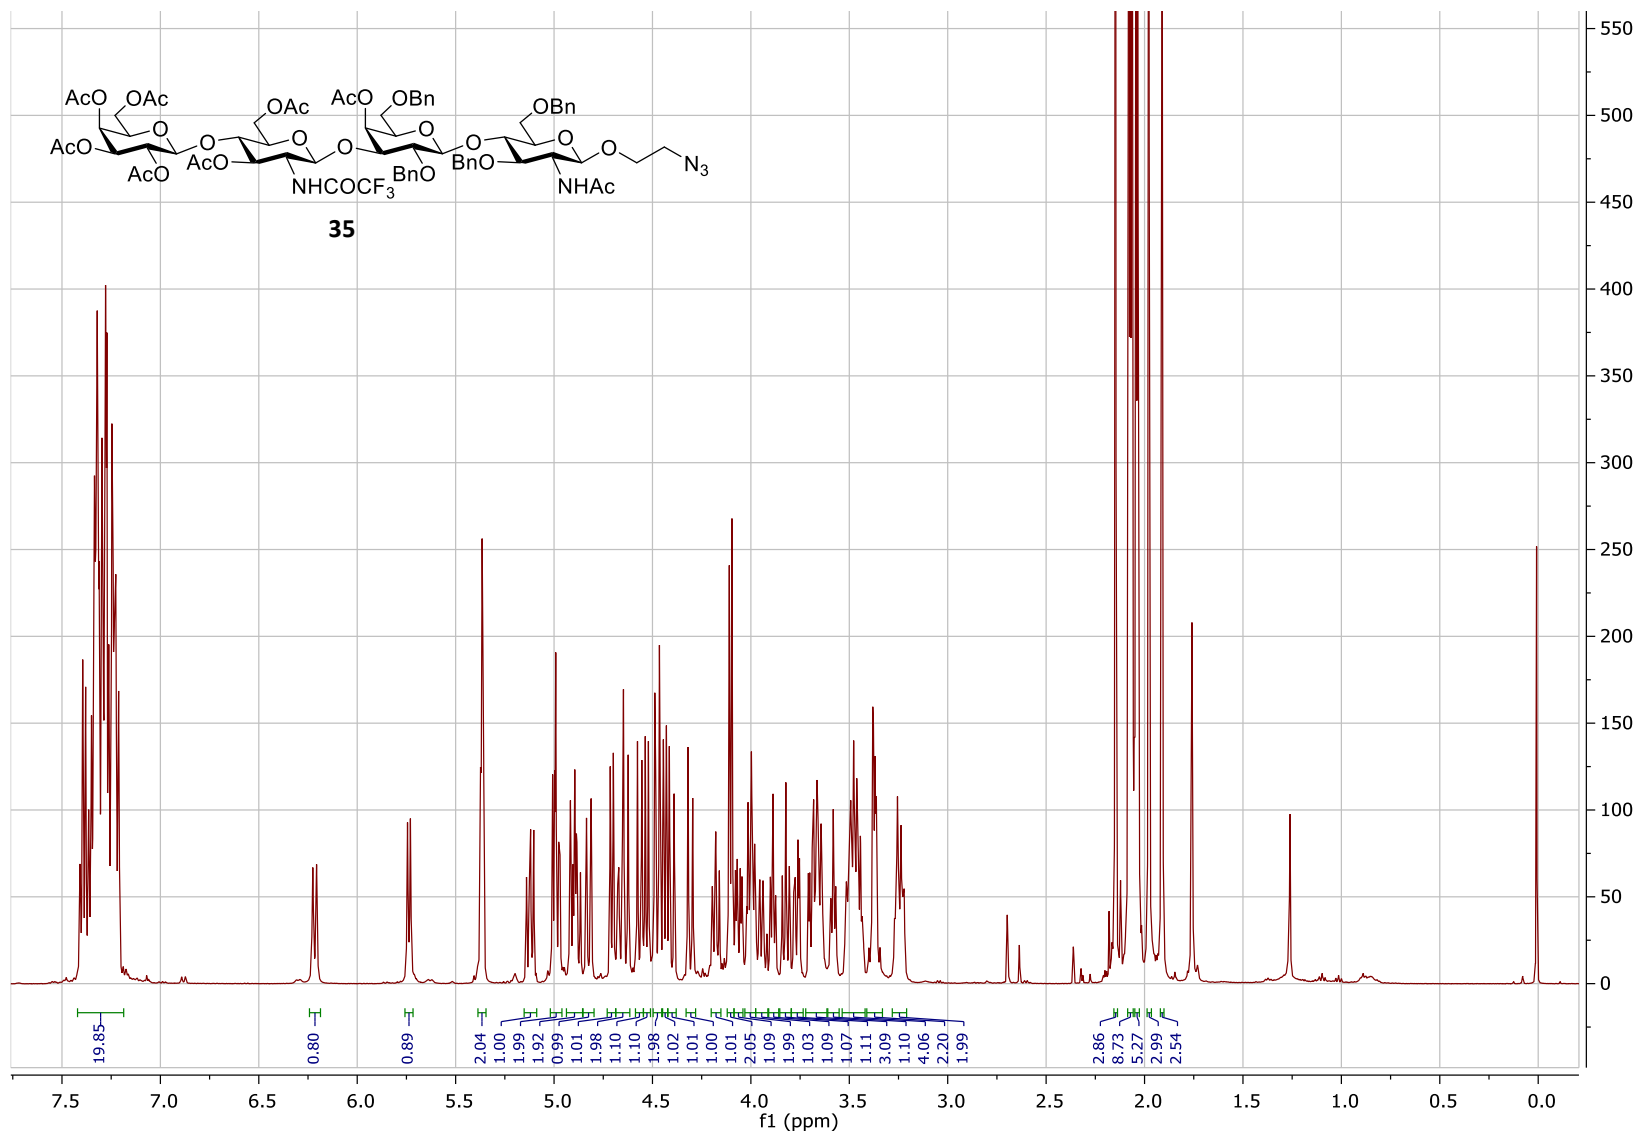

Compound 35:  
<sup>13</sup>C NMR

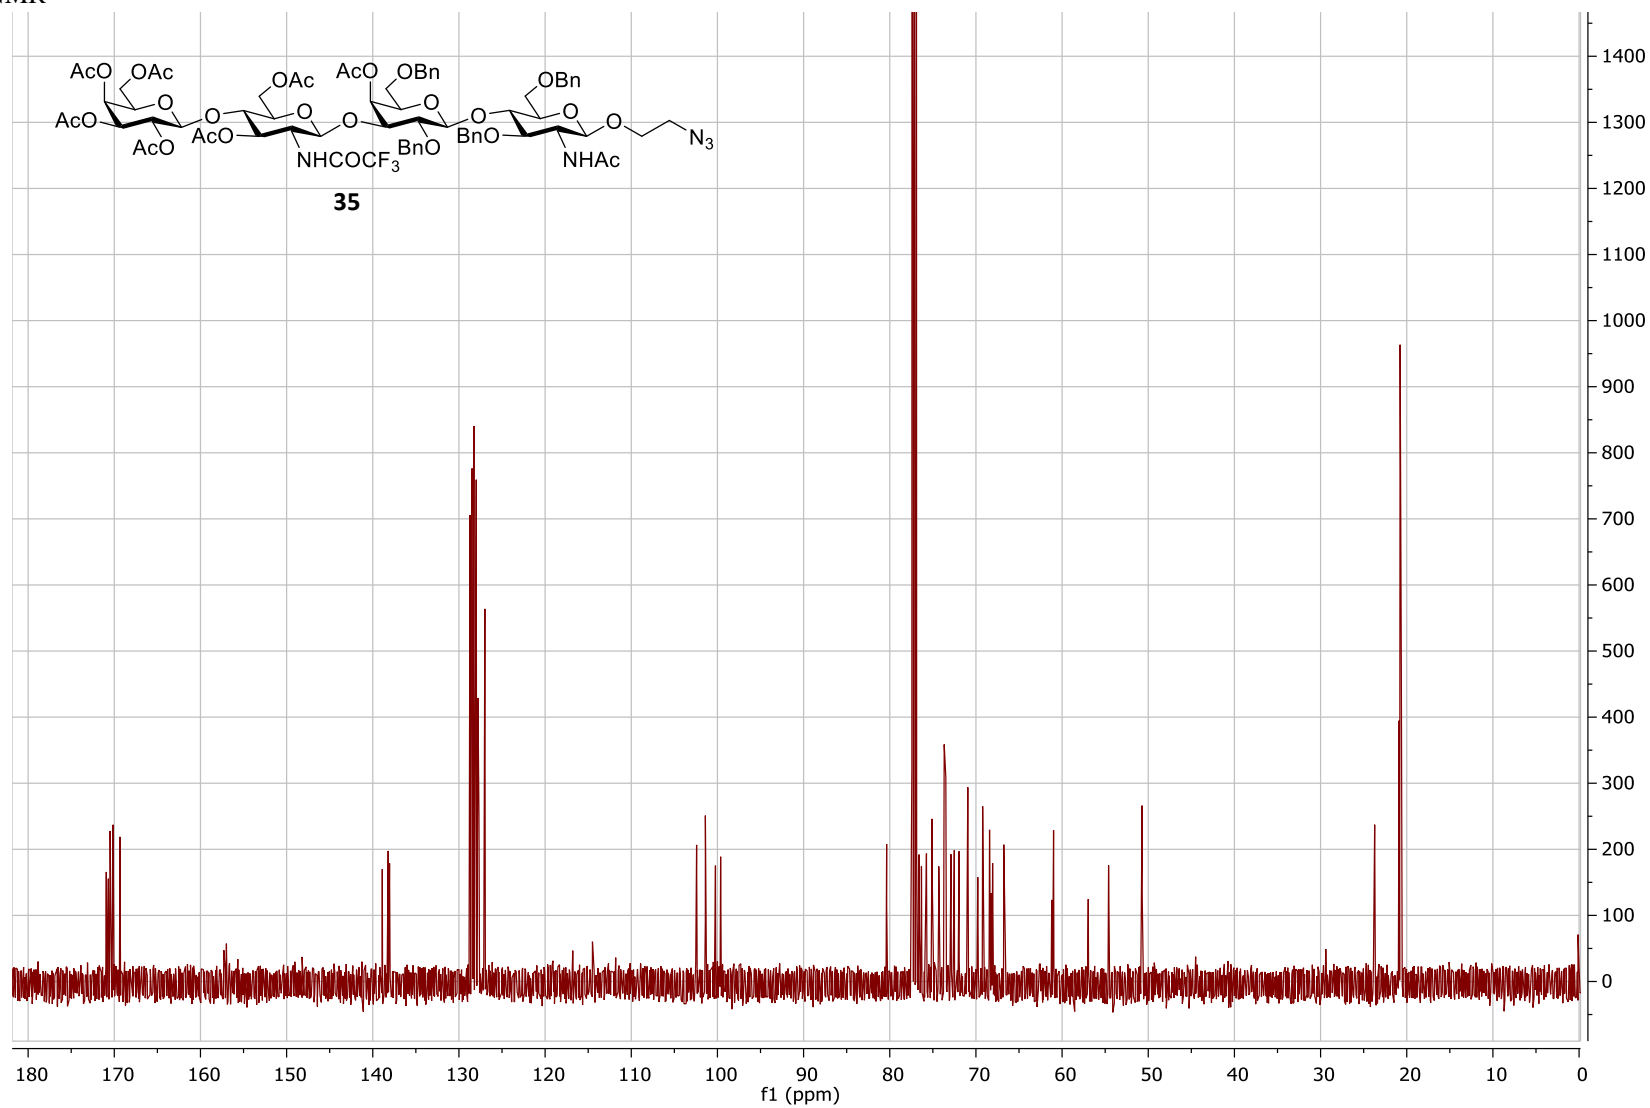

Compound **36**:  
<sup>1</sup>H NMR

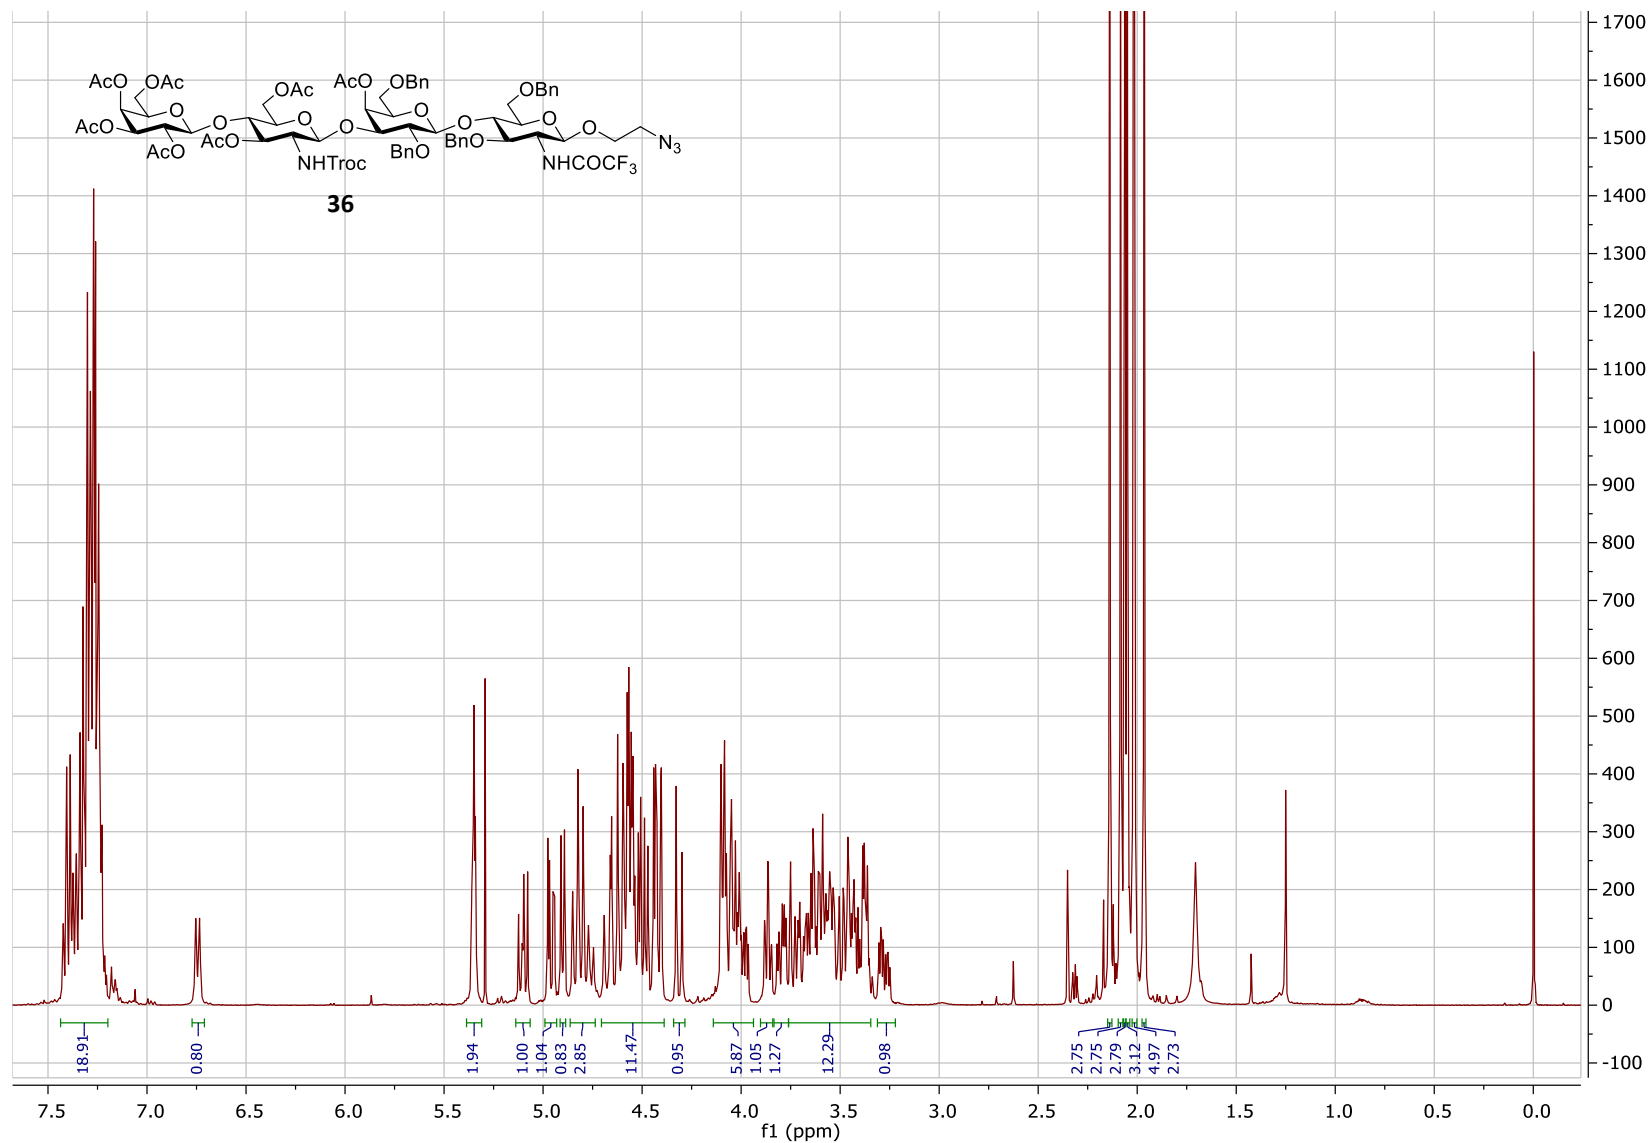

Compound **36**:  
<sup>13</sup>C NMR

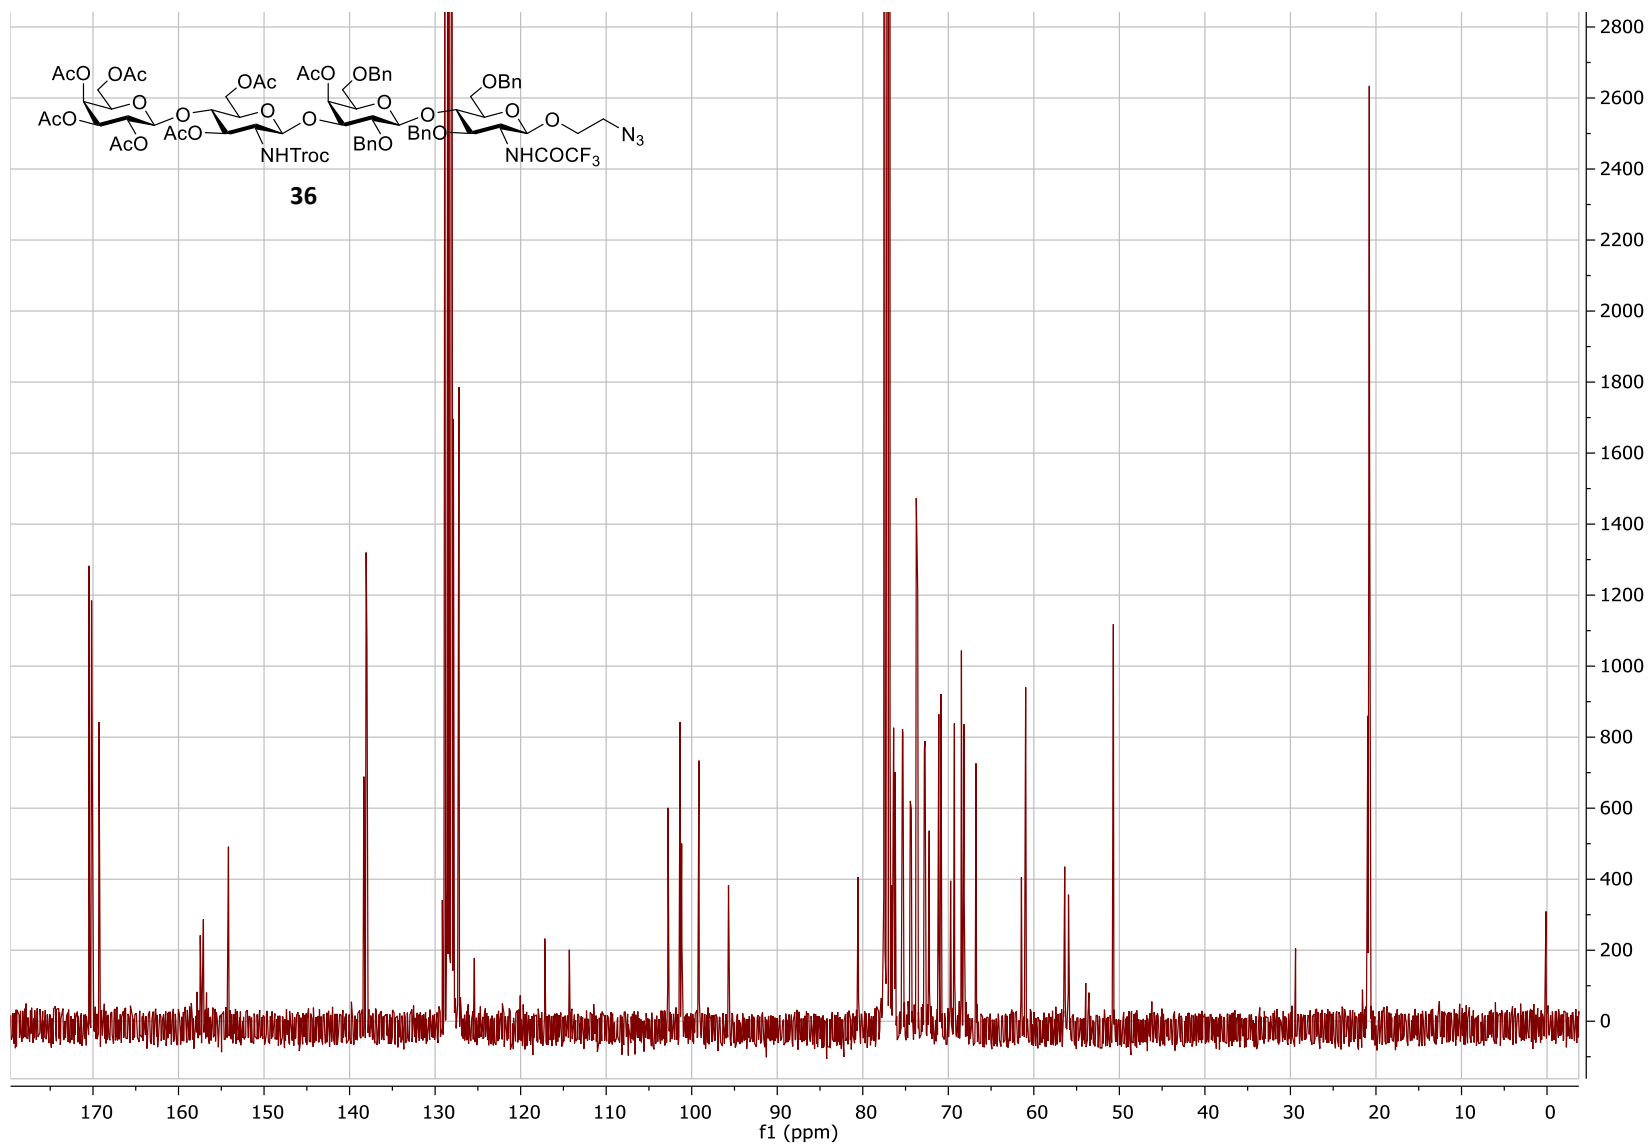

Compound 1:  
<sup>1</sup>H NMR

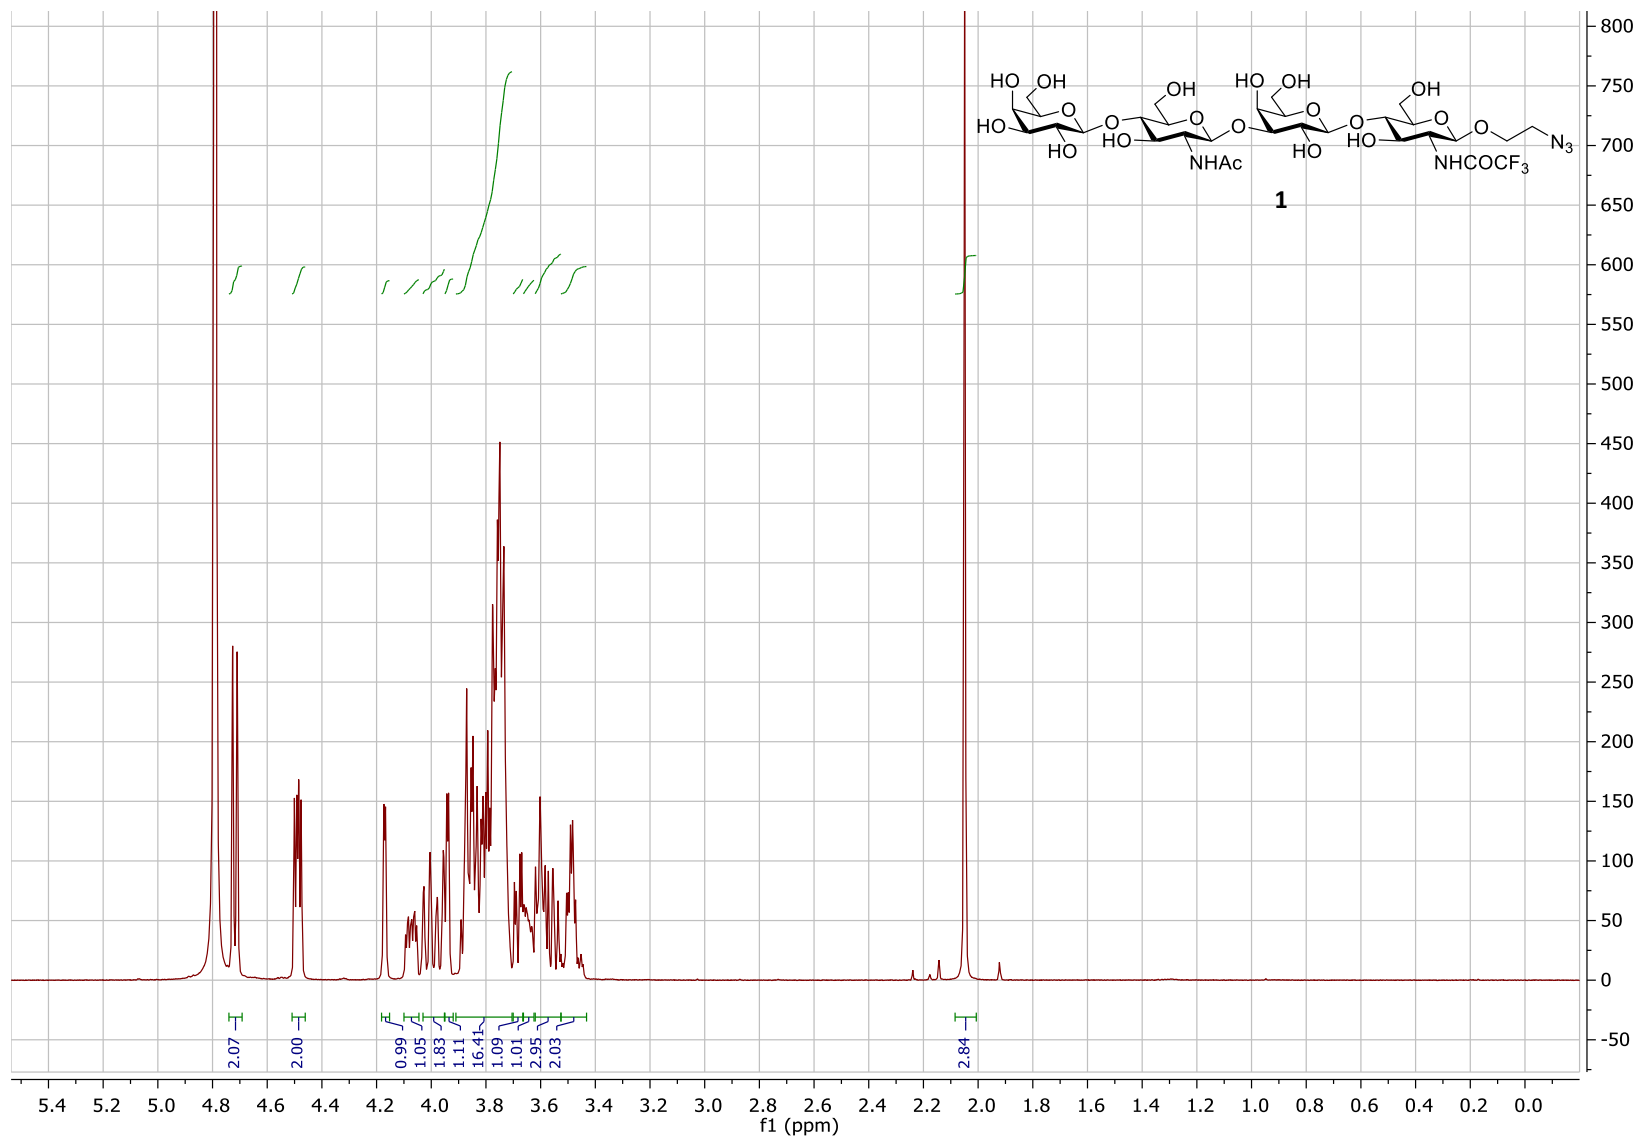

Compound 1:  
<sup>13</sup>C NMR

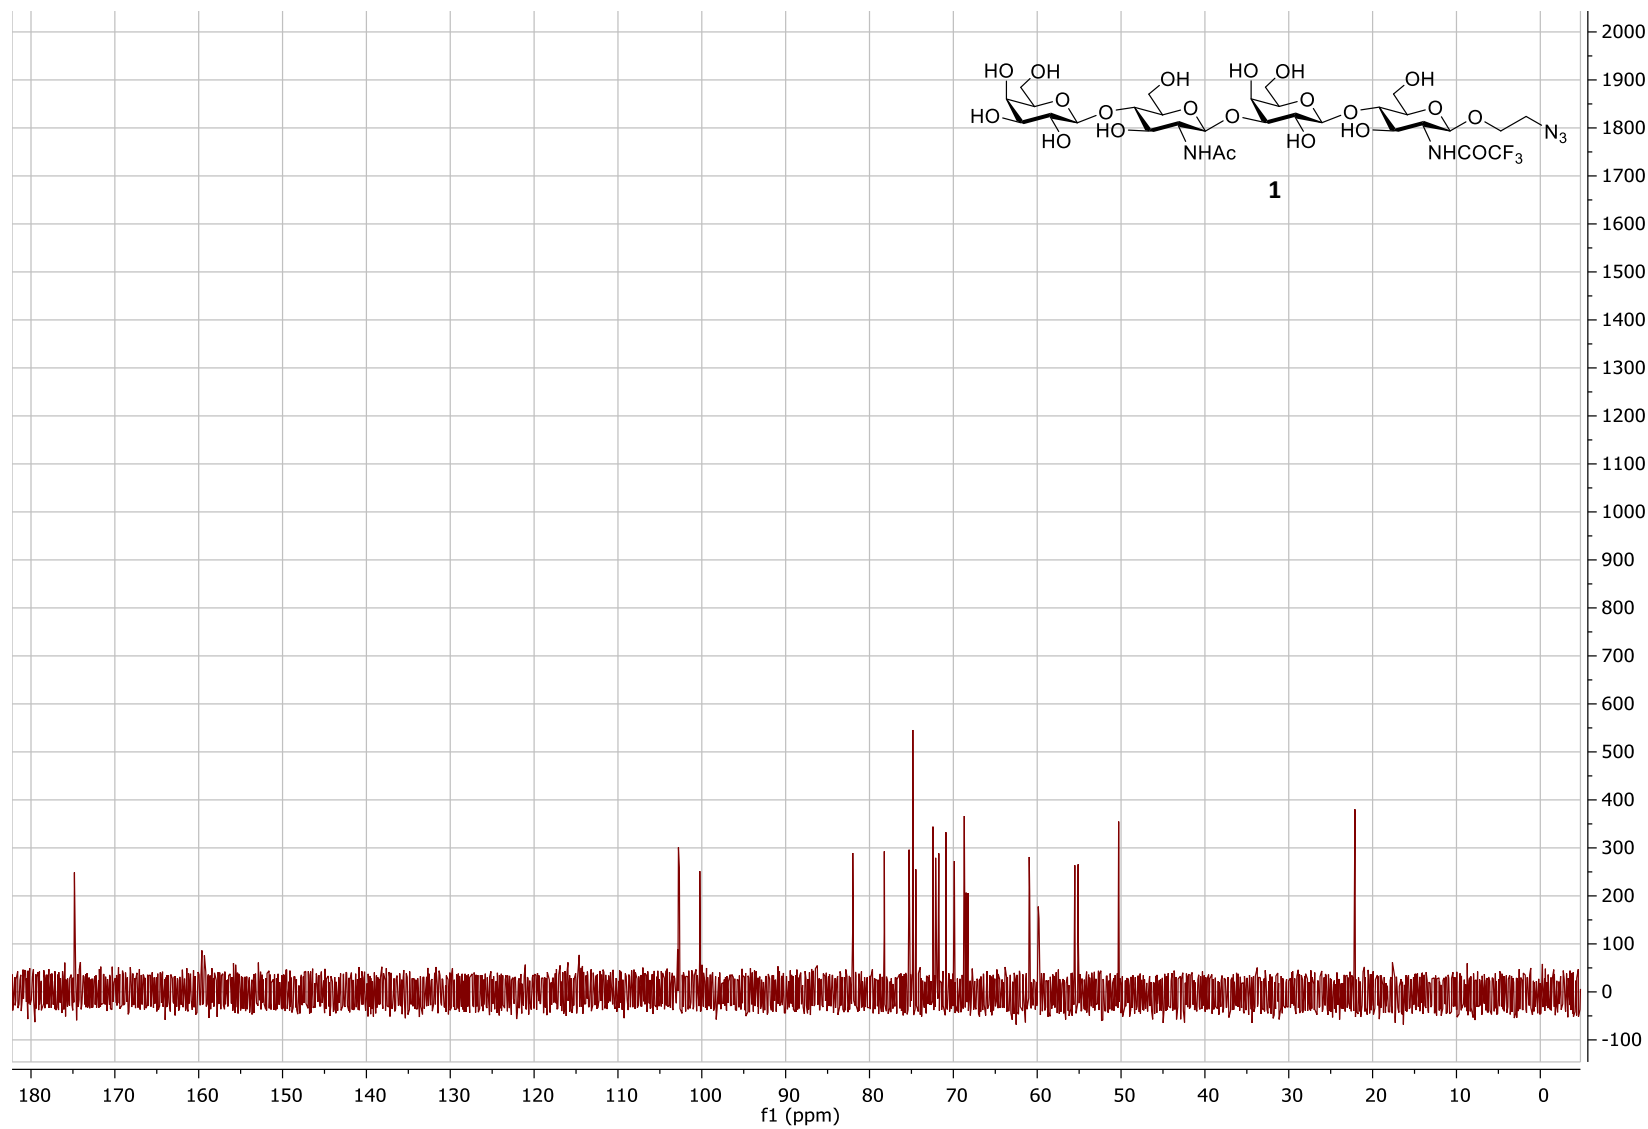

Compound 2:  
<sup>1</sup>H NMR

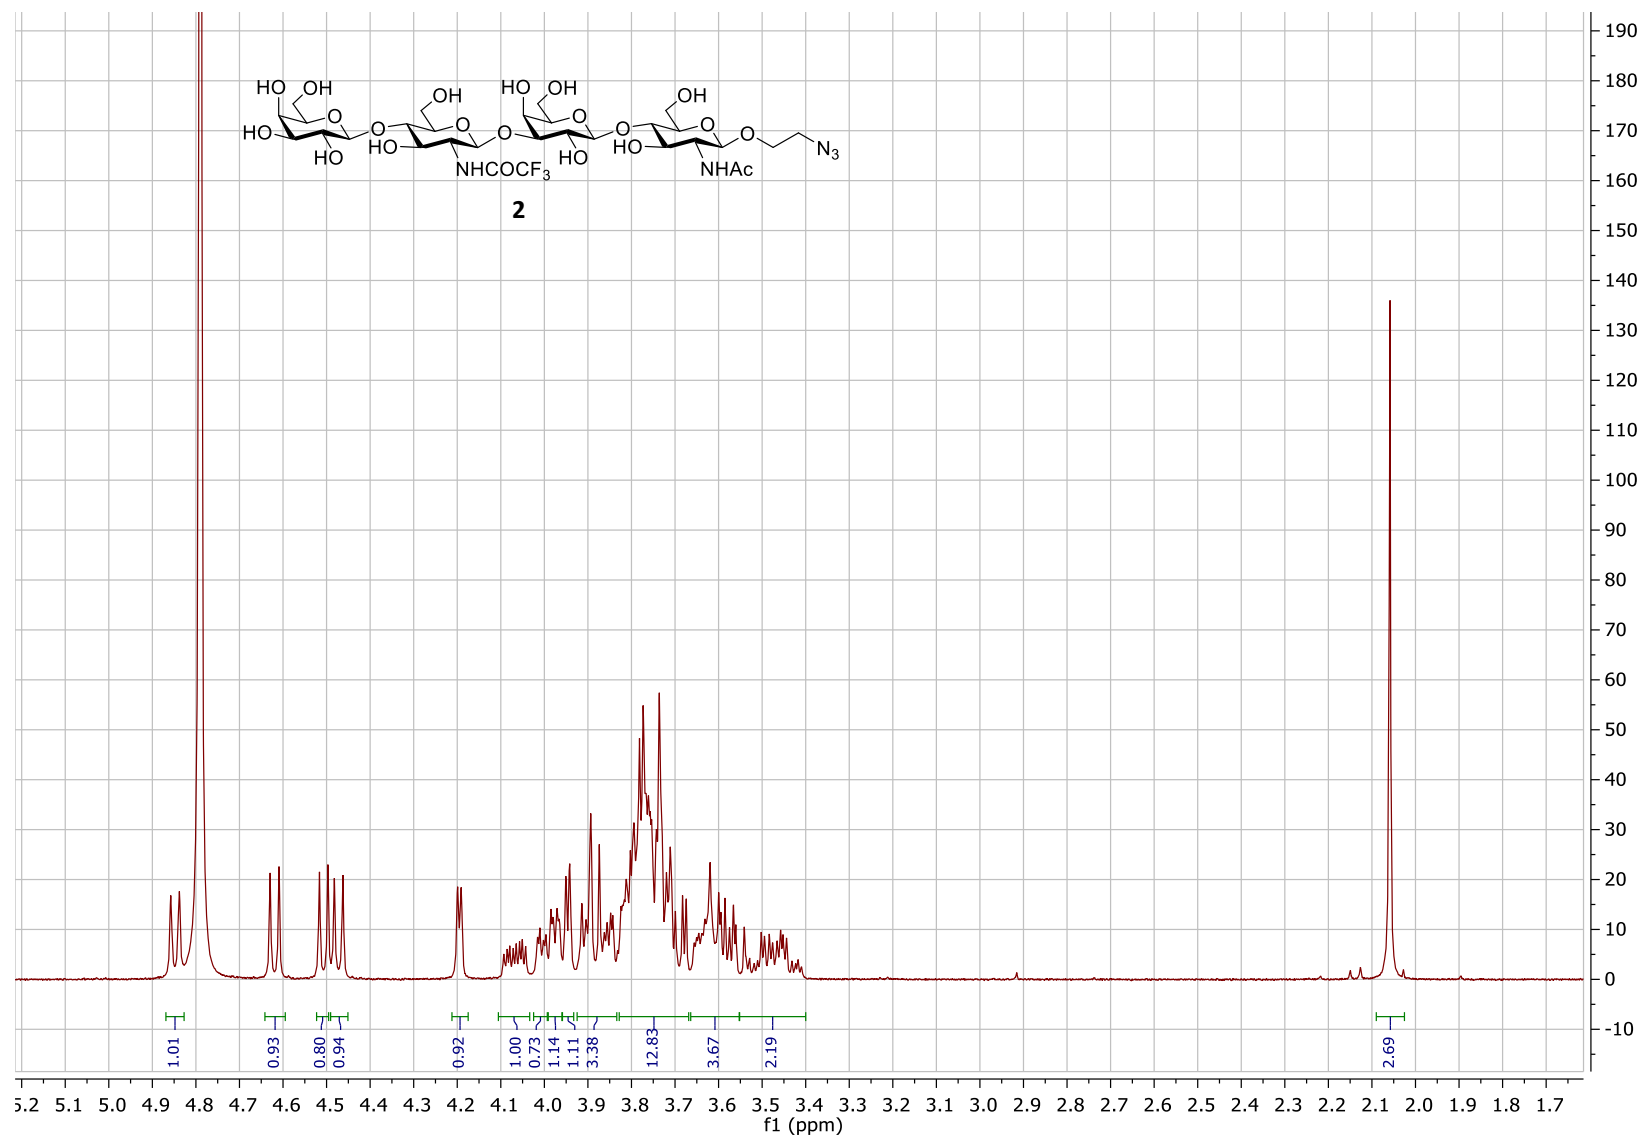

Compound 2:  
<sup>13</sup>C NMR

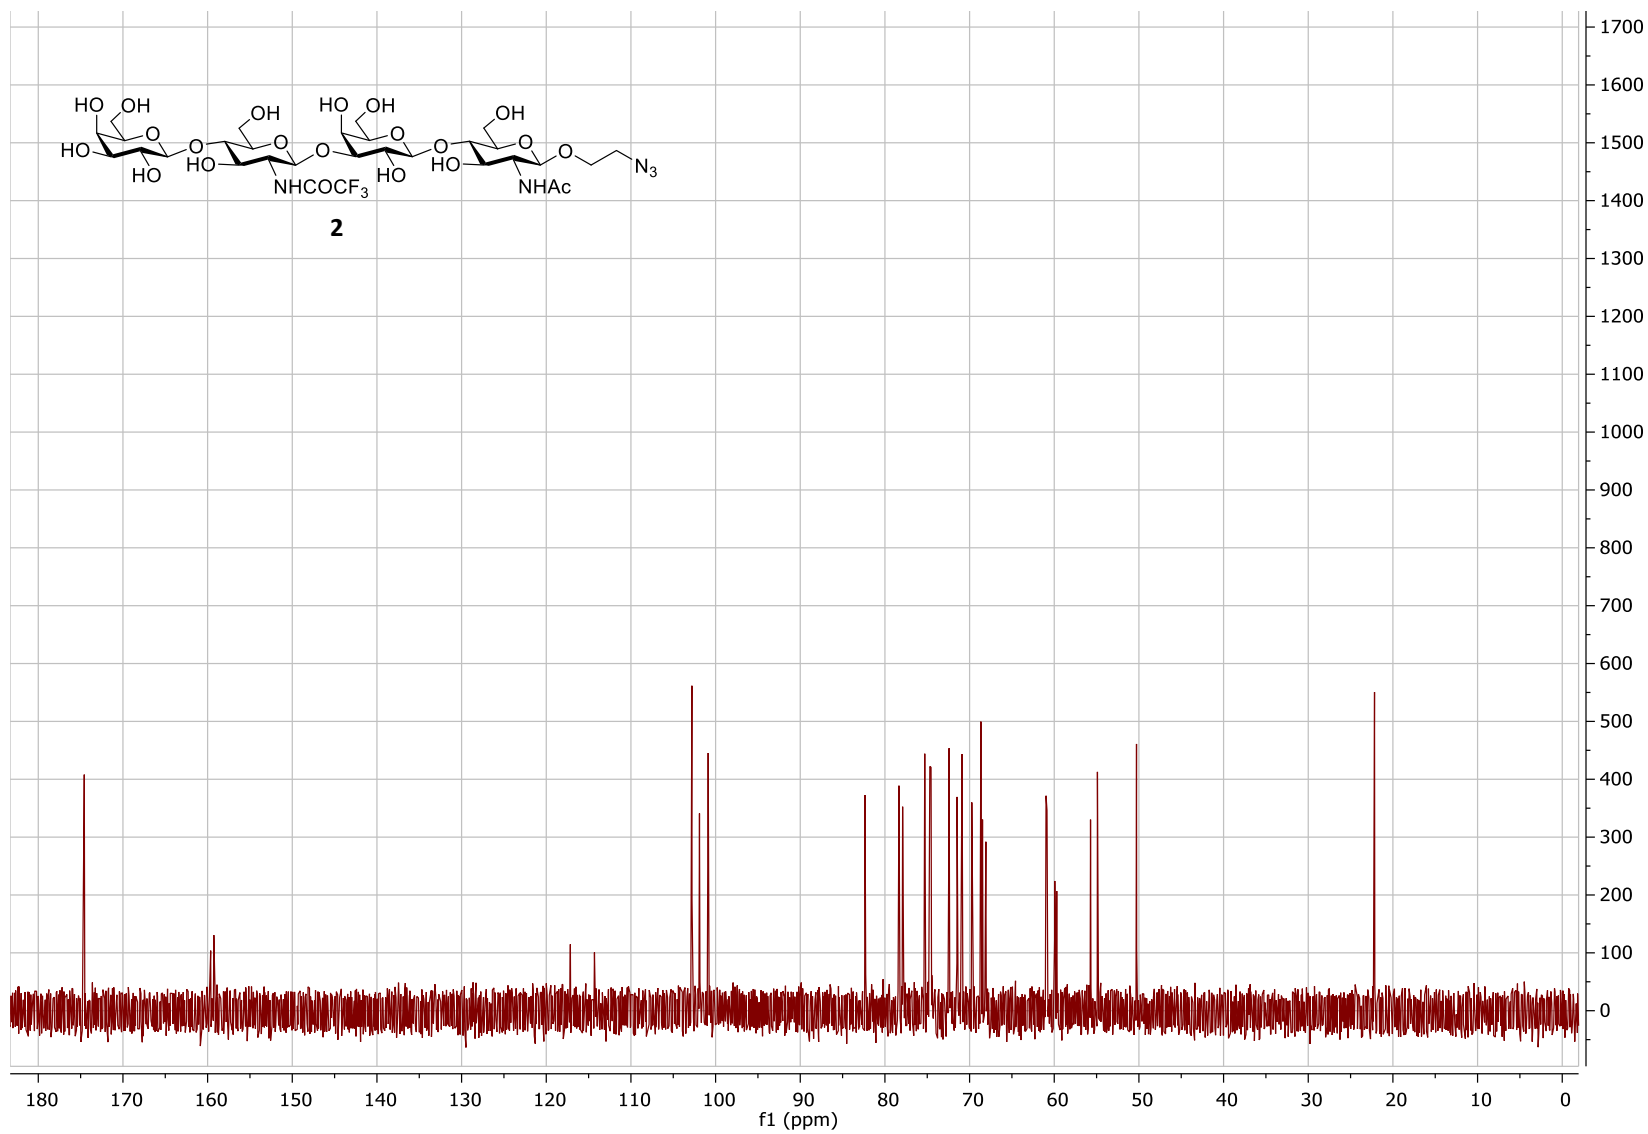



Compound **40**:  
<sup>1</sup>H NMR

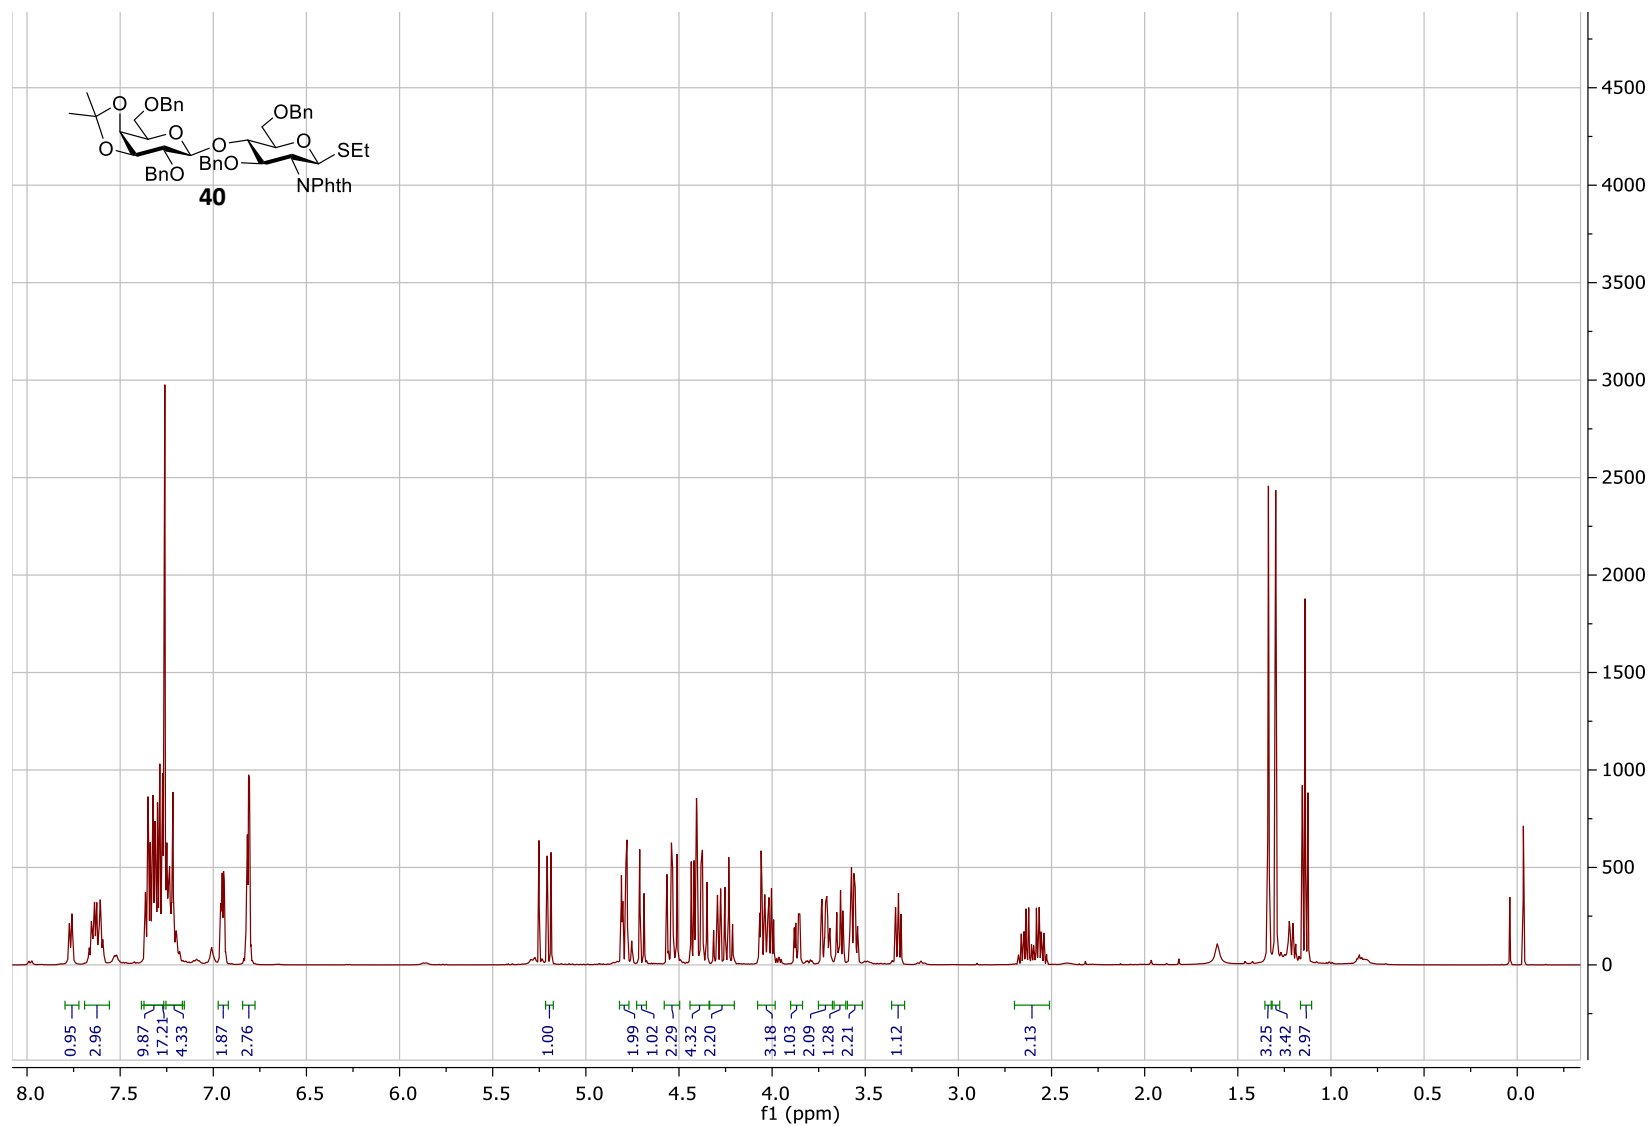

Compound **40**:  
<sup>13</sup>C NMR

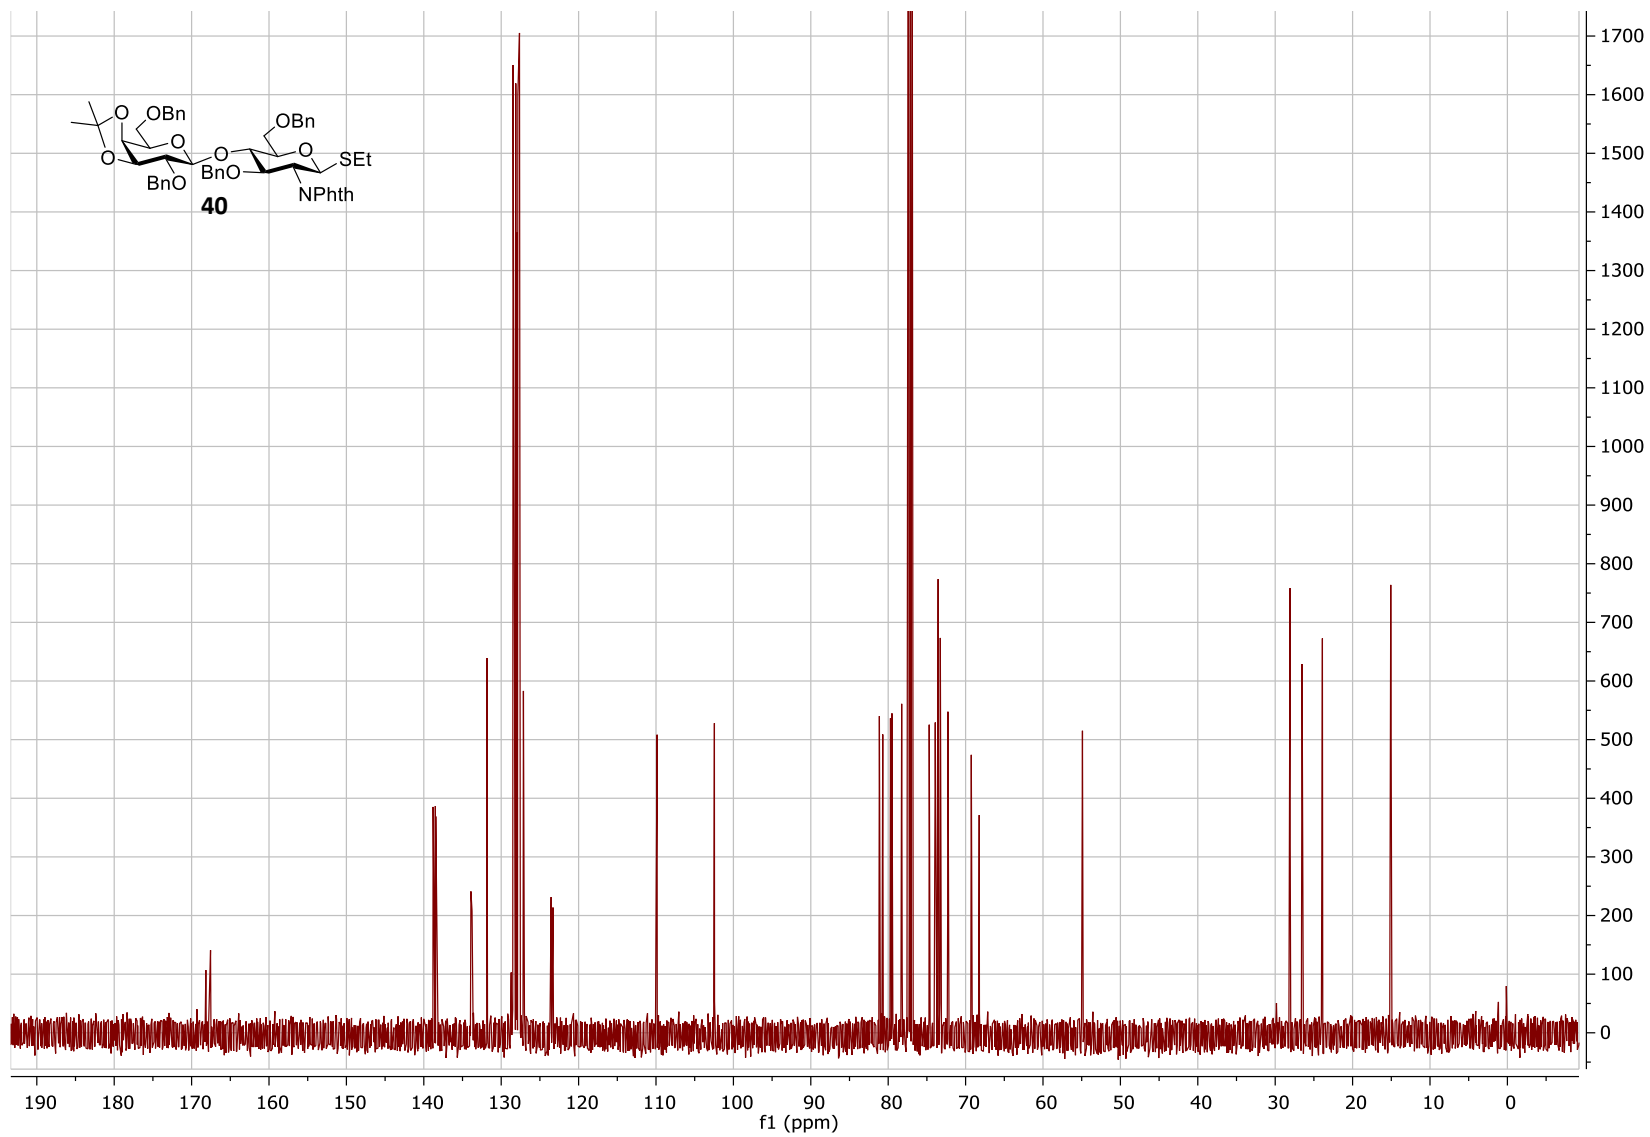



Compound **41**:  
<sup>13</sup>C NMR

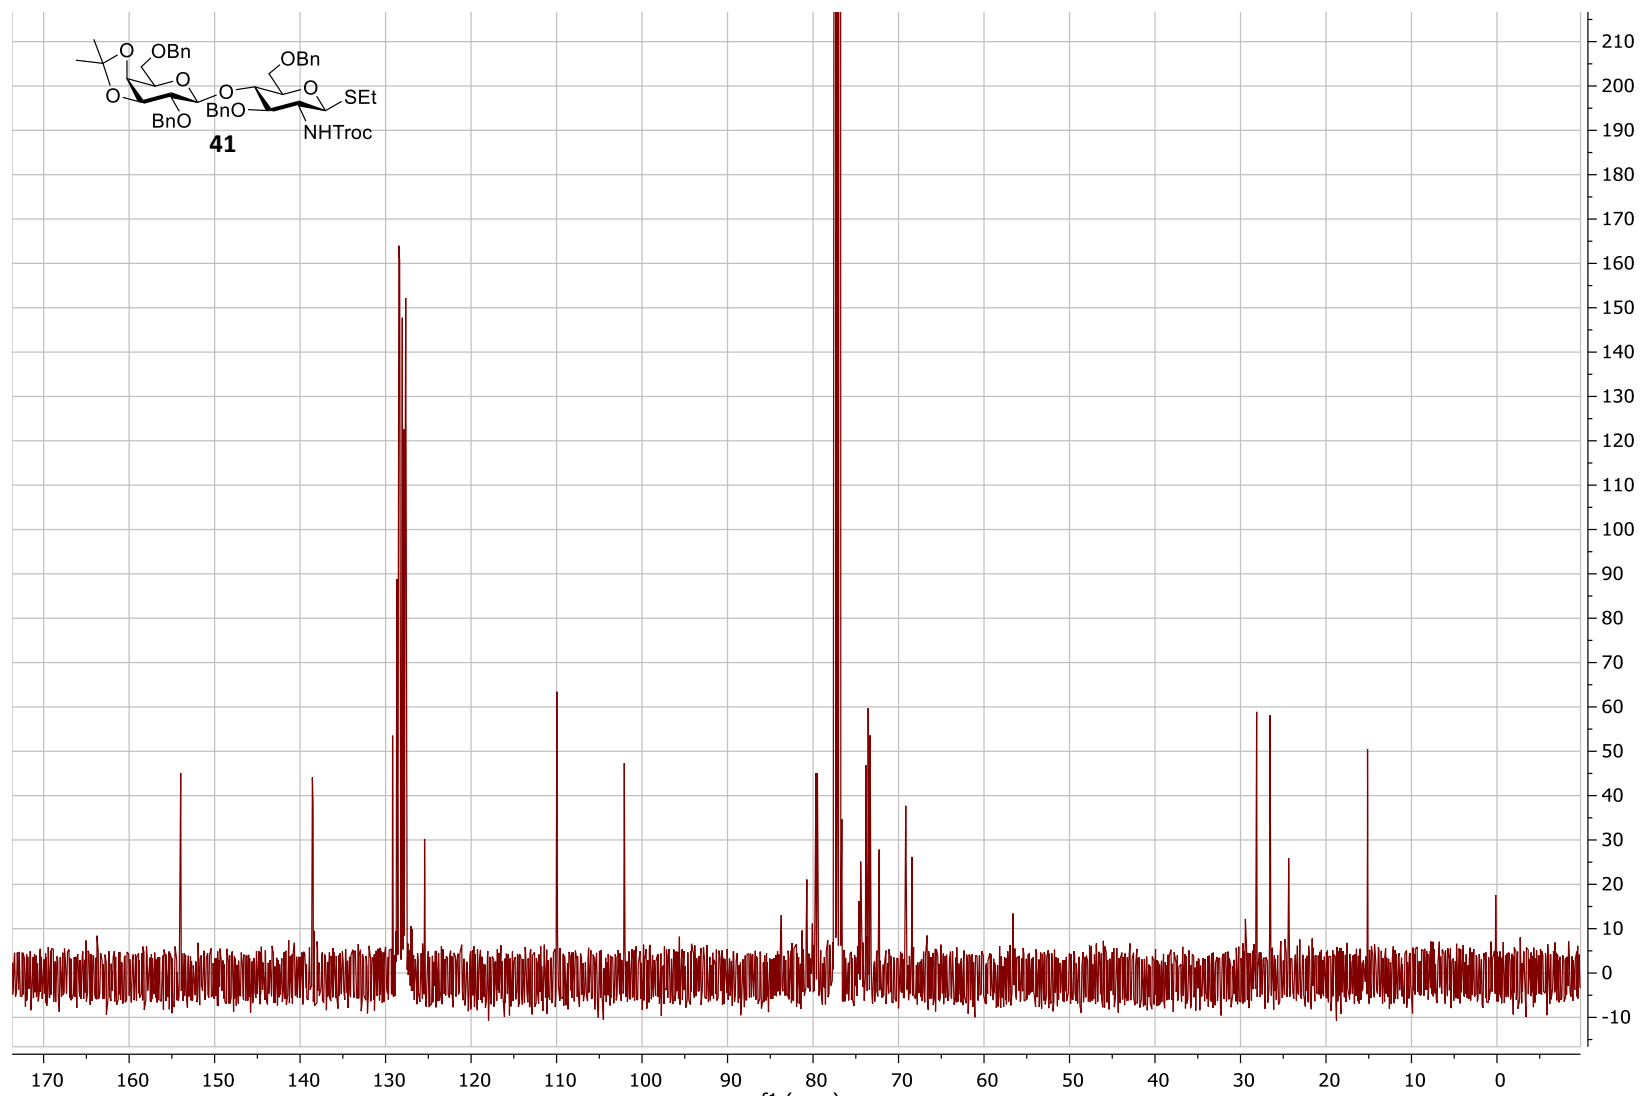

Compound **42**:  
<sup>1</sup>H NMR

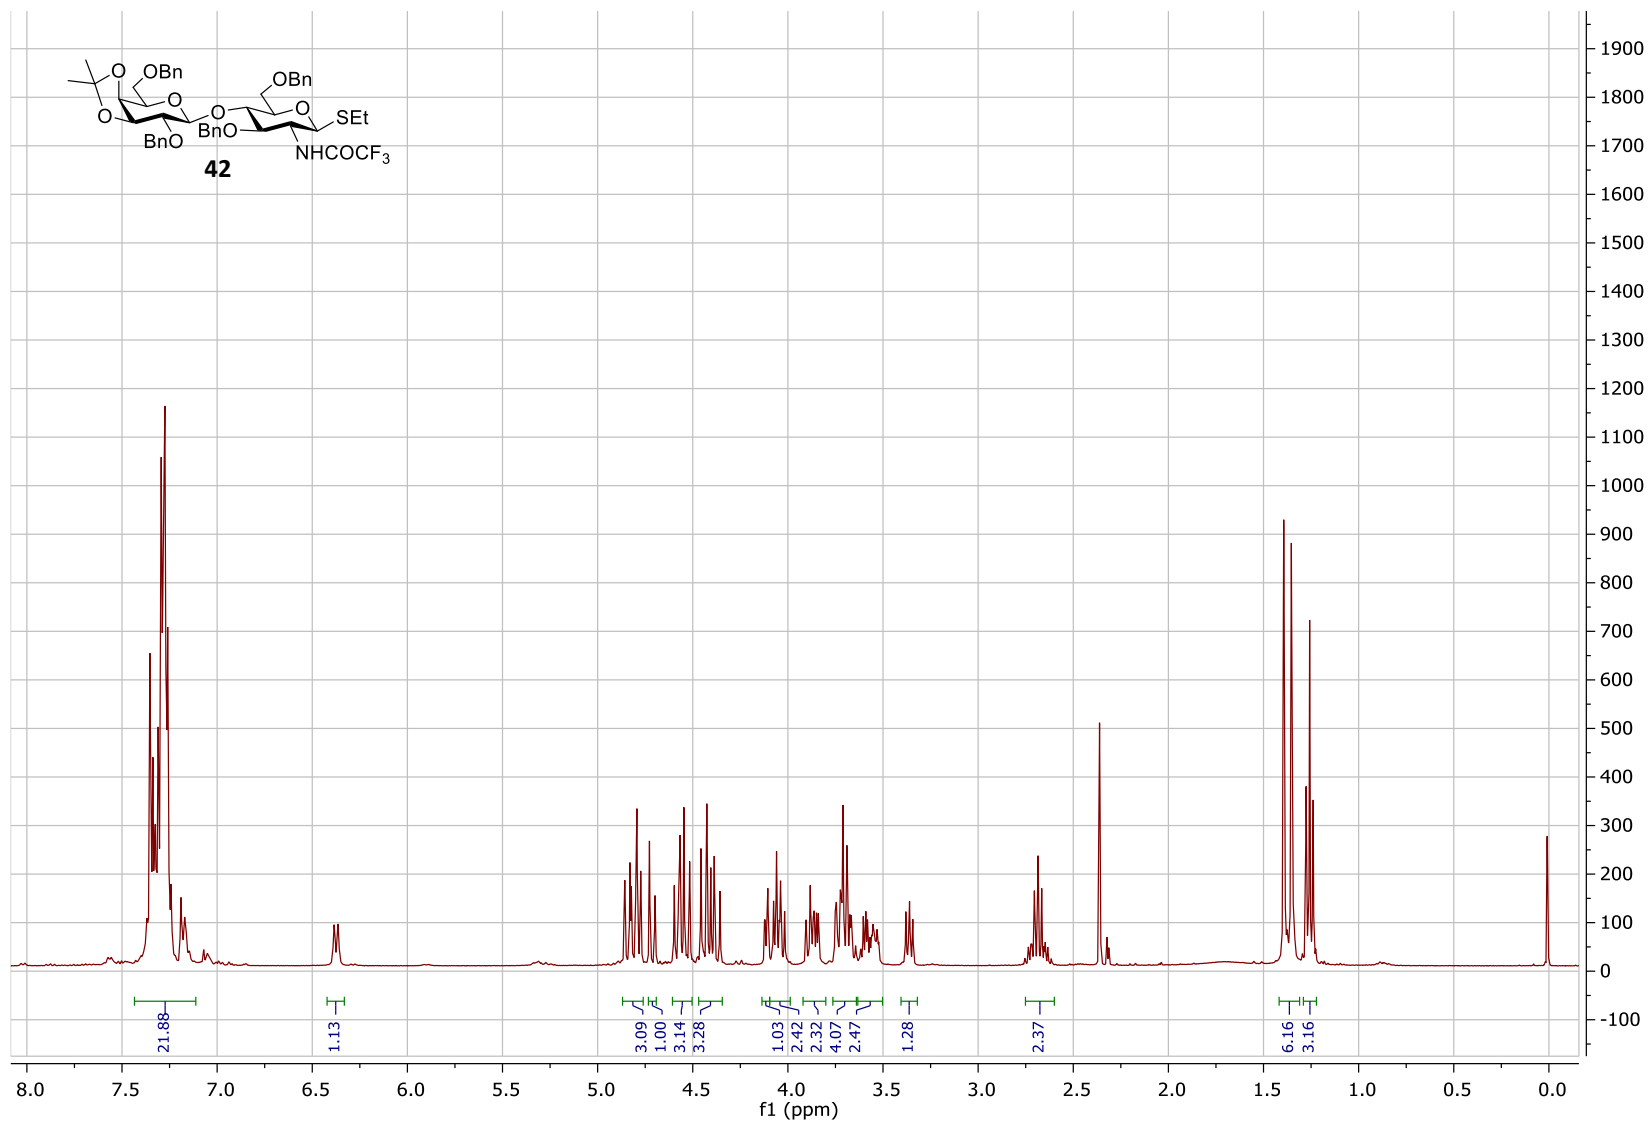

Compound **42**:  
<sup>13</sup>C NMR

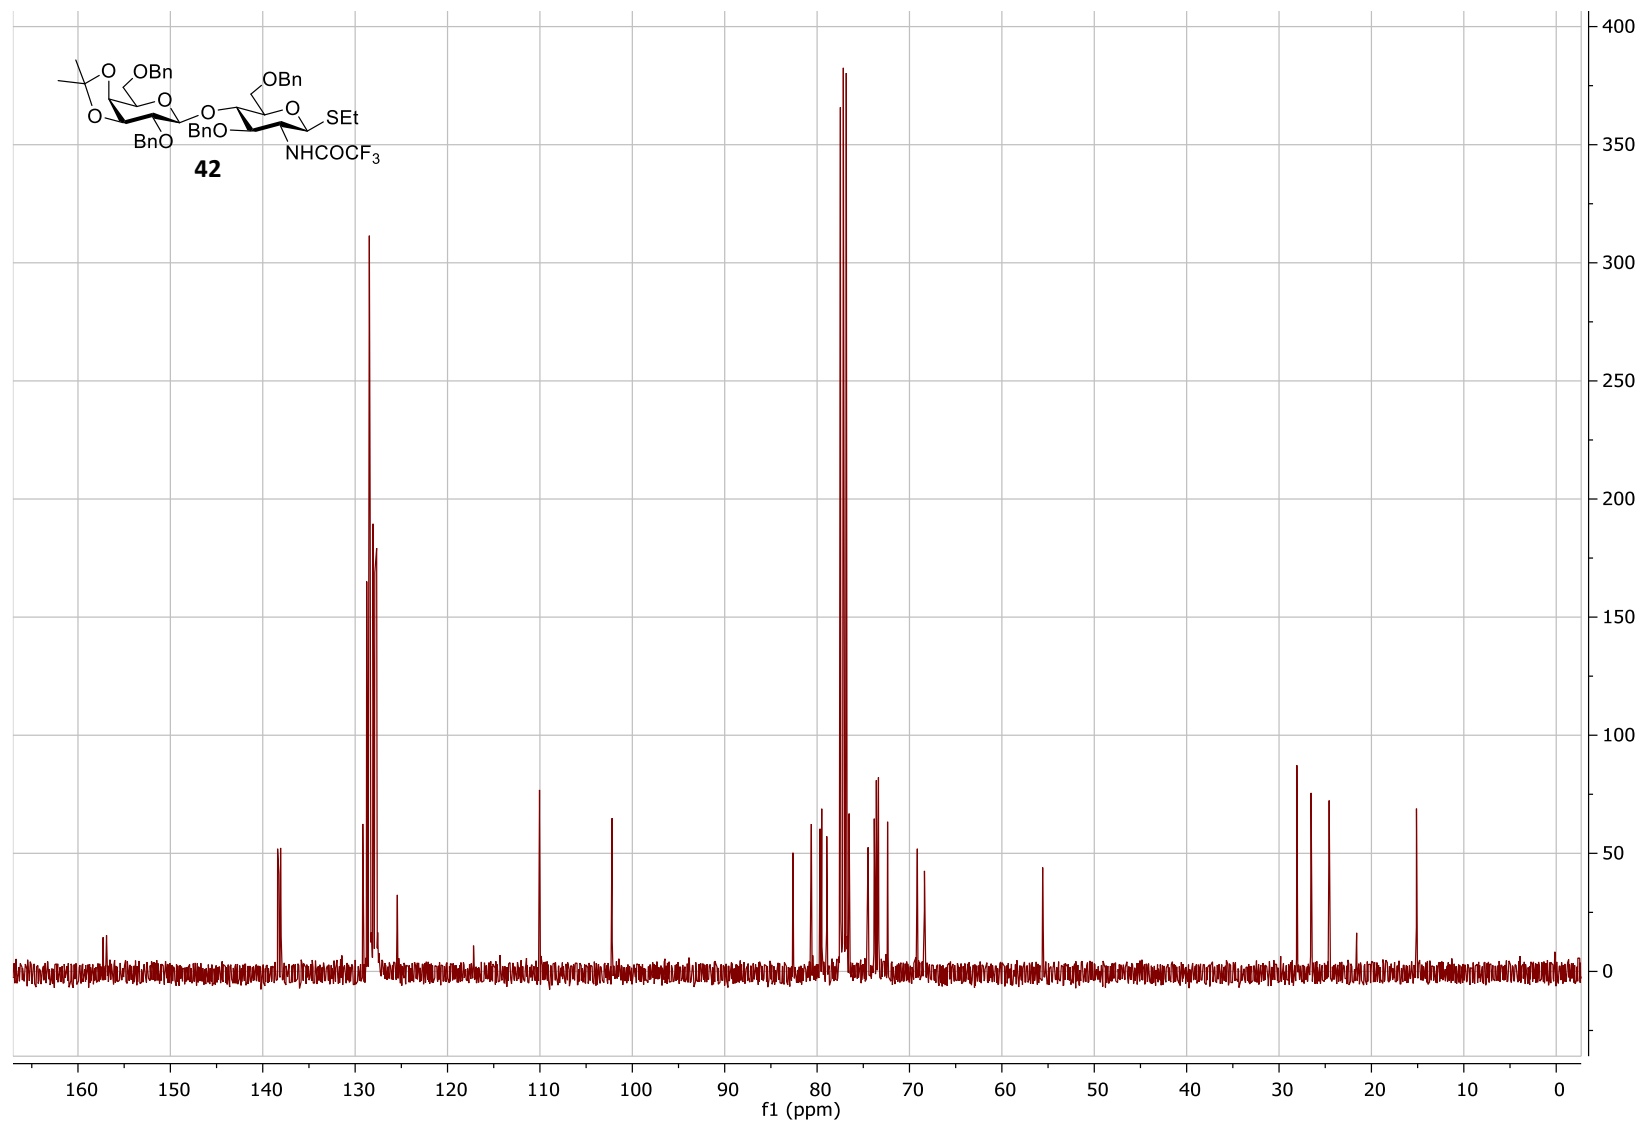

Compound **43**:  
<sup>1</sup>H NMR

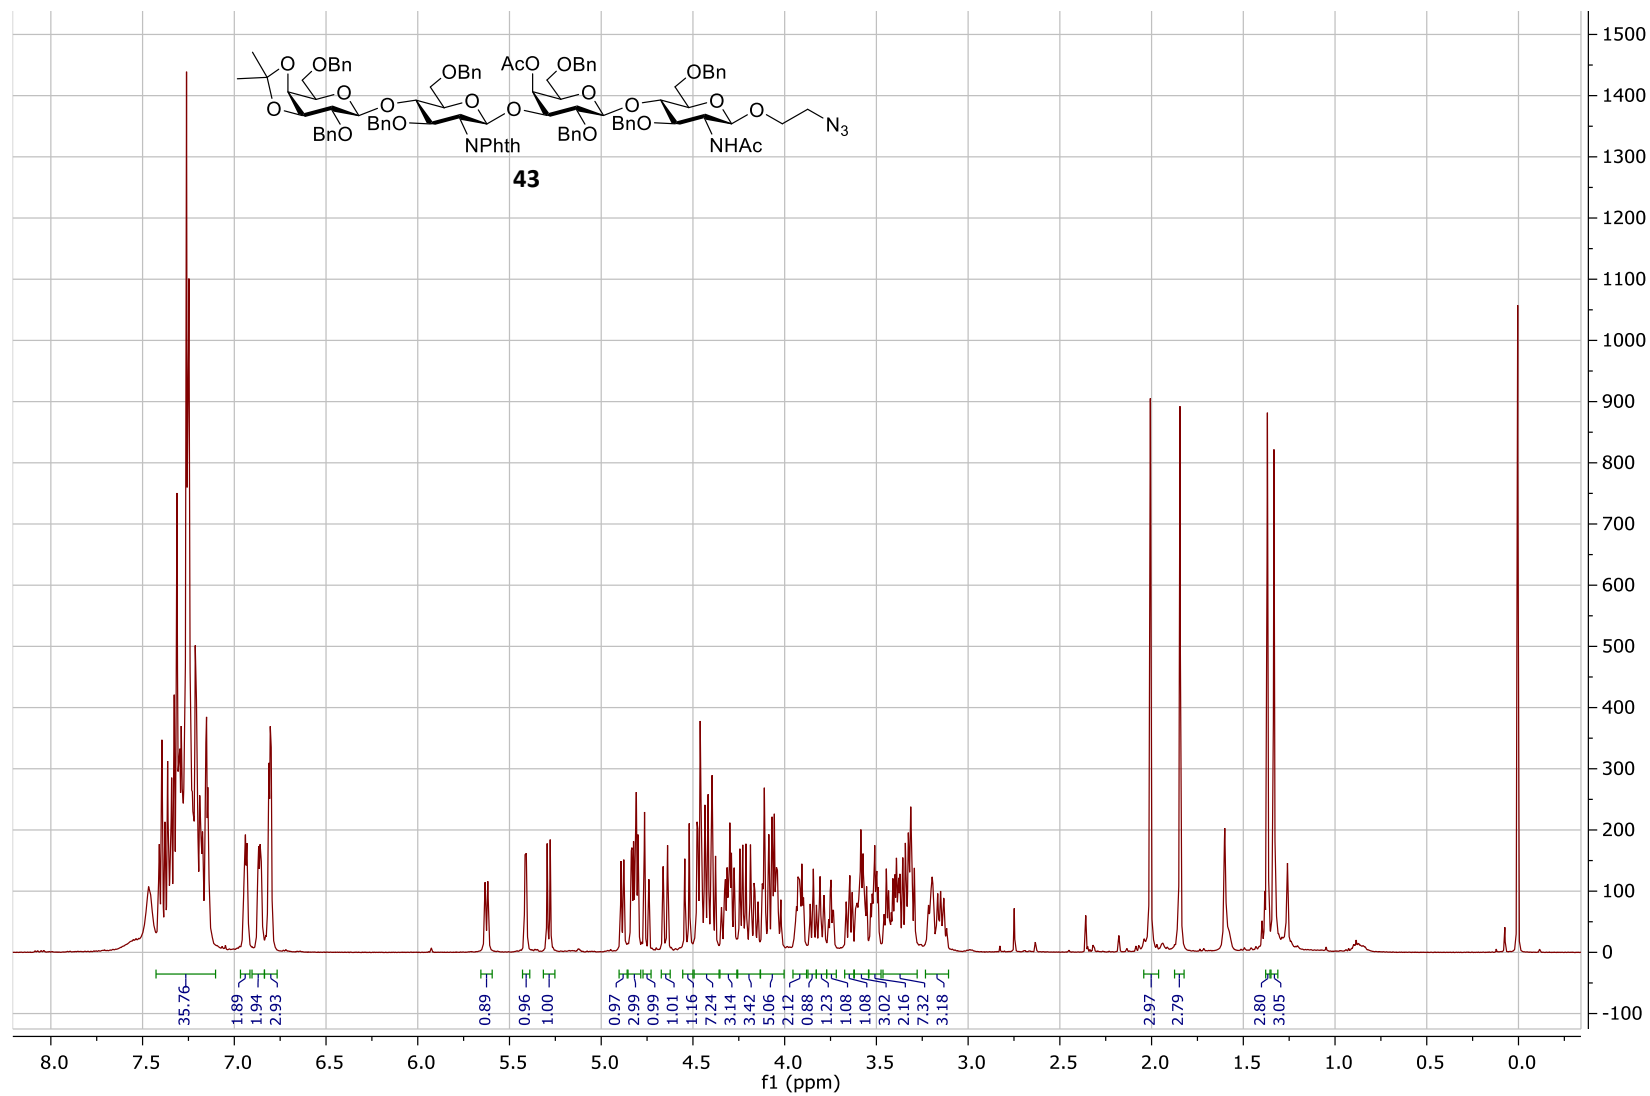





Compound 44:  
<sup>1</sup>H NMR

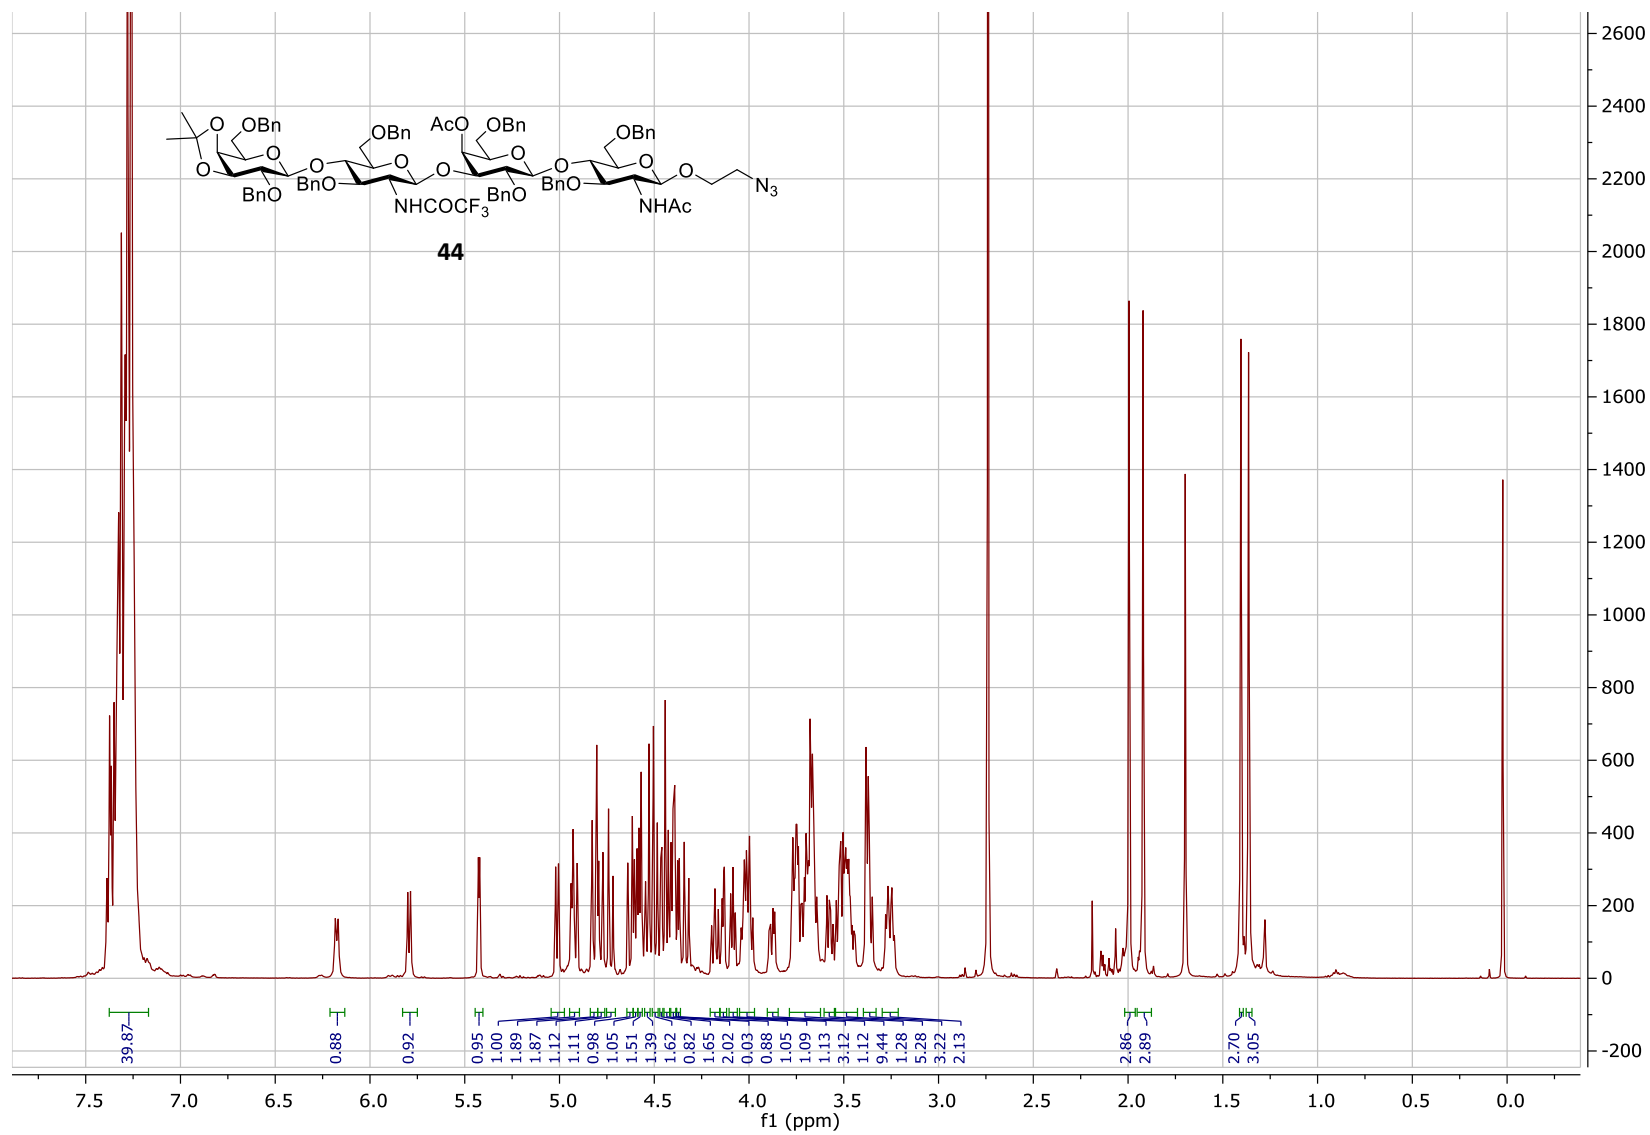

Compound **44**:  
<sup>13</sup>C NMR

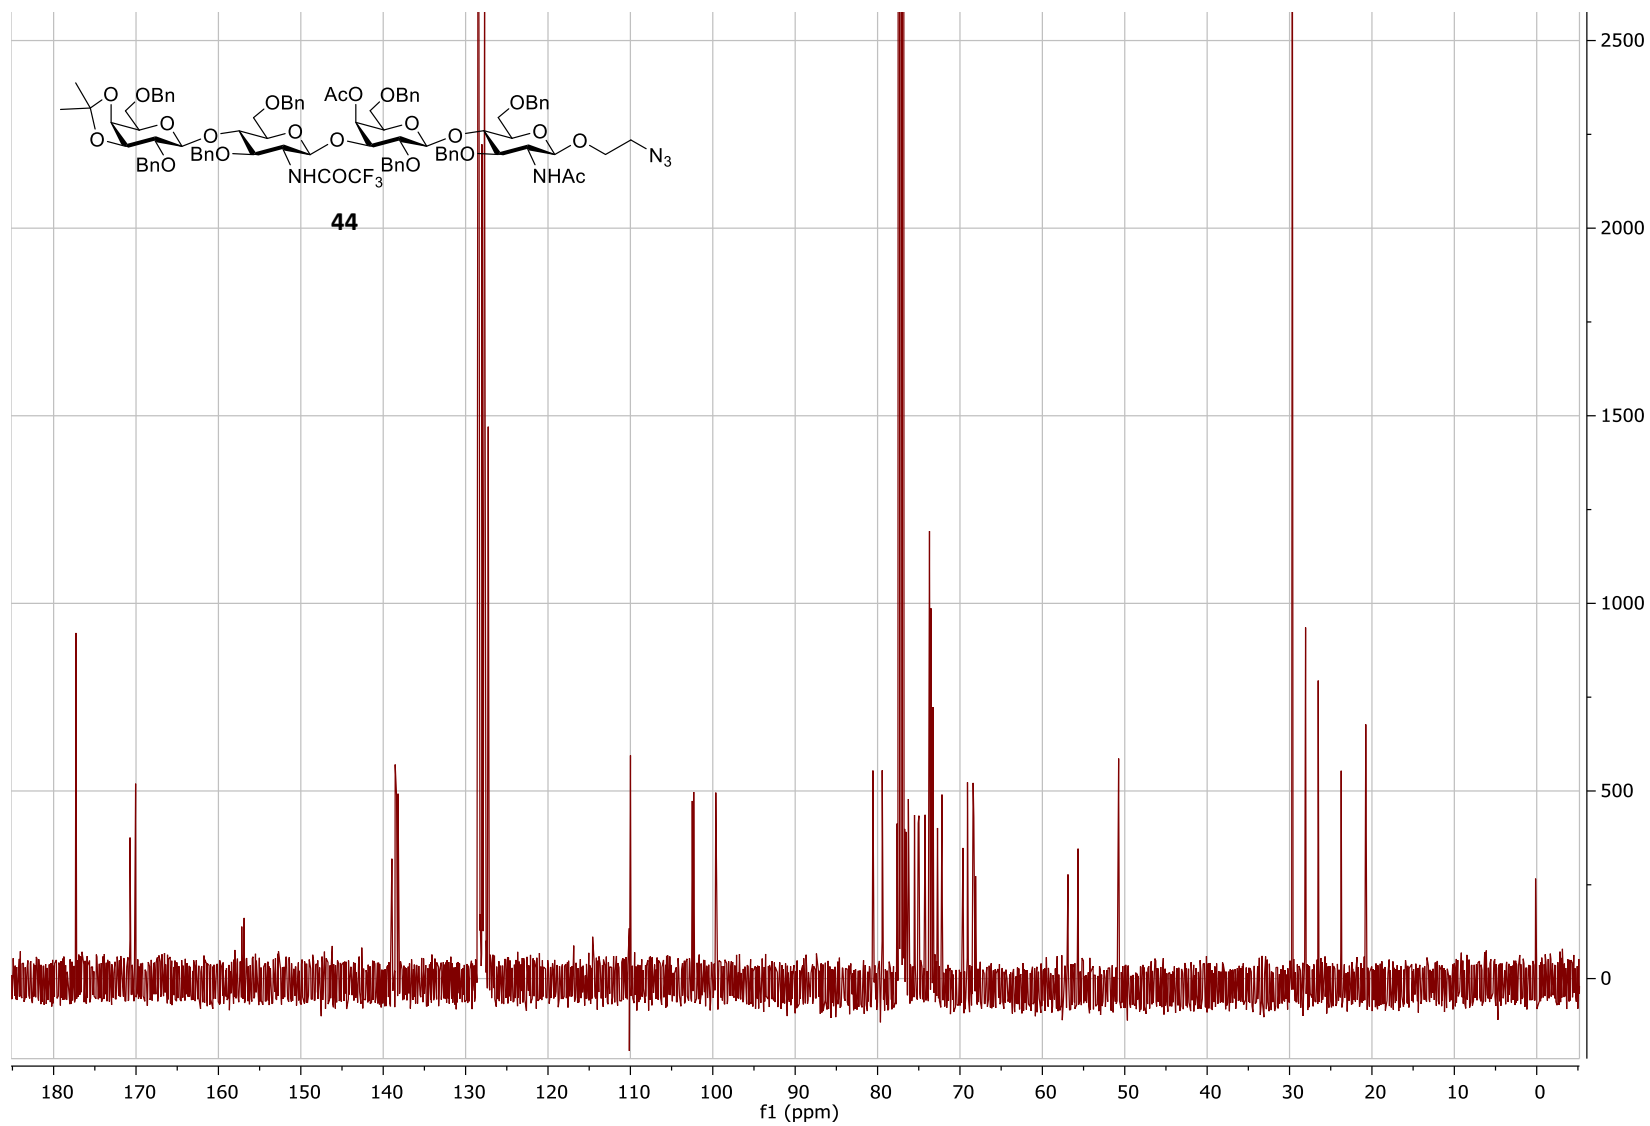

Compound **45**:  
<sup>1</sup>H NMR

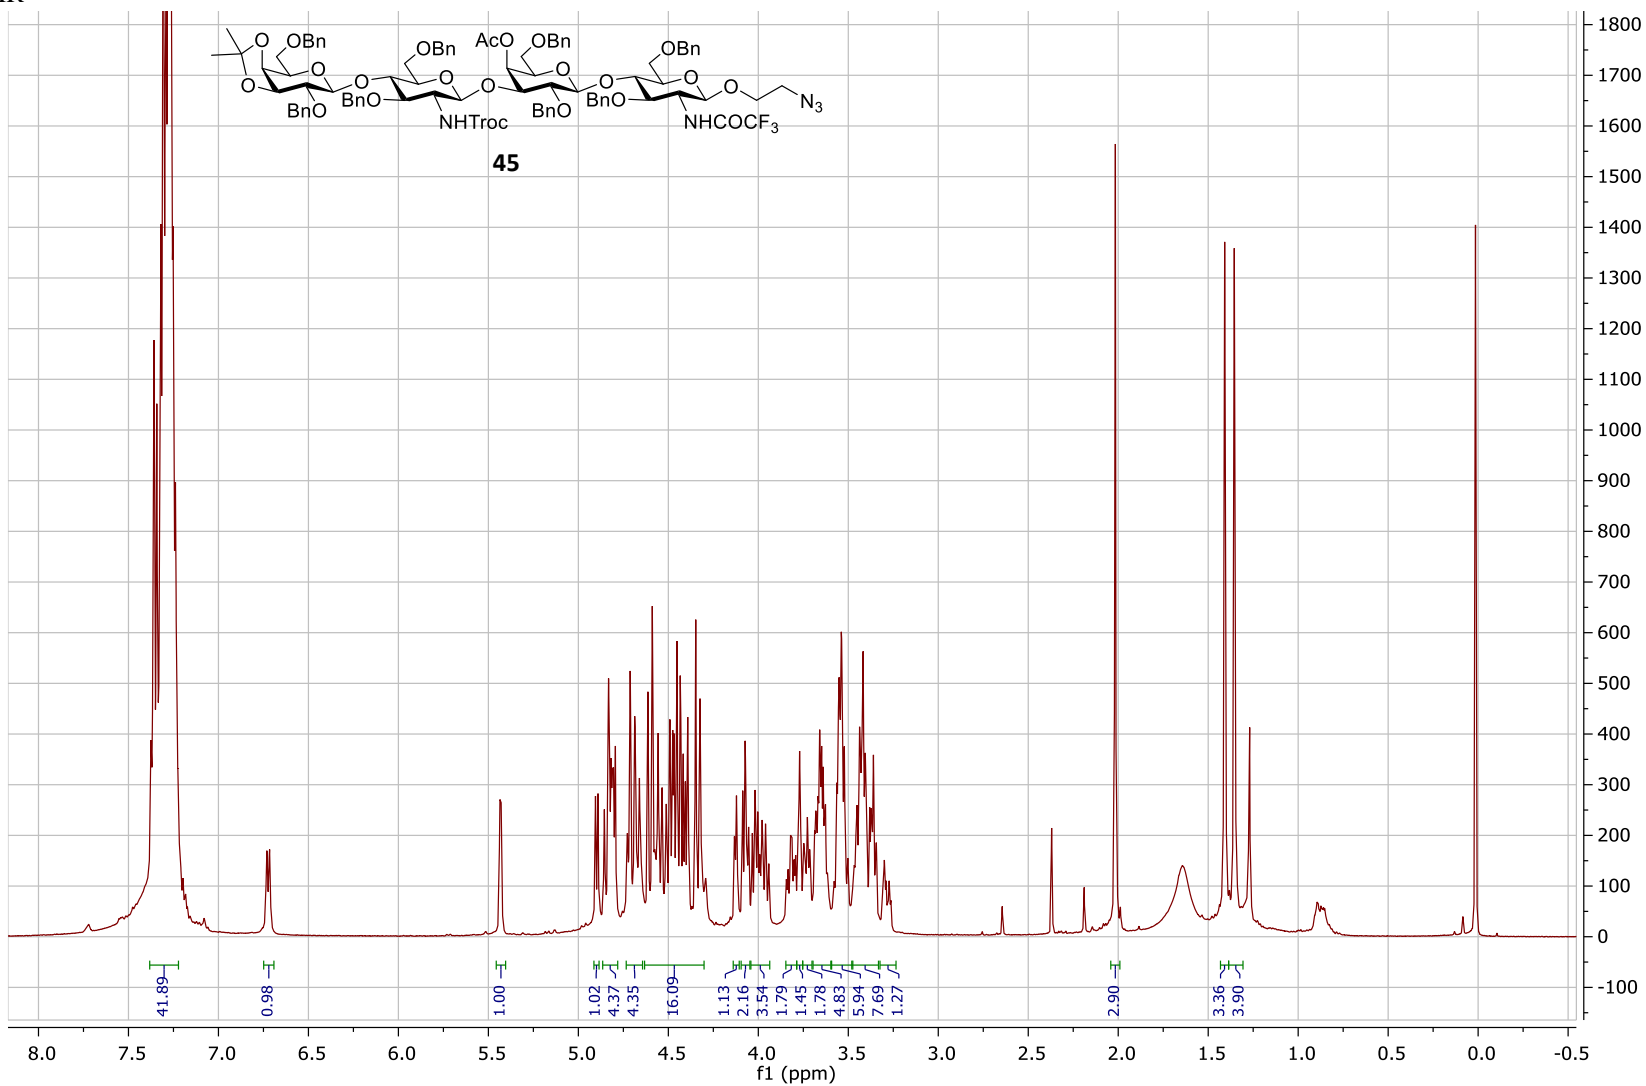

Compound **45**:  
<sup>13</sup>C NMR

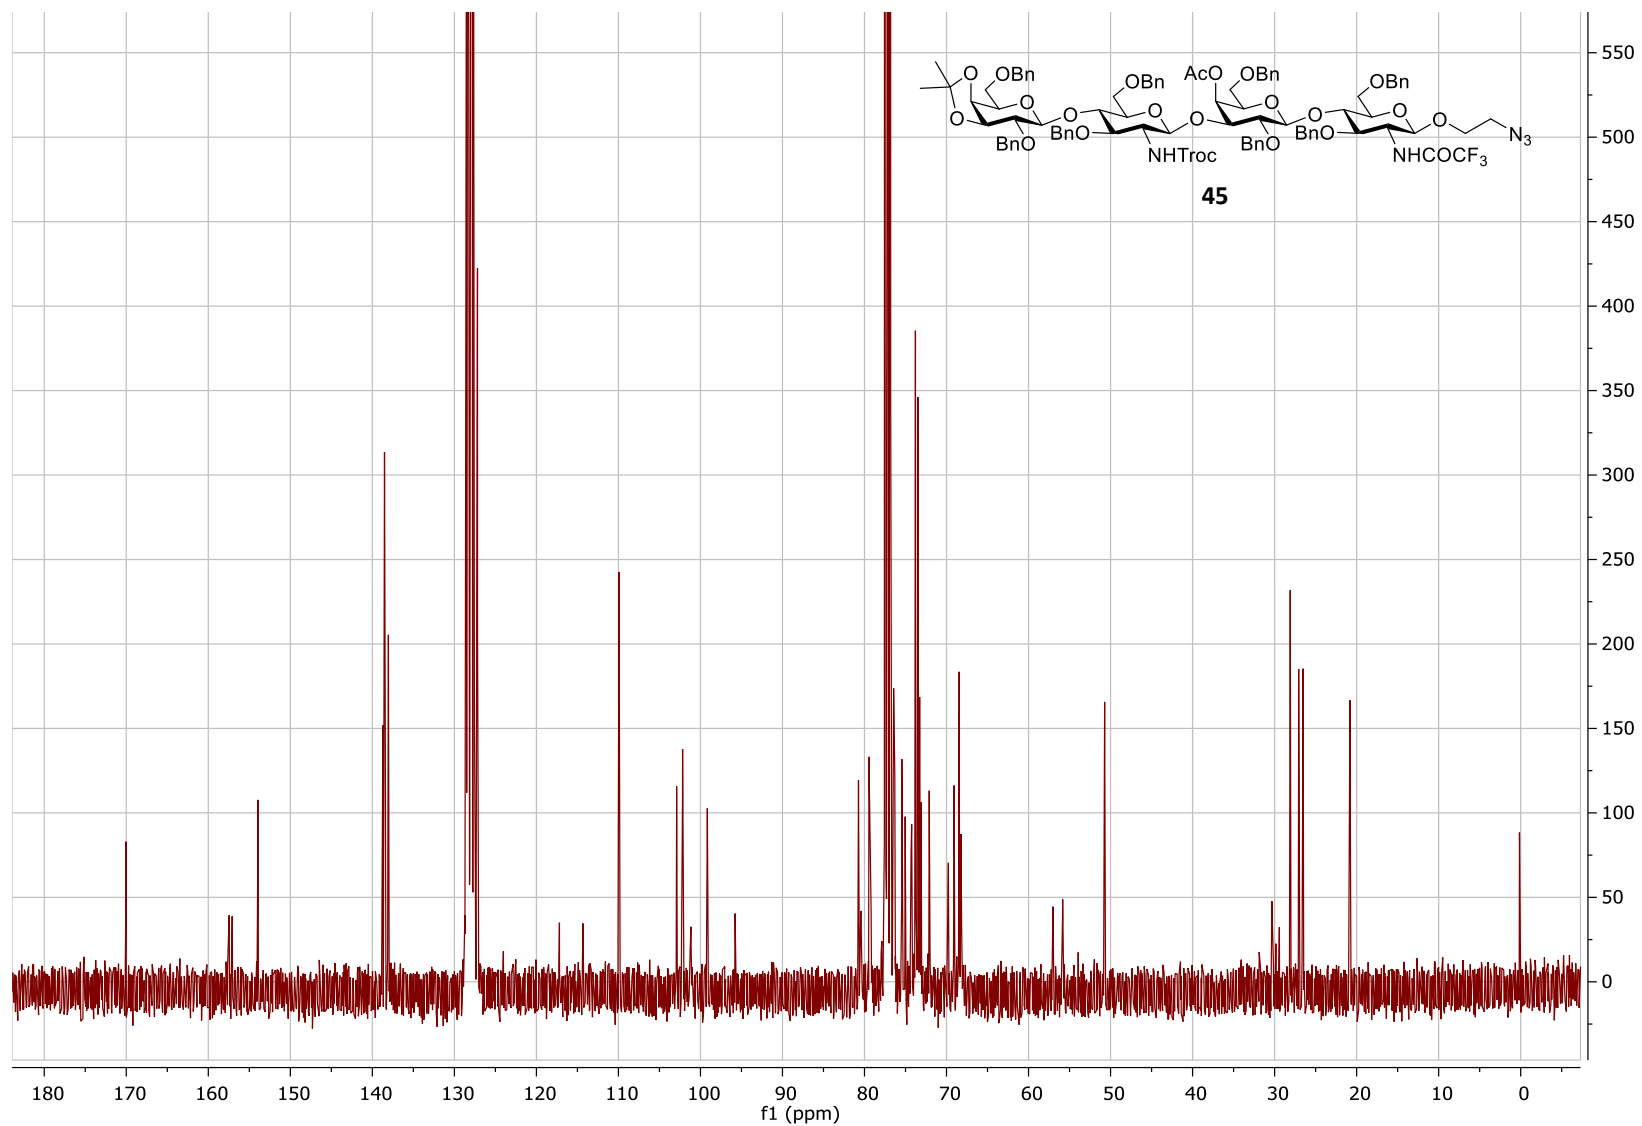

Compound **50**:  
<sup>1</sup>H NMR

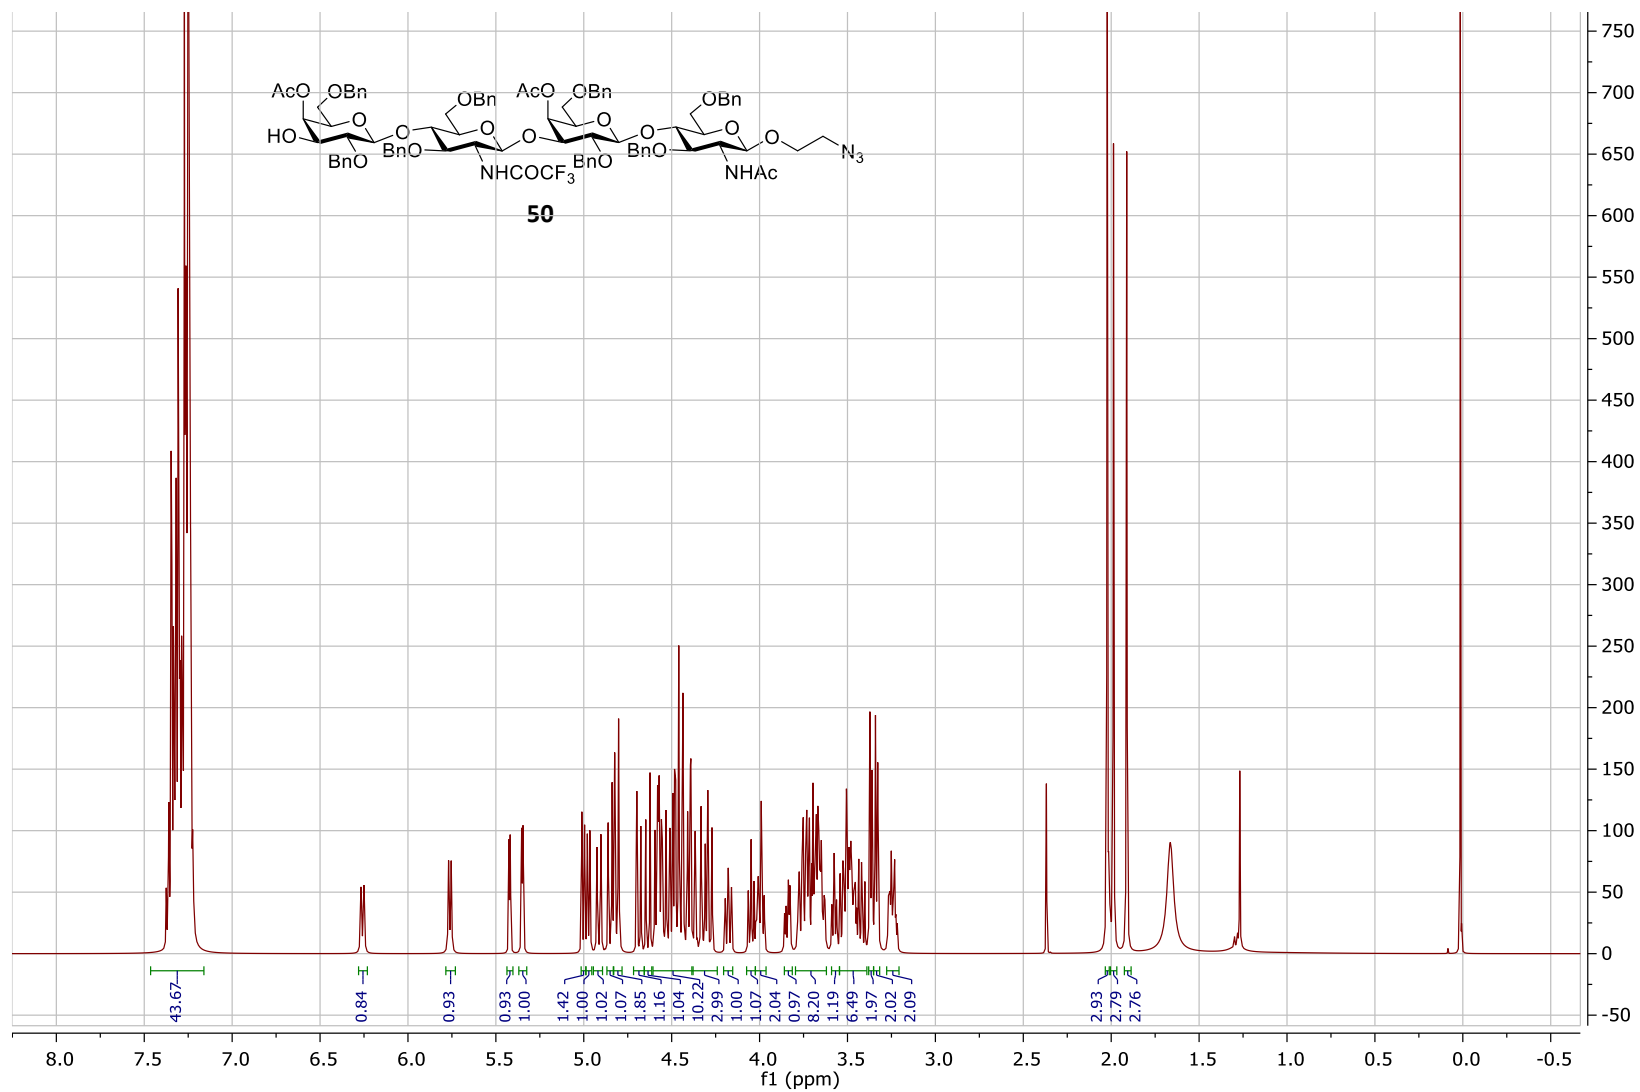

Compound **50**:  
<sup>13</sup>C NMR

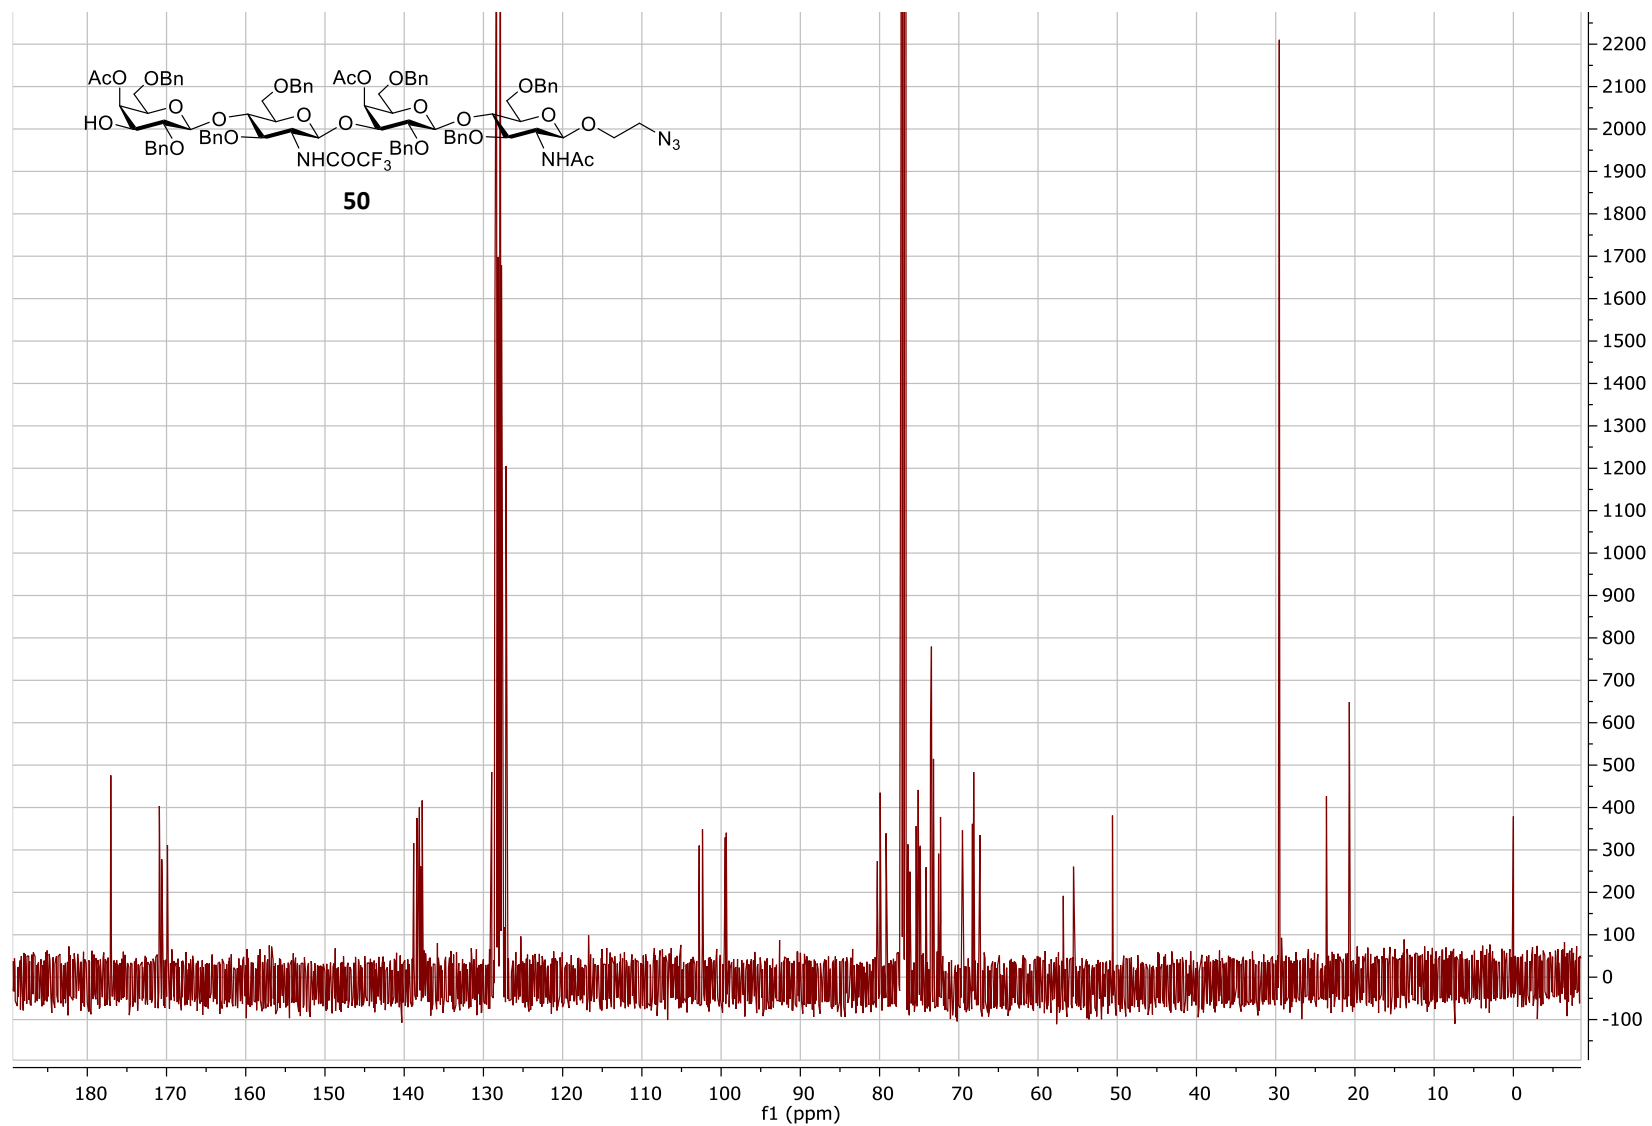

Compound 51:  
<sup>1</sup>H NMR

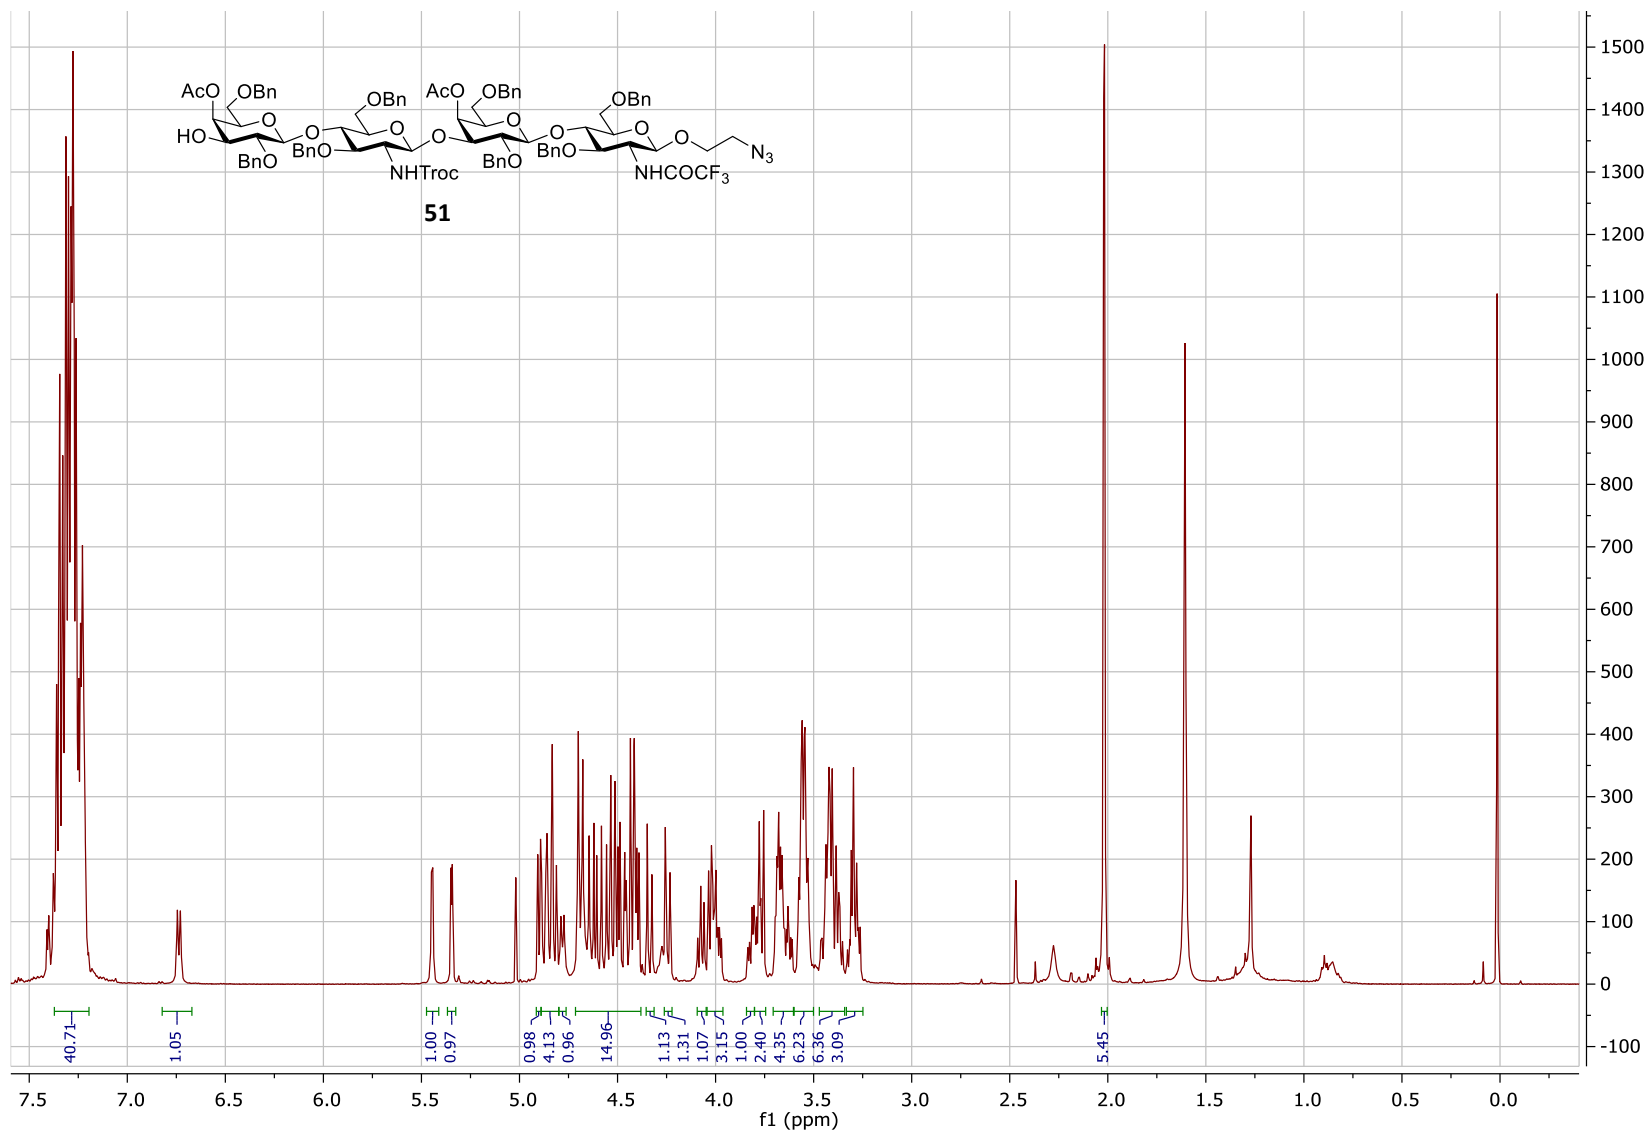

Compound **51**:  
<sup>13</sup>C NMR

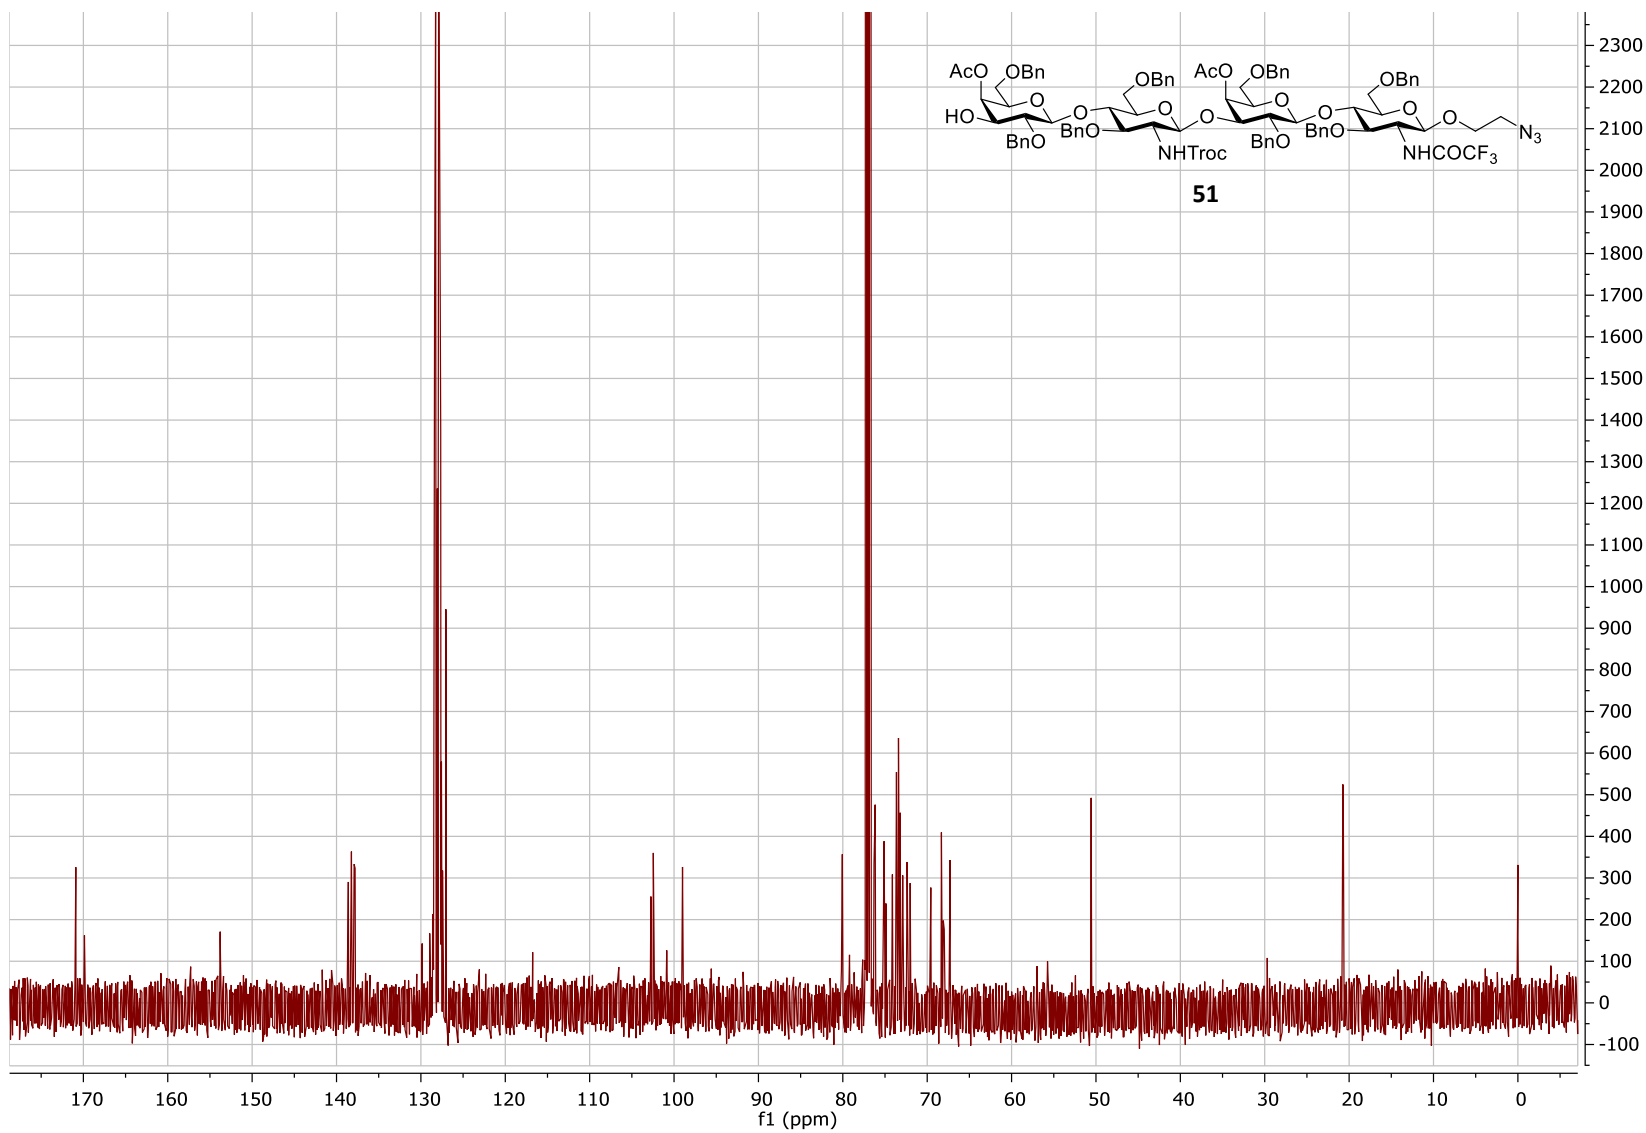



Compound **52**:  
<sup>1</sup>H NMR

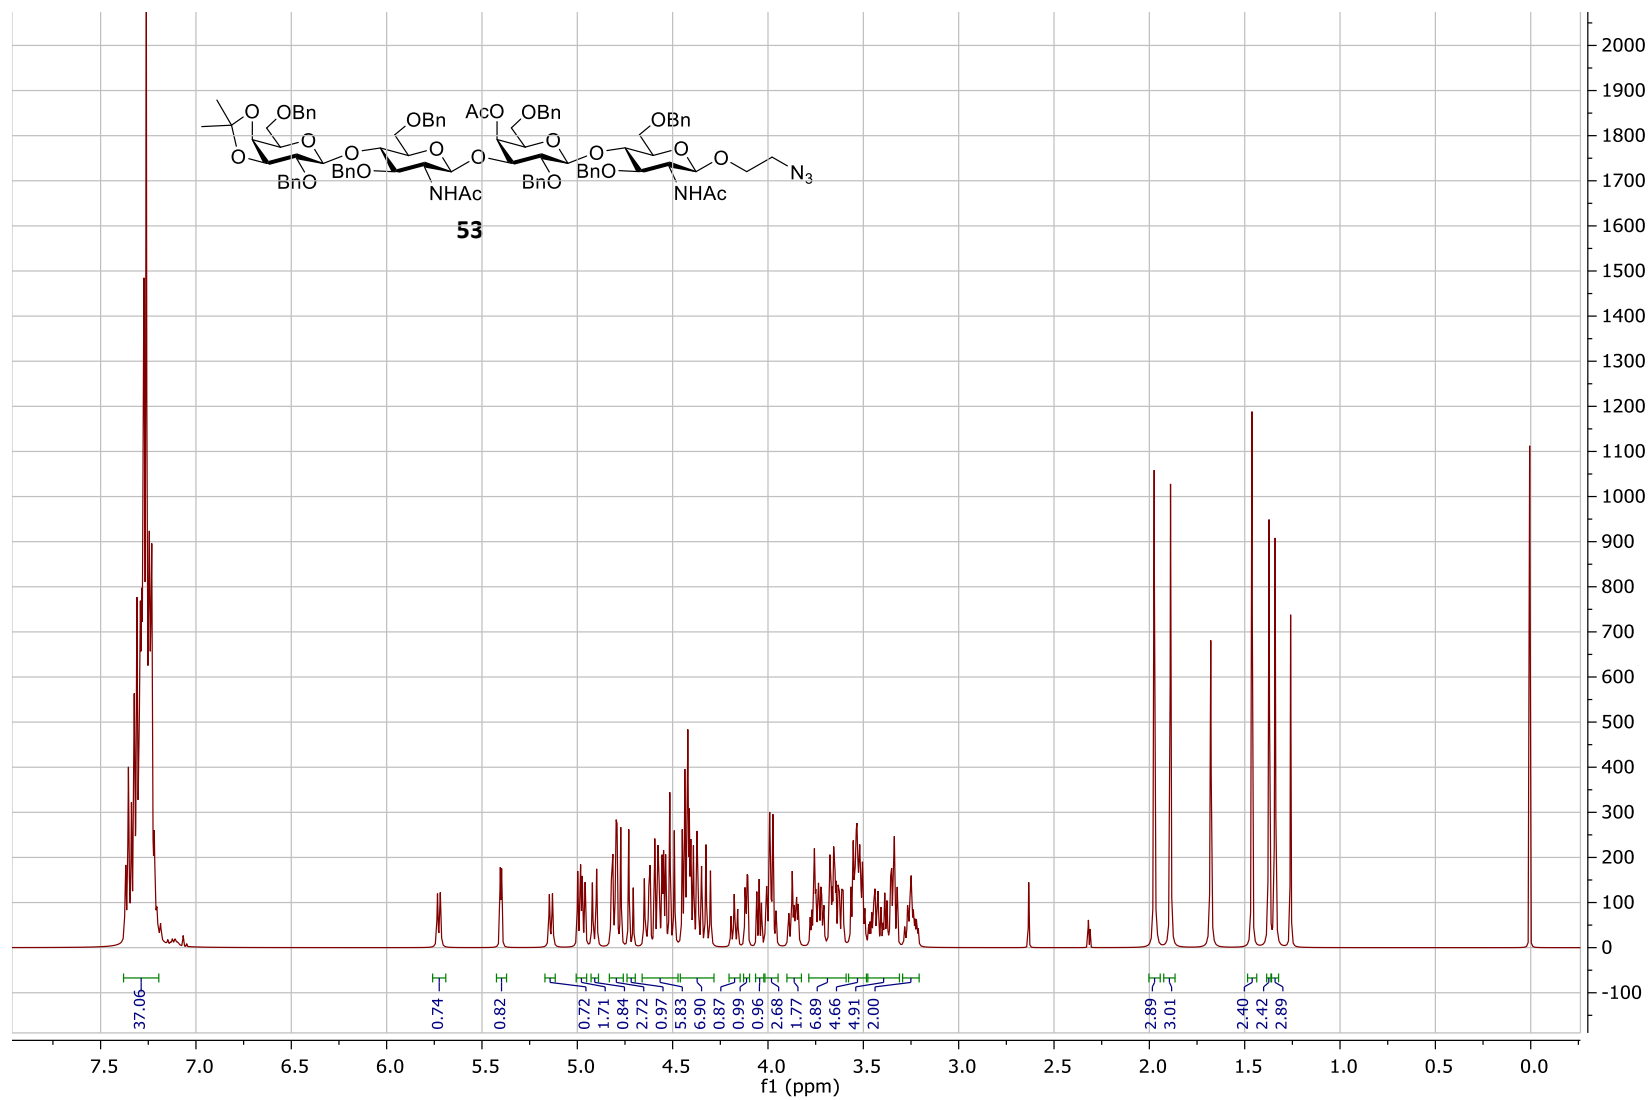

Compound **52**:  
<sup>13</sup>C NMR

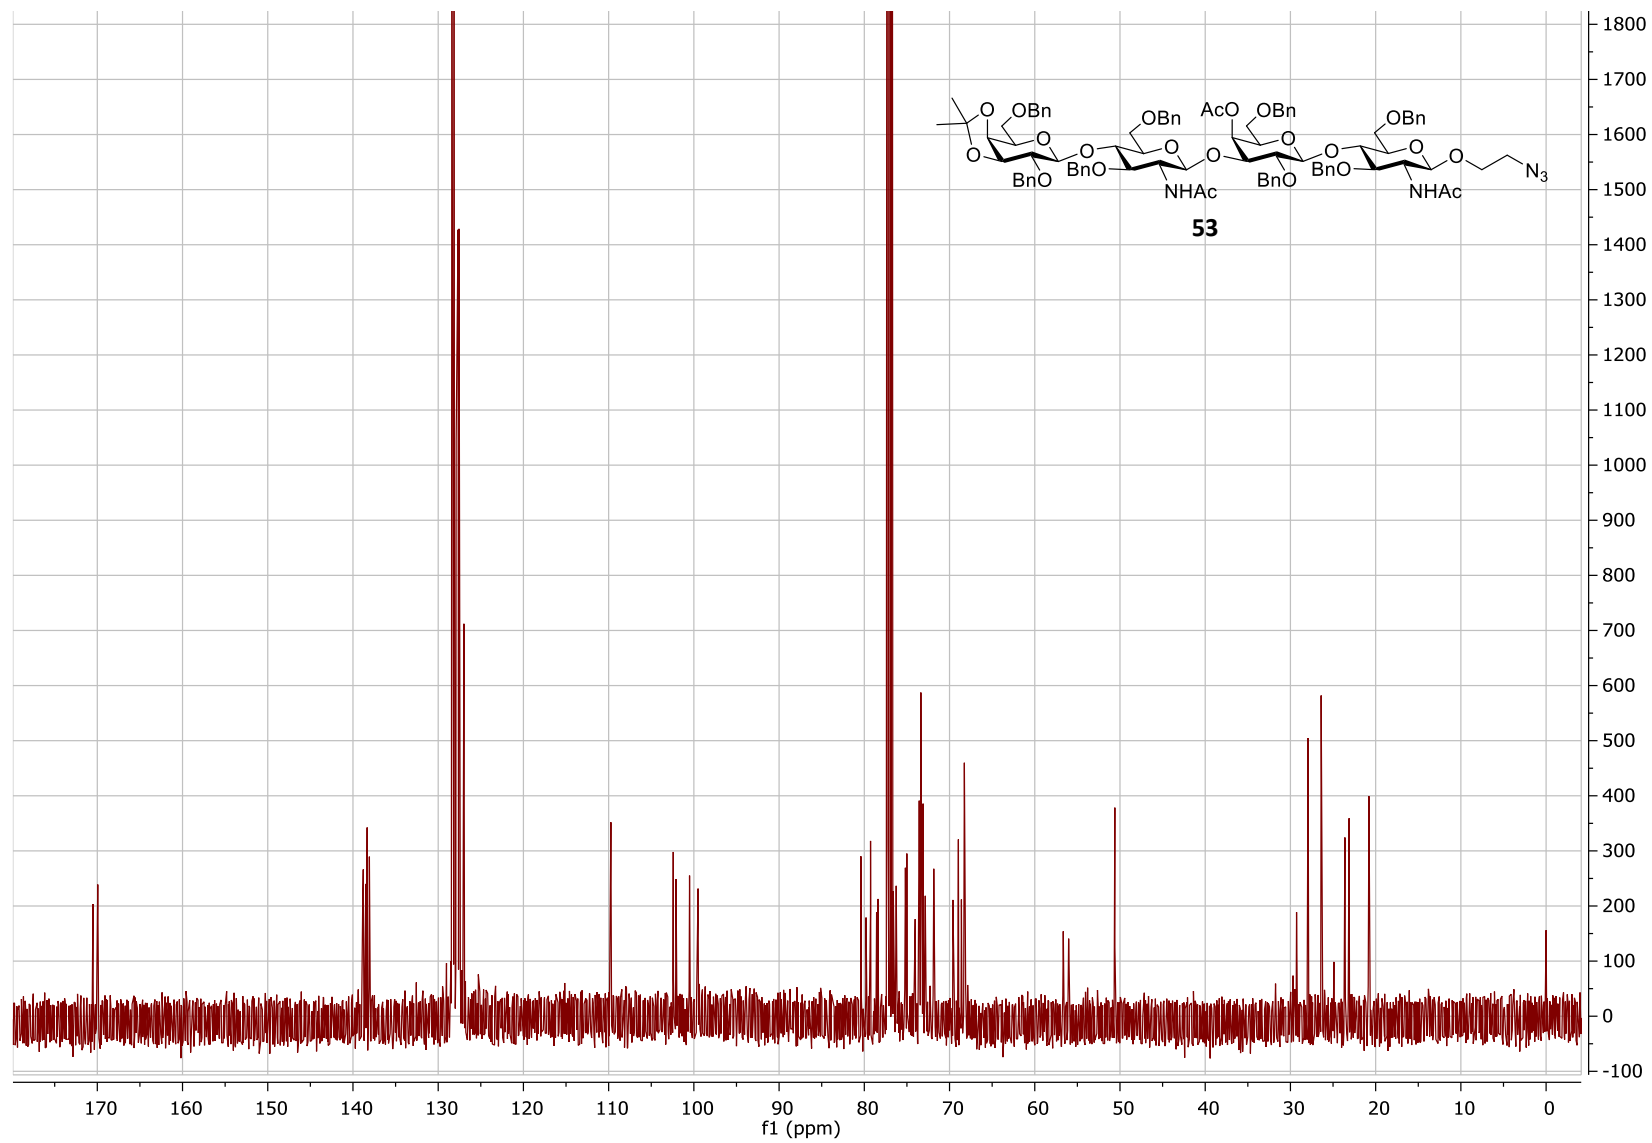

Compound **55**:  
<sup>1</sup>H NMR

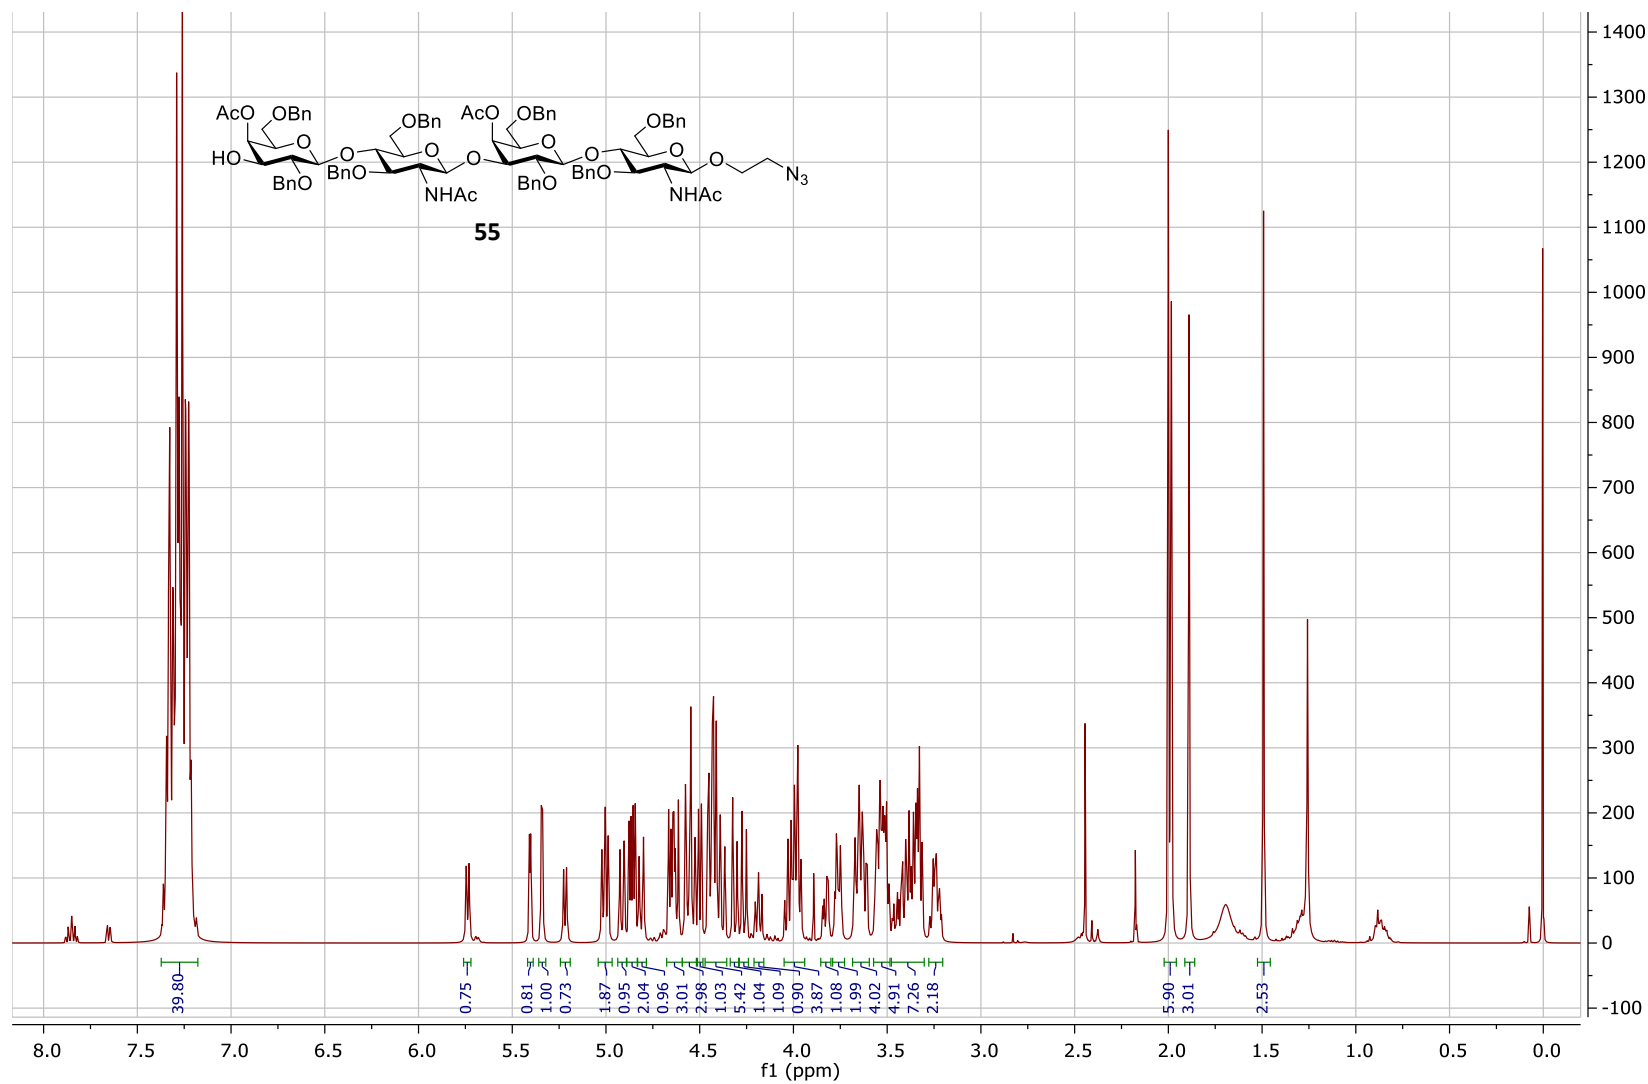

Compound **55**:  
 $^{13}\text{C}$  NMR

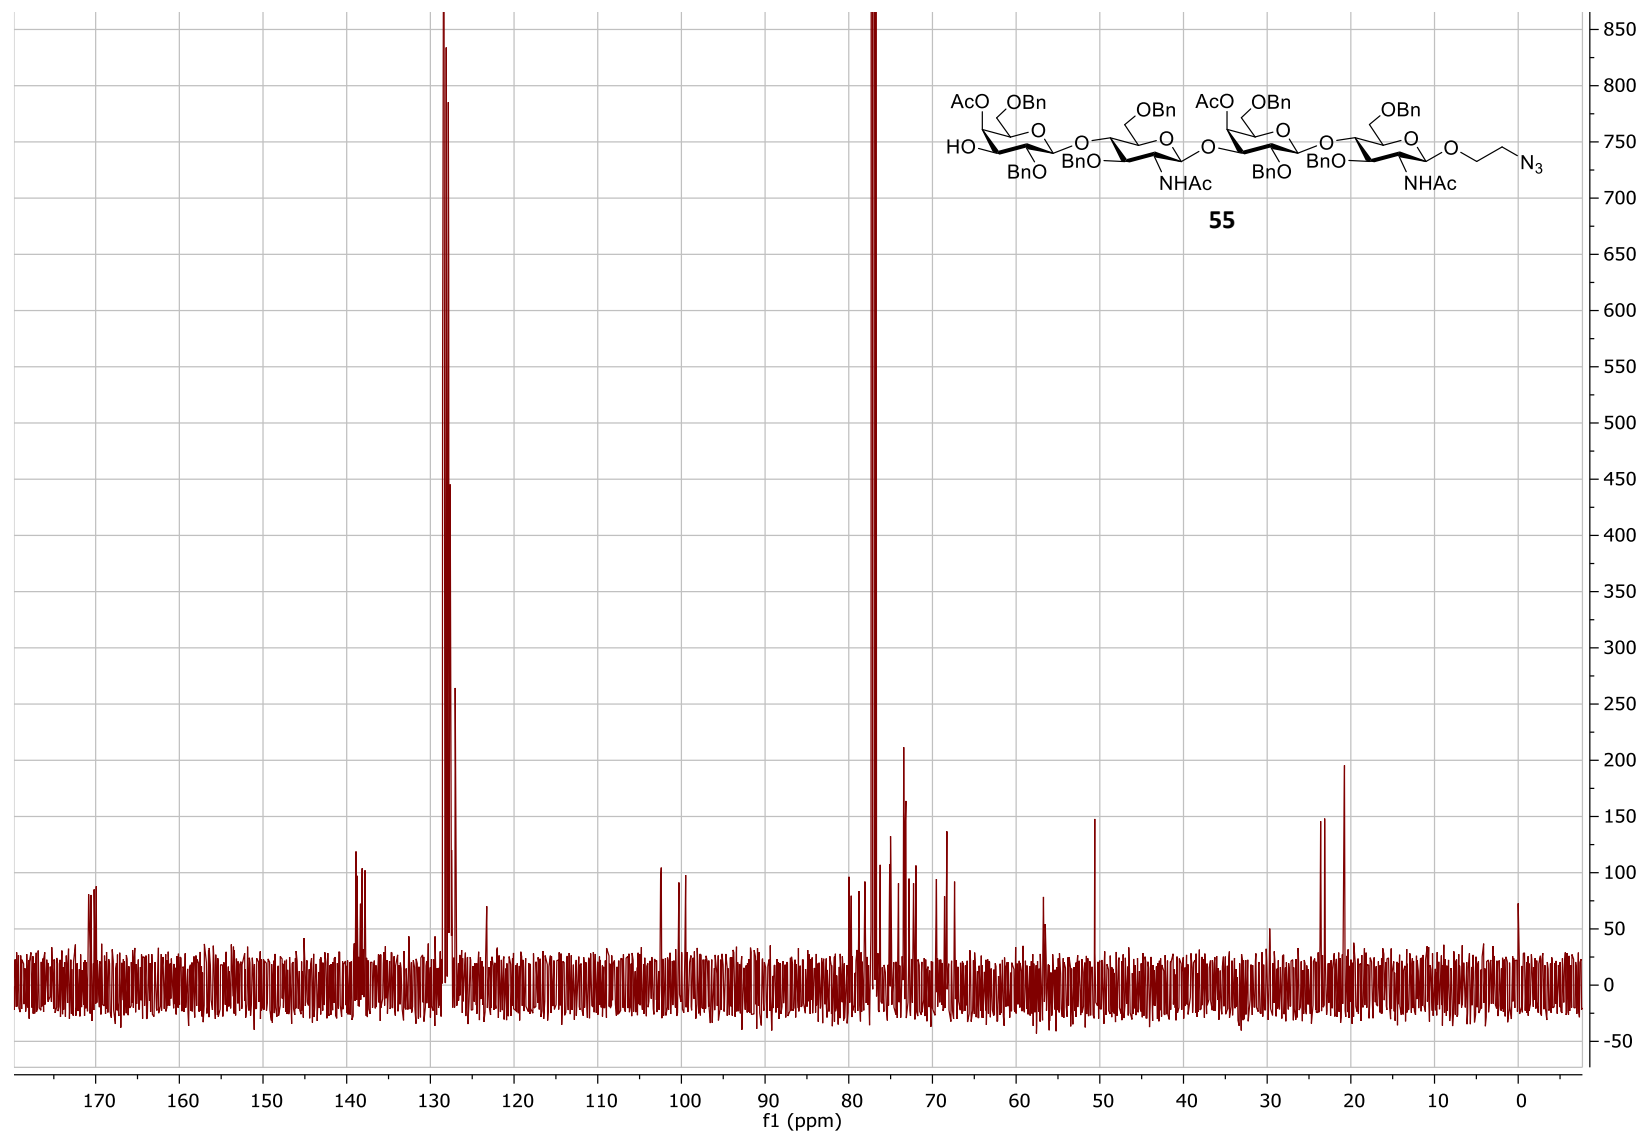

Compound **56**:  
<sup>1</sup>H NMR

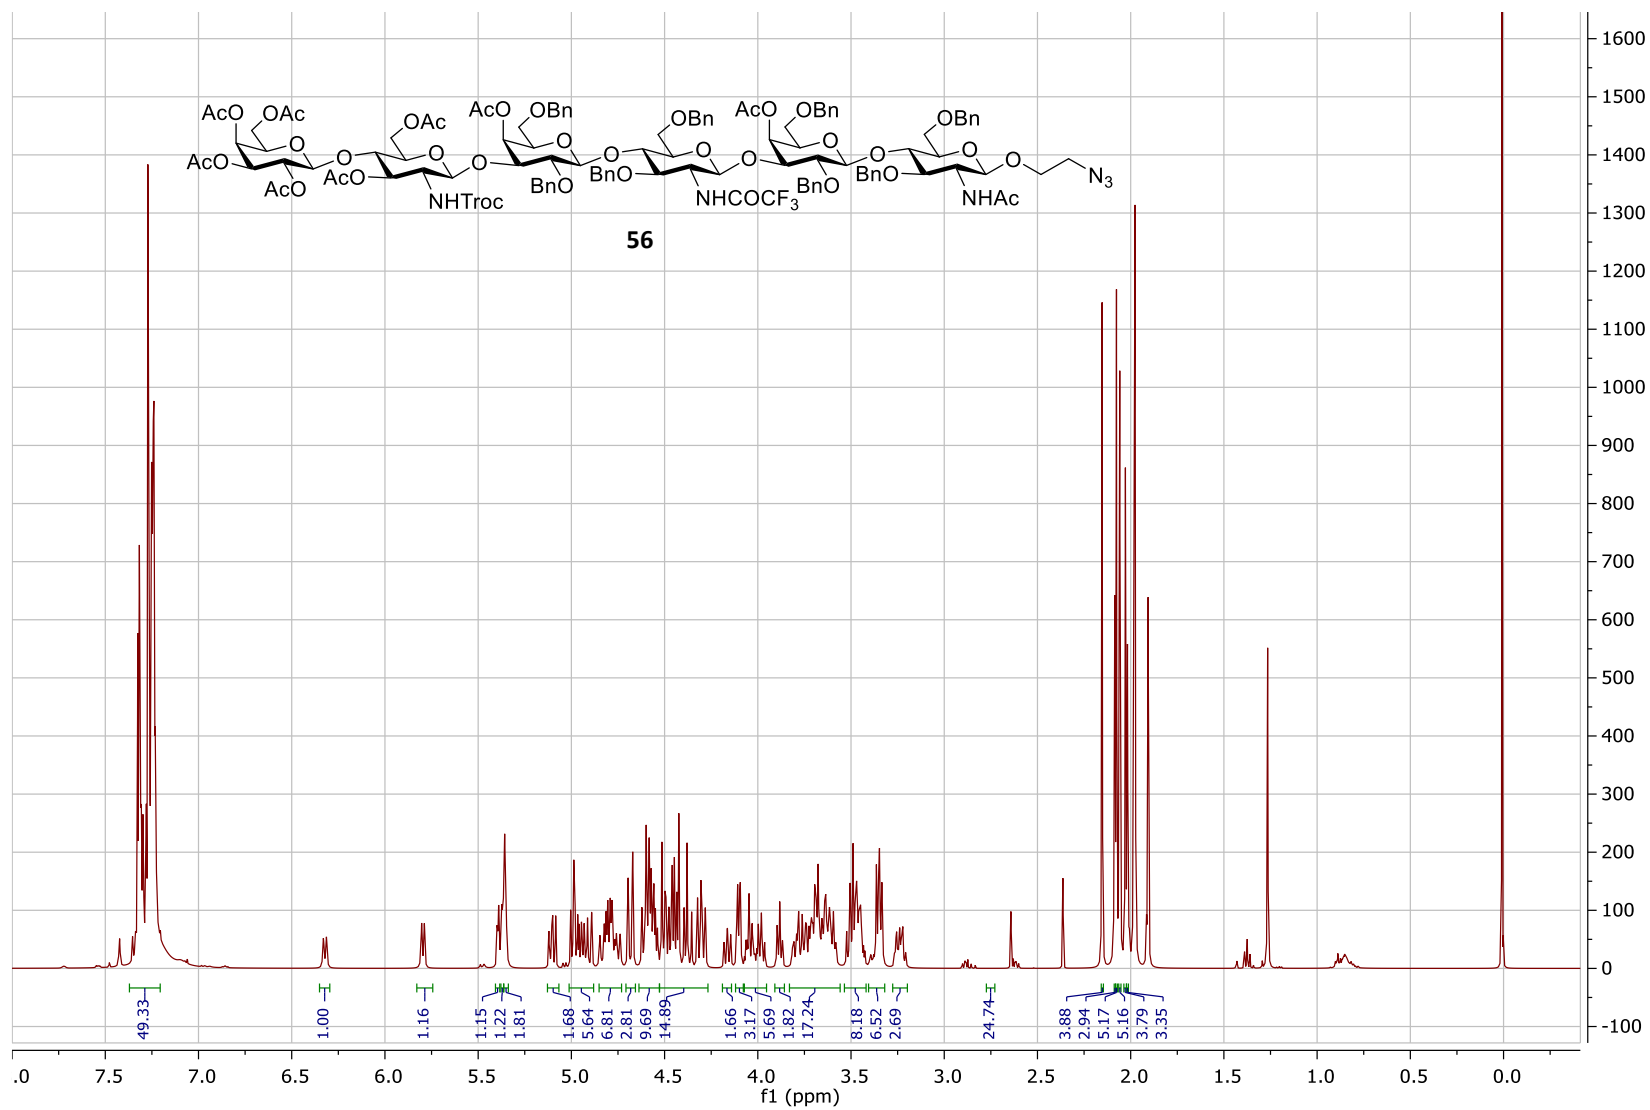

Compound **56**:  
<sup>13</sup>C NMR

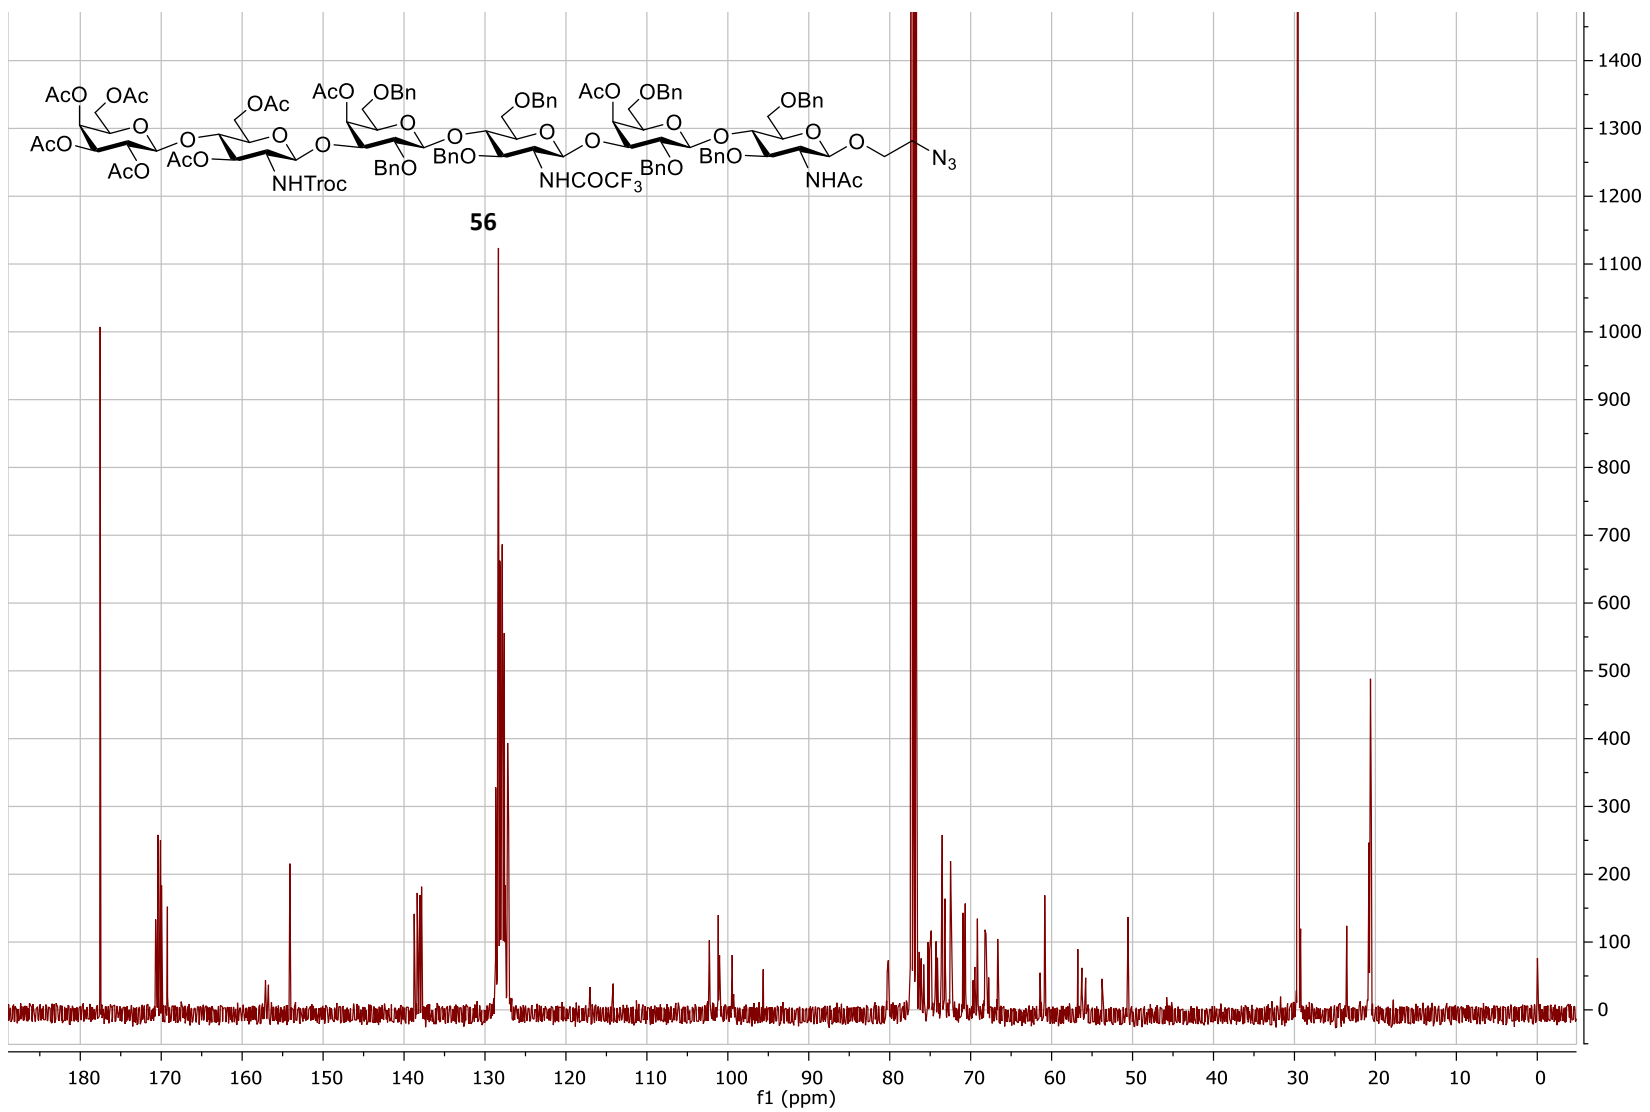

Compound **56**:

$^1\text{H}$ - $^{13}\text{C}$  HSQC (6.4 – 2.6 ppm zoom-in)

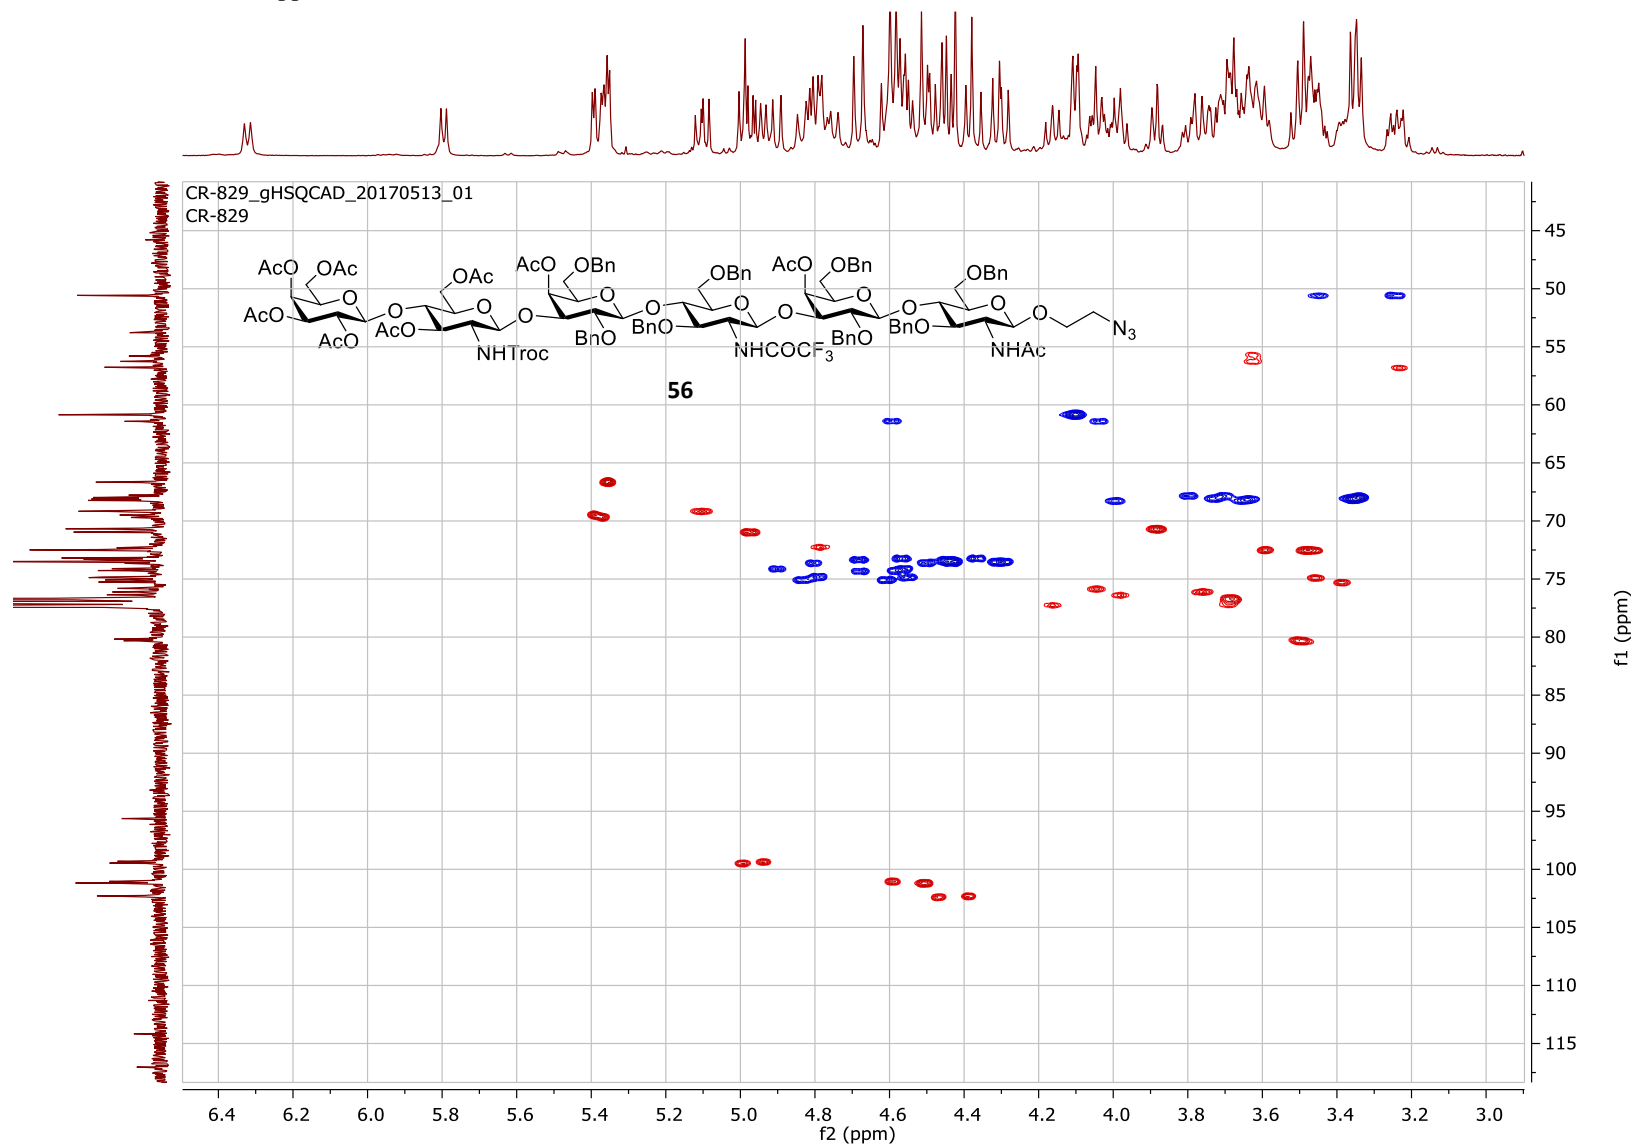

Compound **57**:  
<sup>1</sup>H NMR

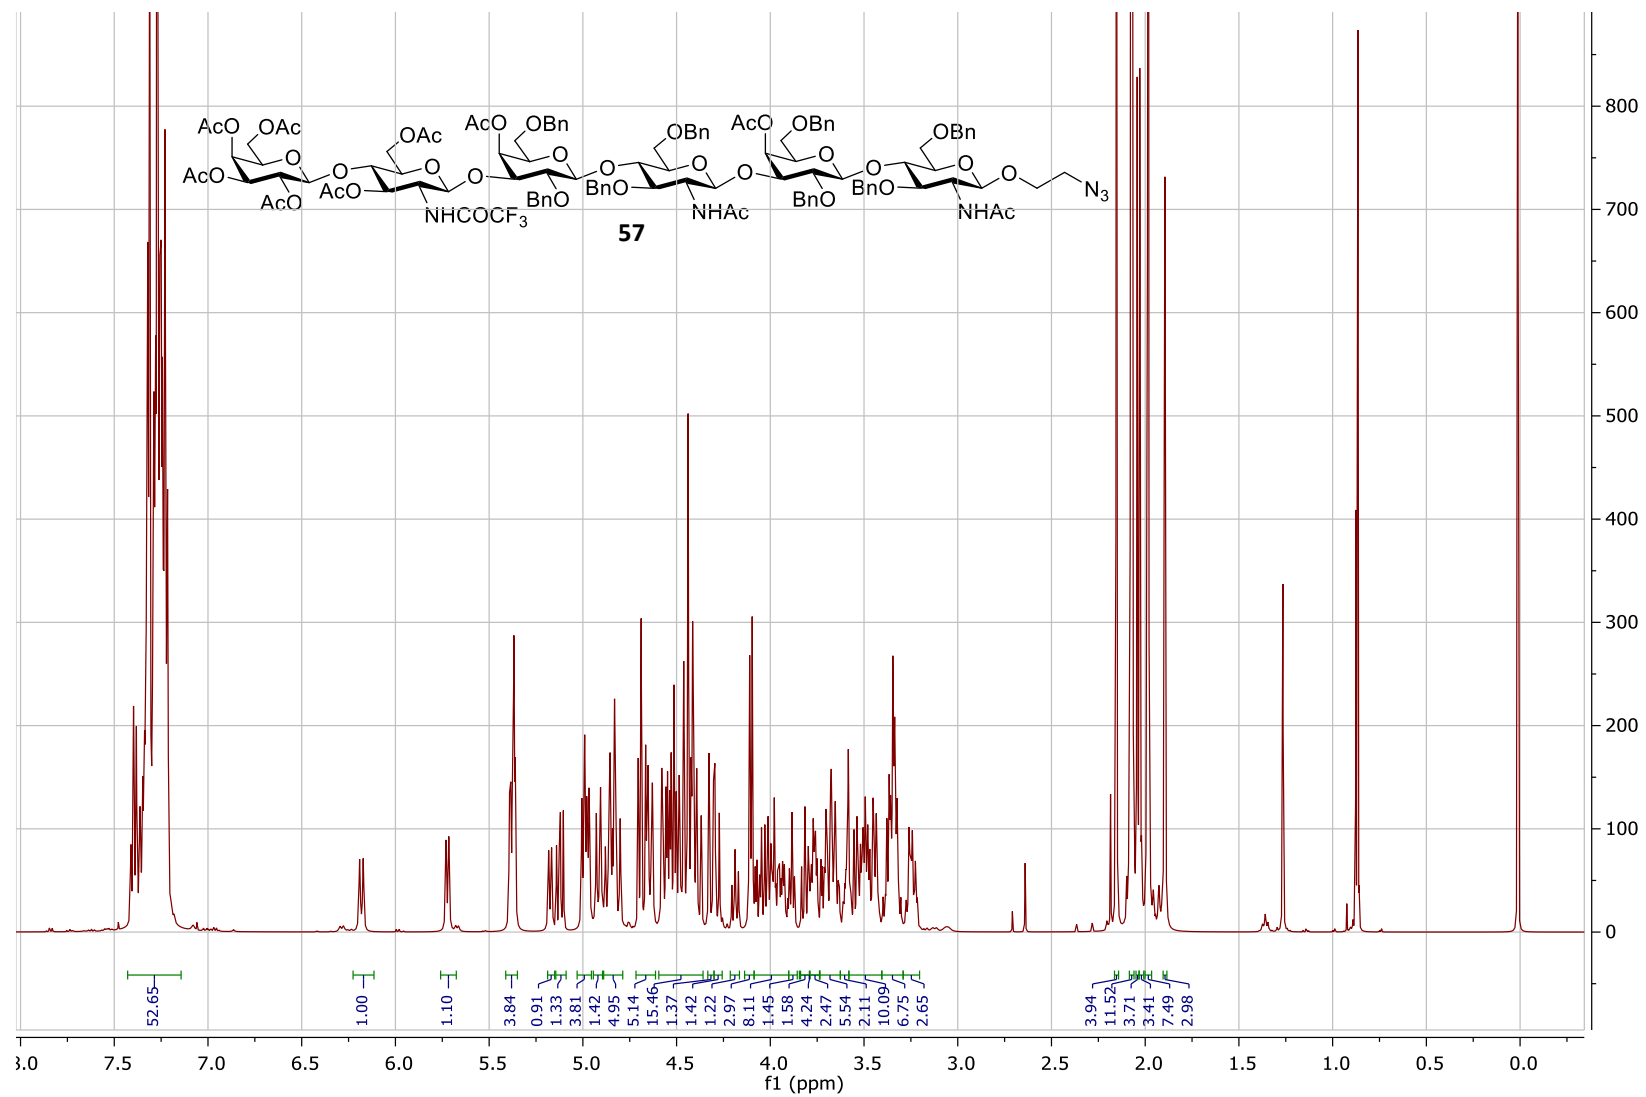



Compound **57**:  
<sup>13</sup>C NMR

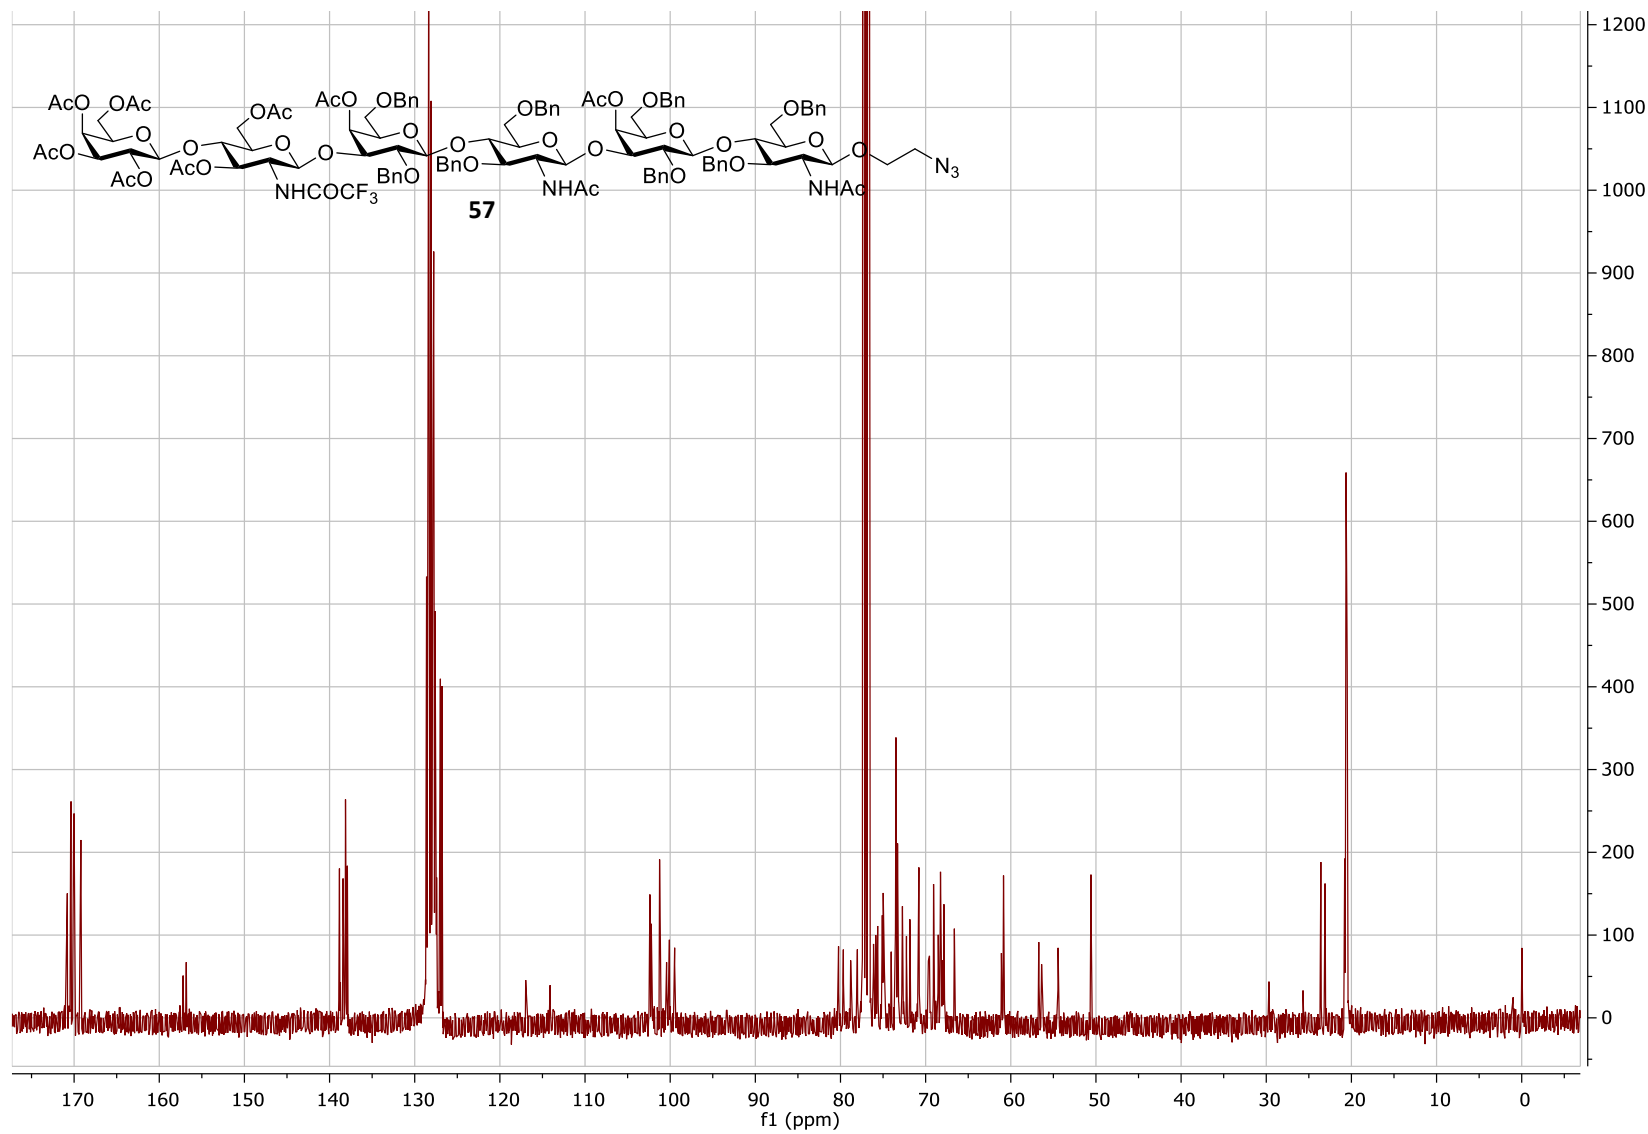

Compound **57**:

$^1\text{H}$ - $^{13}\text{C}$  HSQC (6.4 – 2.6 ppm zoom-in)

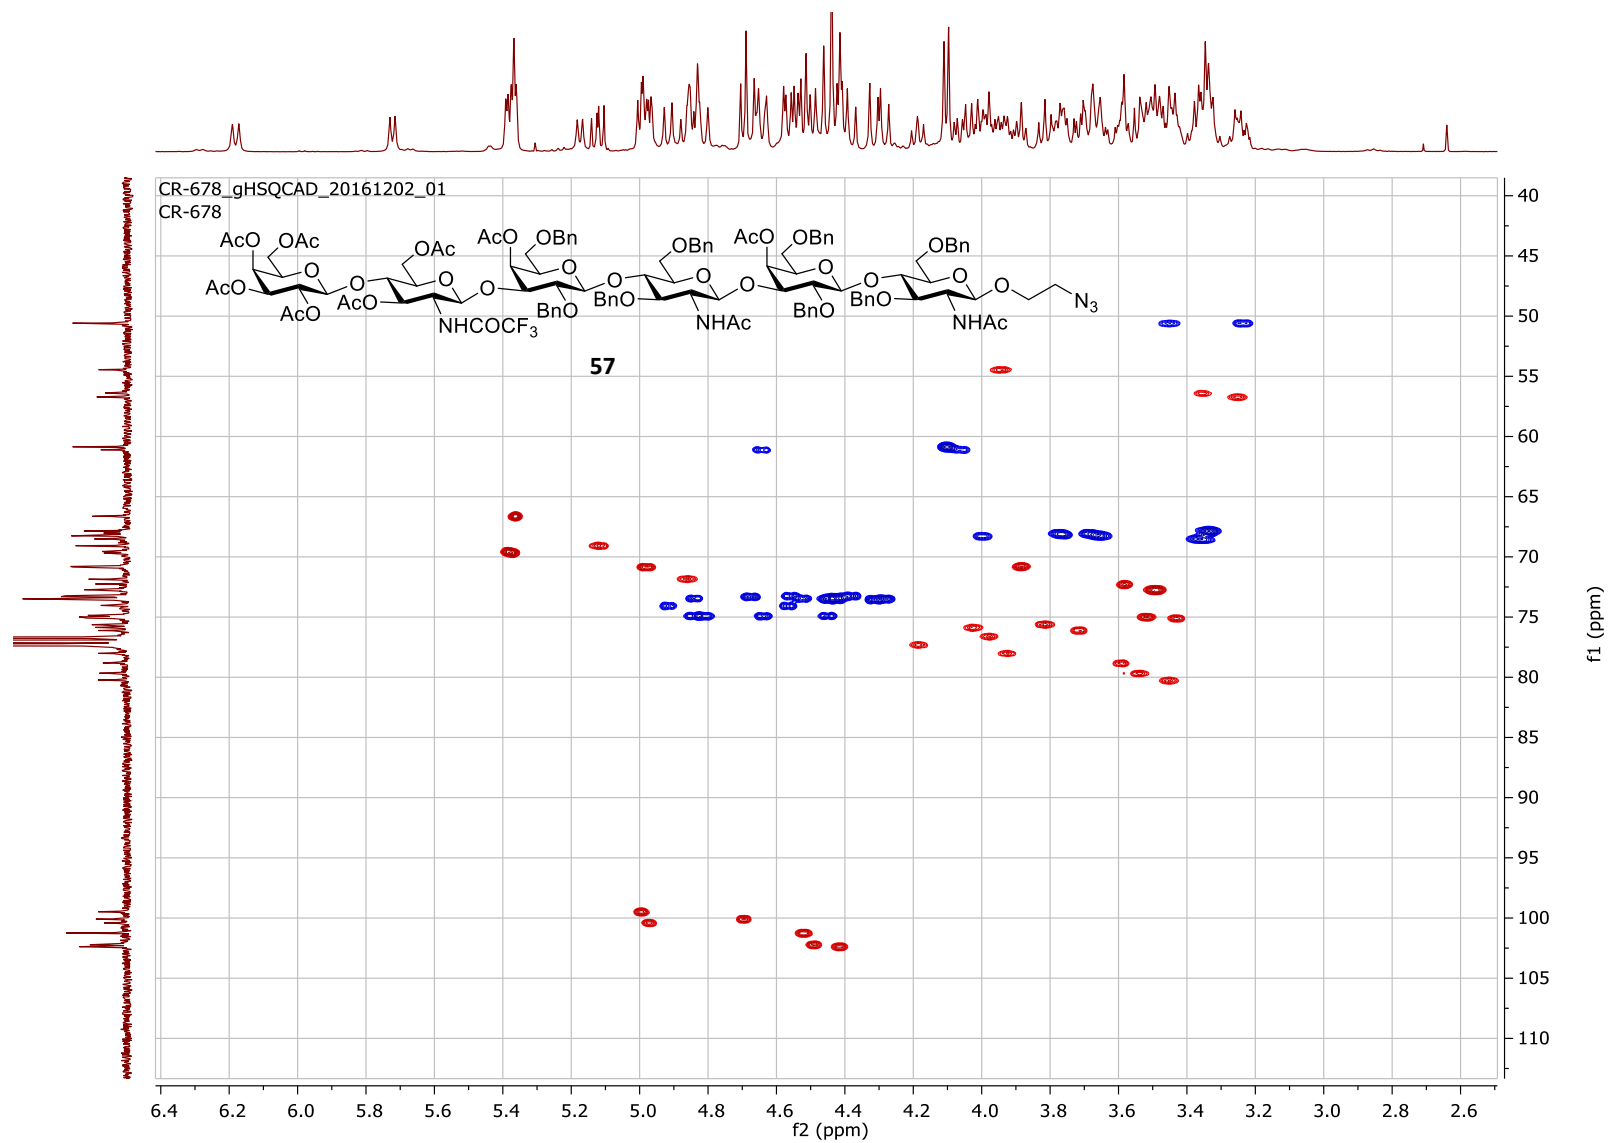

Compound 46:  
<sup>1</sup>H NMR

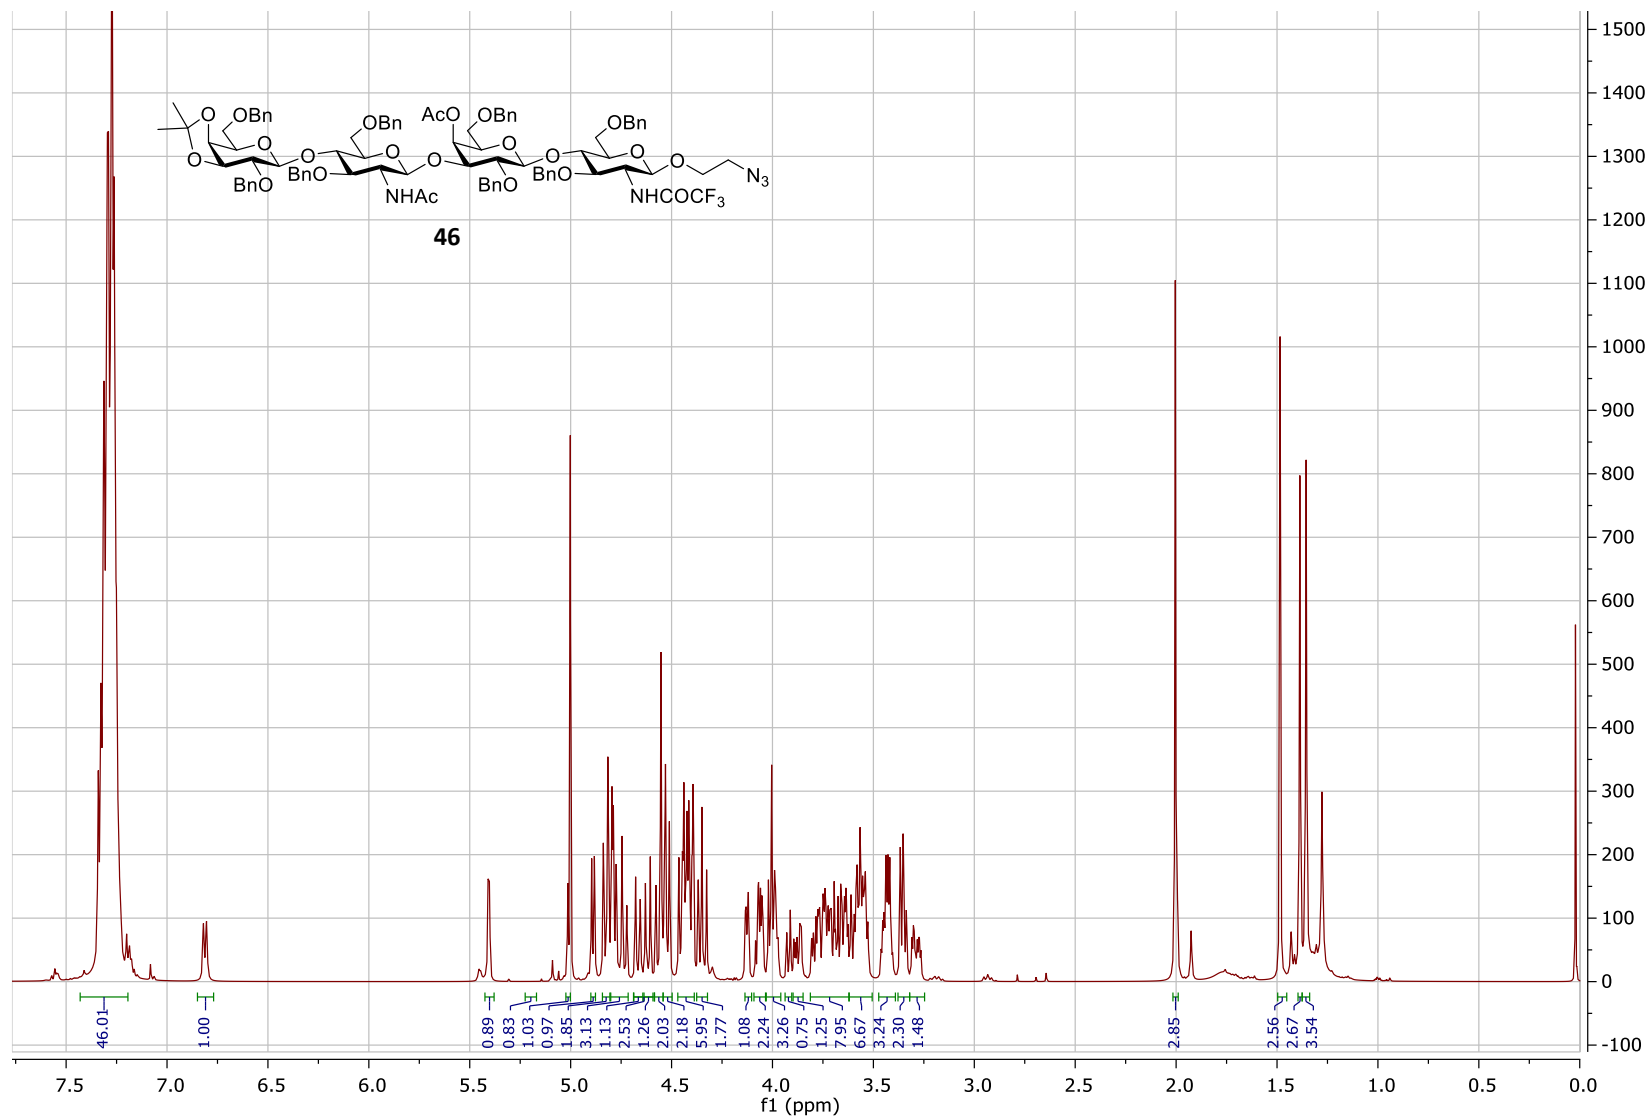



Compound **52**:  
<sup>1</sup>H NMR

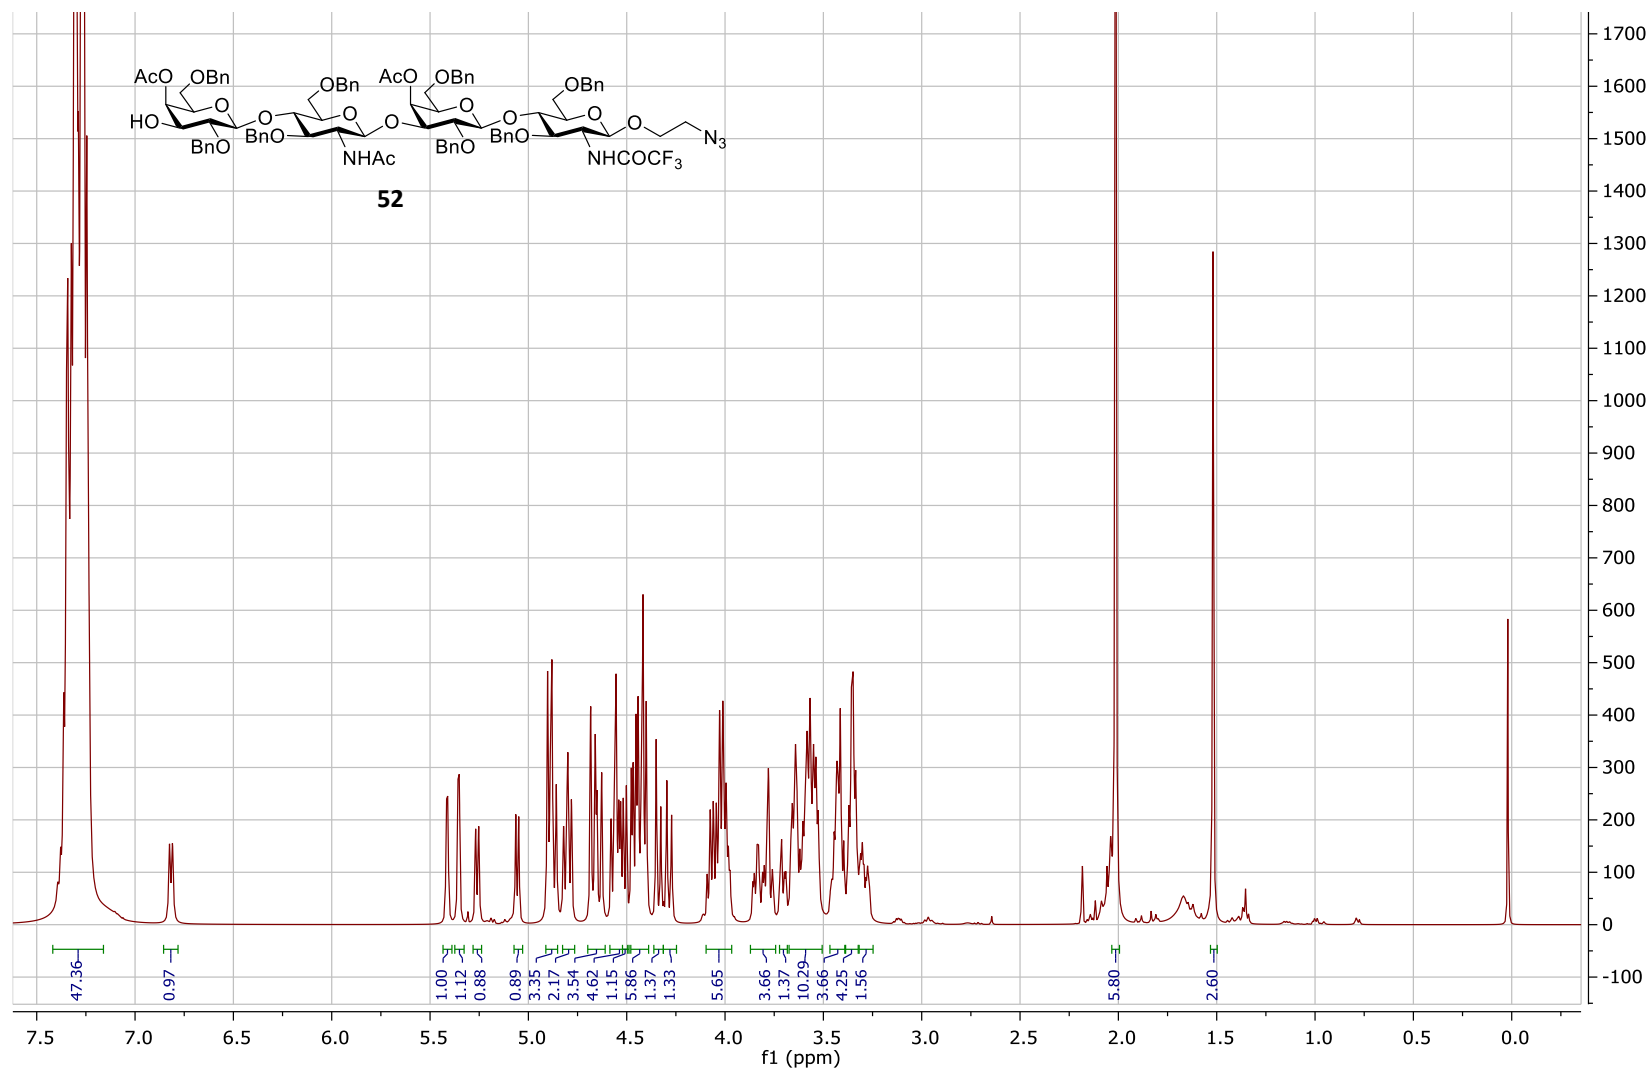

Compound **52**:  
<sup>13</sup>C NMR

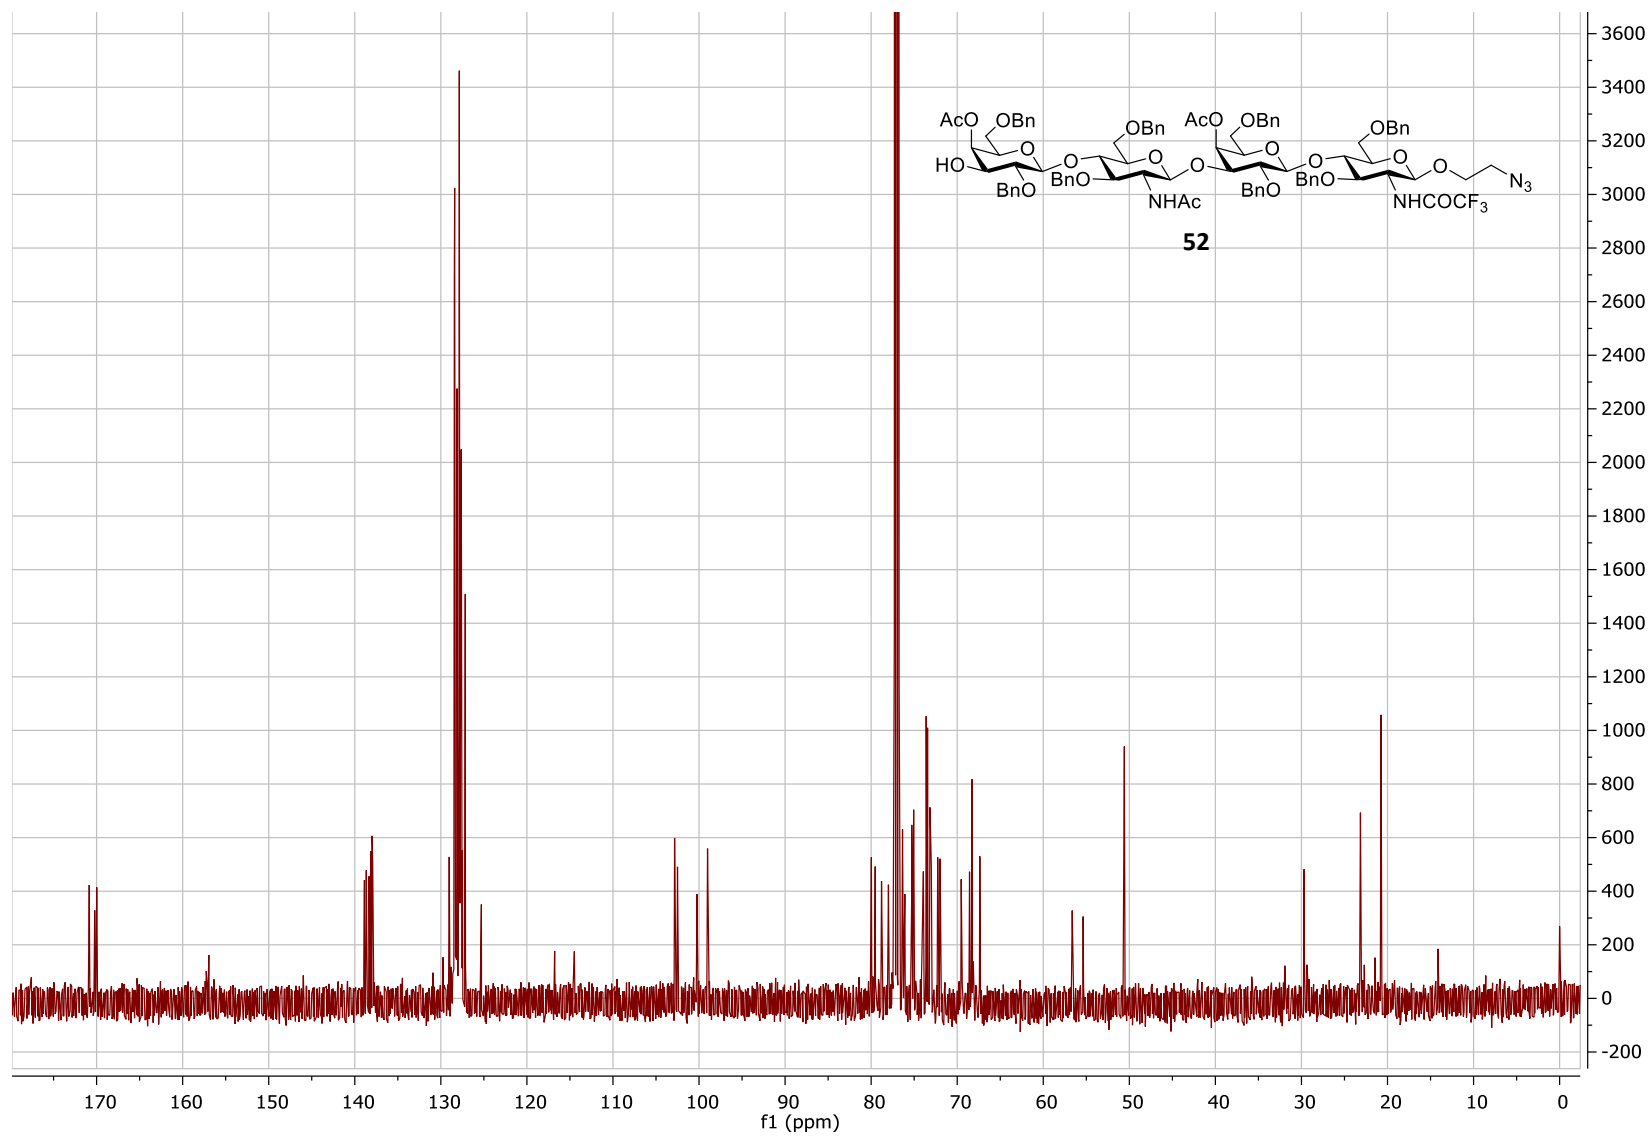

Compound 59:  
<sup>1</sup>H NMR

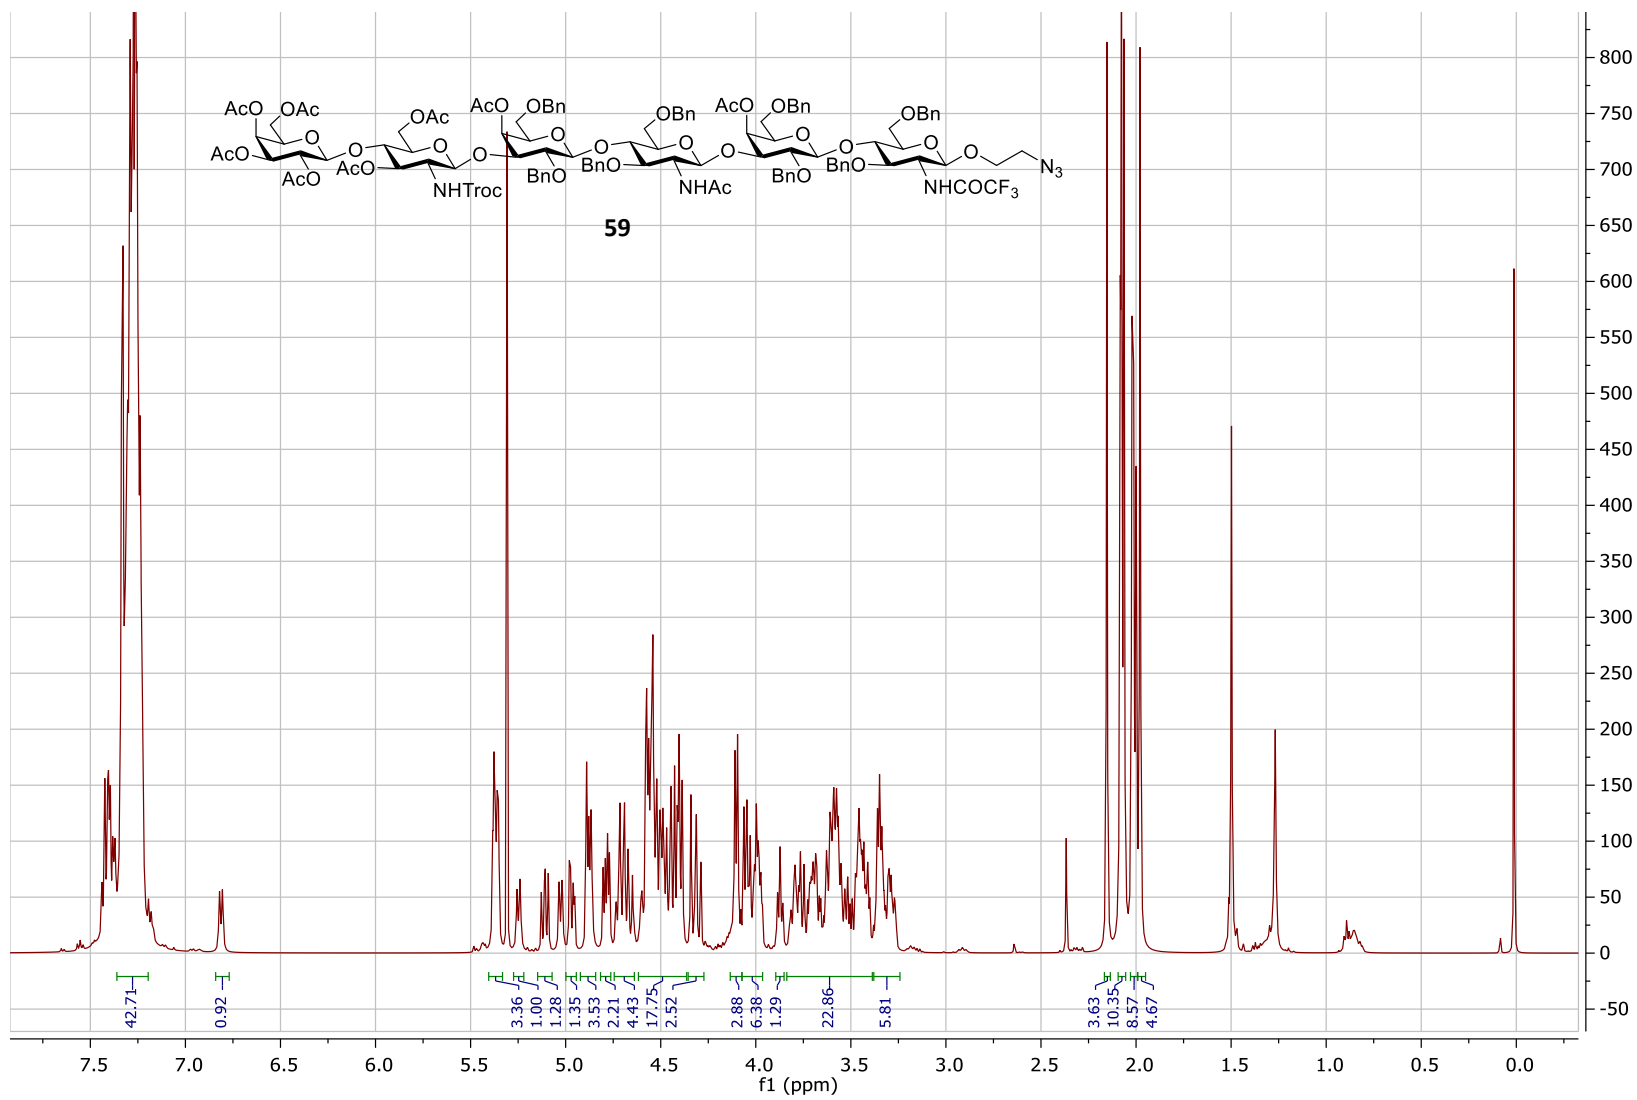

Compound **59**:  
<sup>13</sup>C NMR

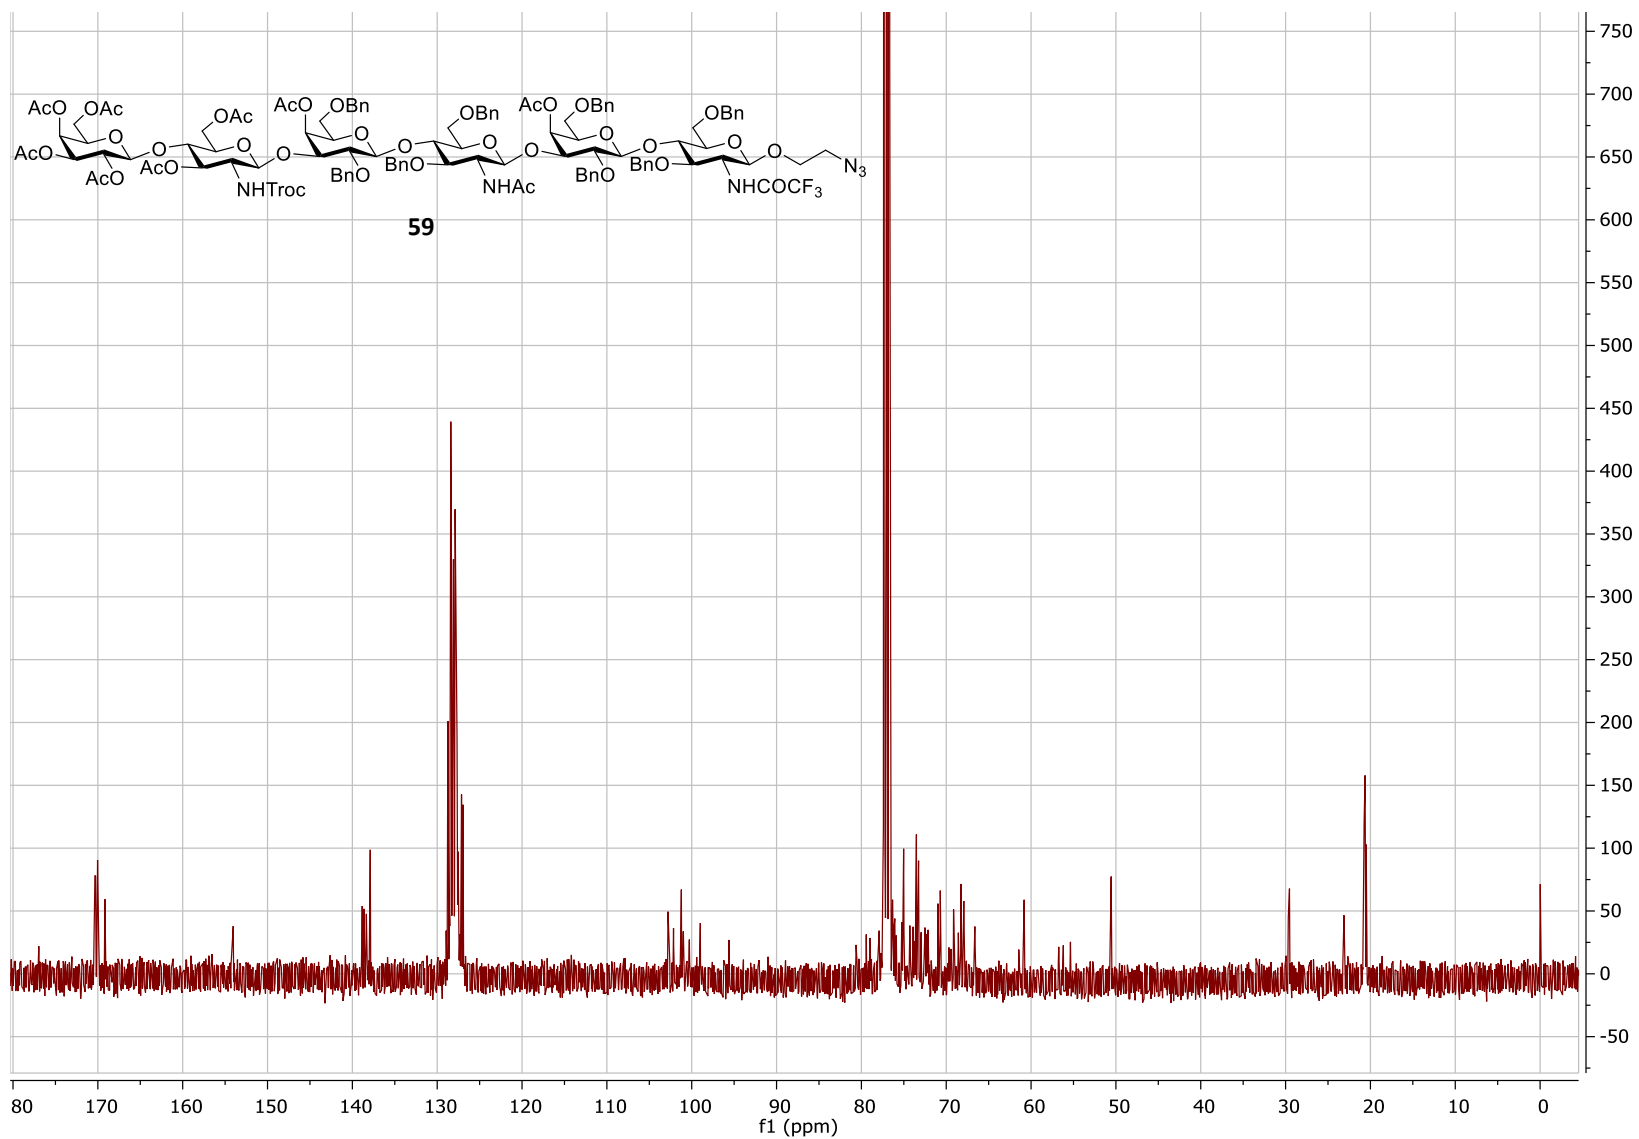



Compound **59**:

$^1\text{H}$ - $^{13}\text{C}$  HSQC (6.8 – 3 ppm zoom-in)

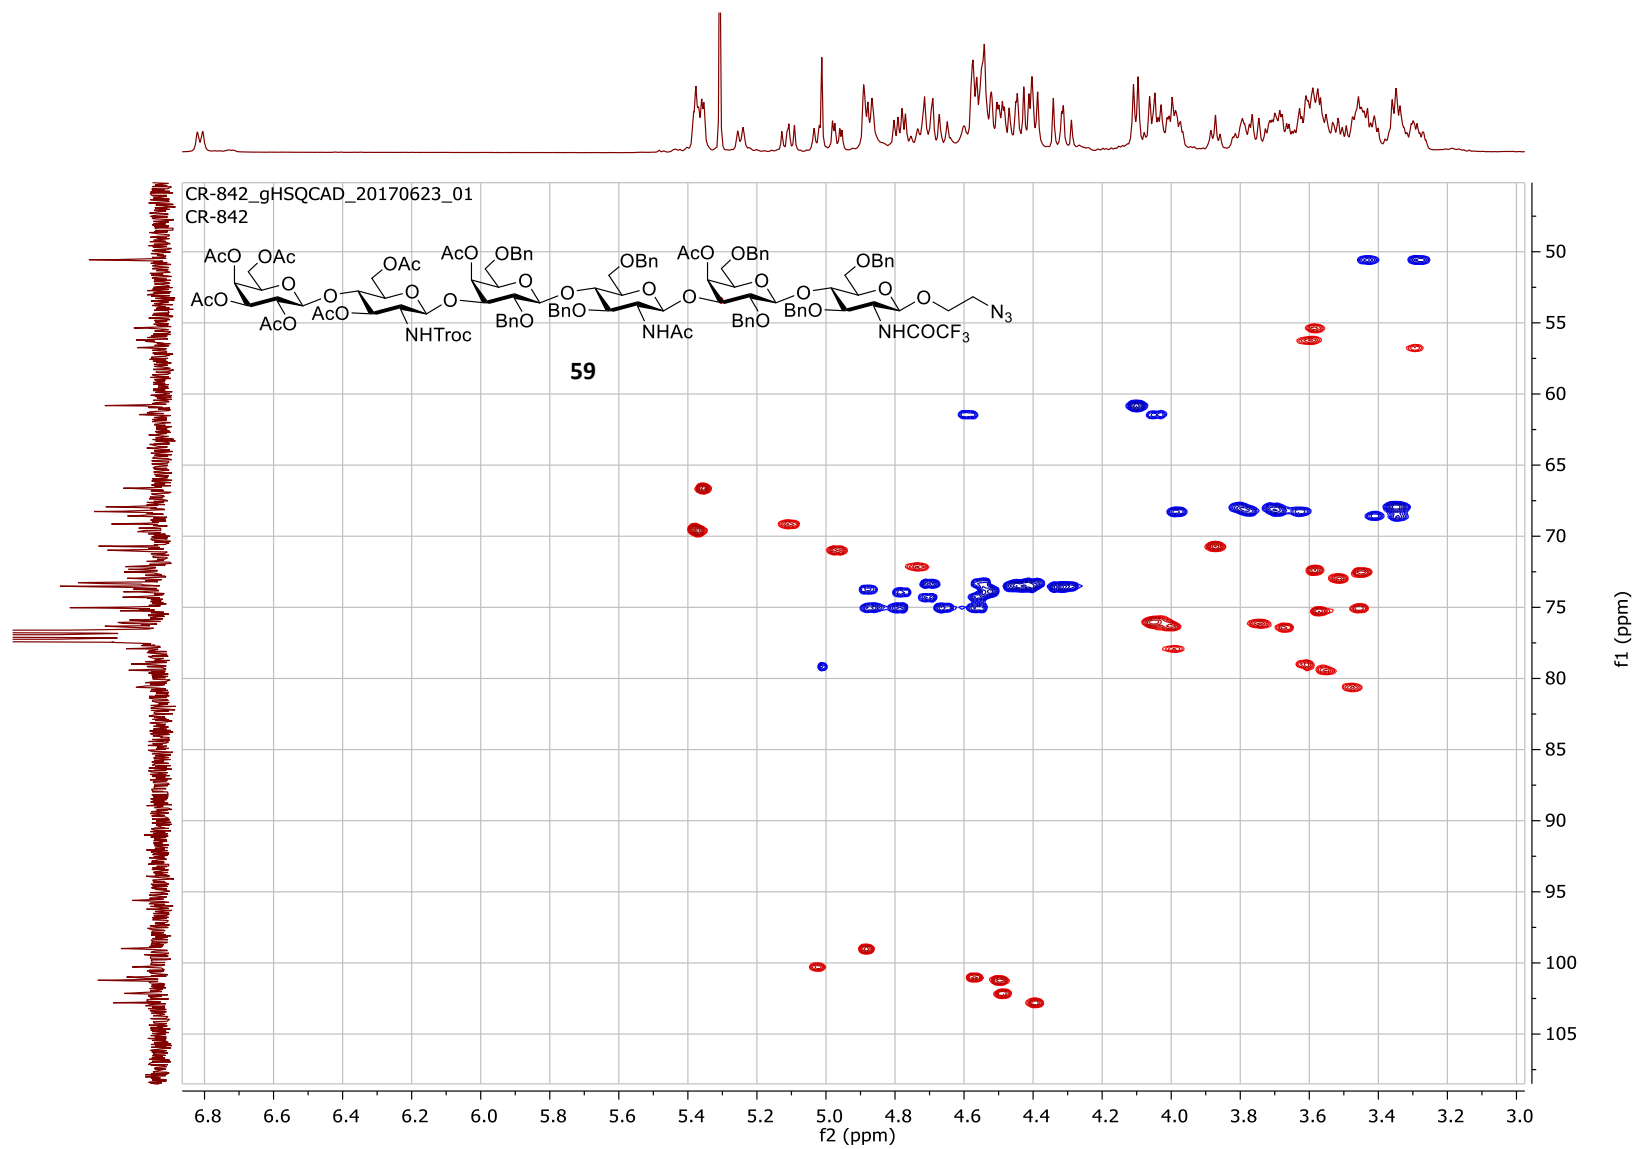

Supplement: c8ob03066a2.pdf [file c8ob03066a2.pdf]
